# Supplementary material for: New neuroprotective derivatives of cinnamic acid by biotransformation
Source: Royal Society of Chemistry journal article supplement (doi:10.1039/d3fo04802k), 2024-01-01

Hadir alkhurasawy-CM-6-APT-ES

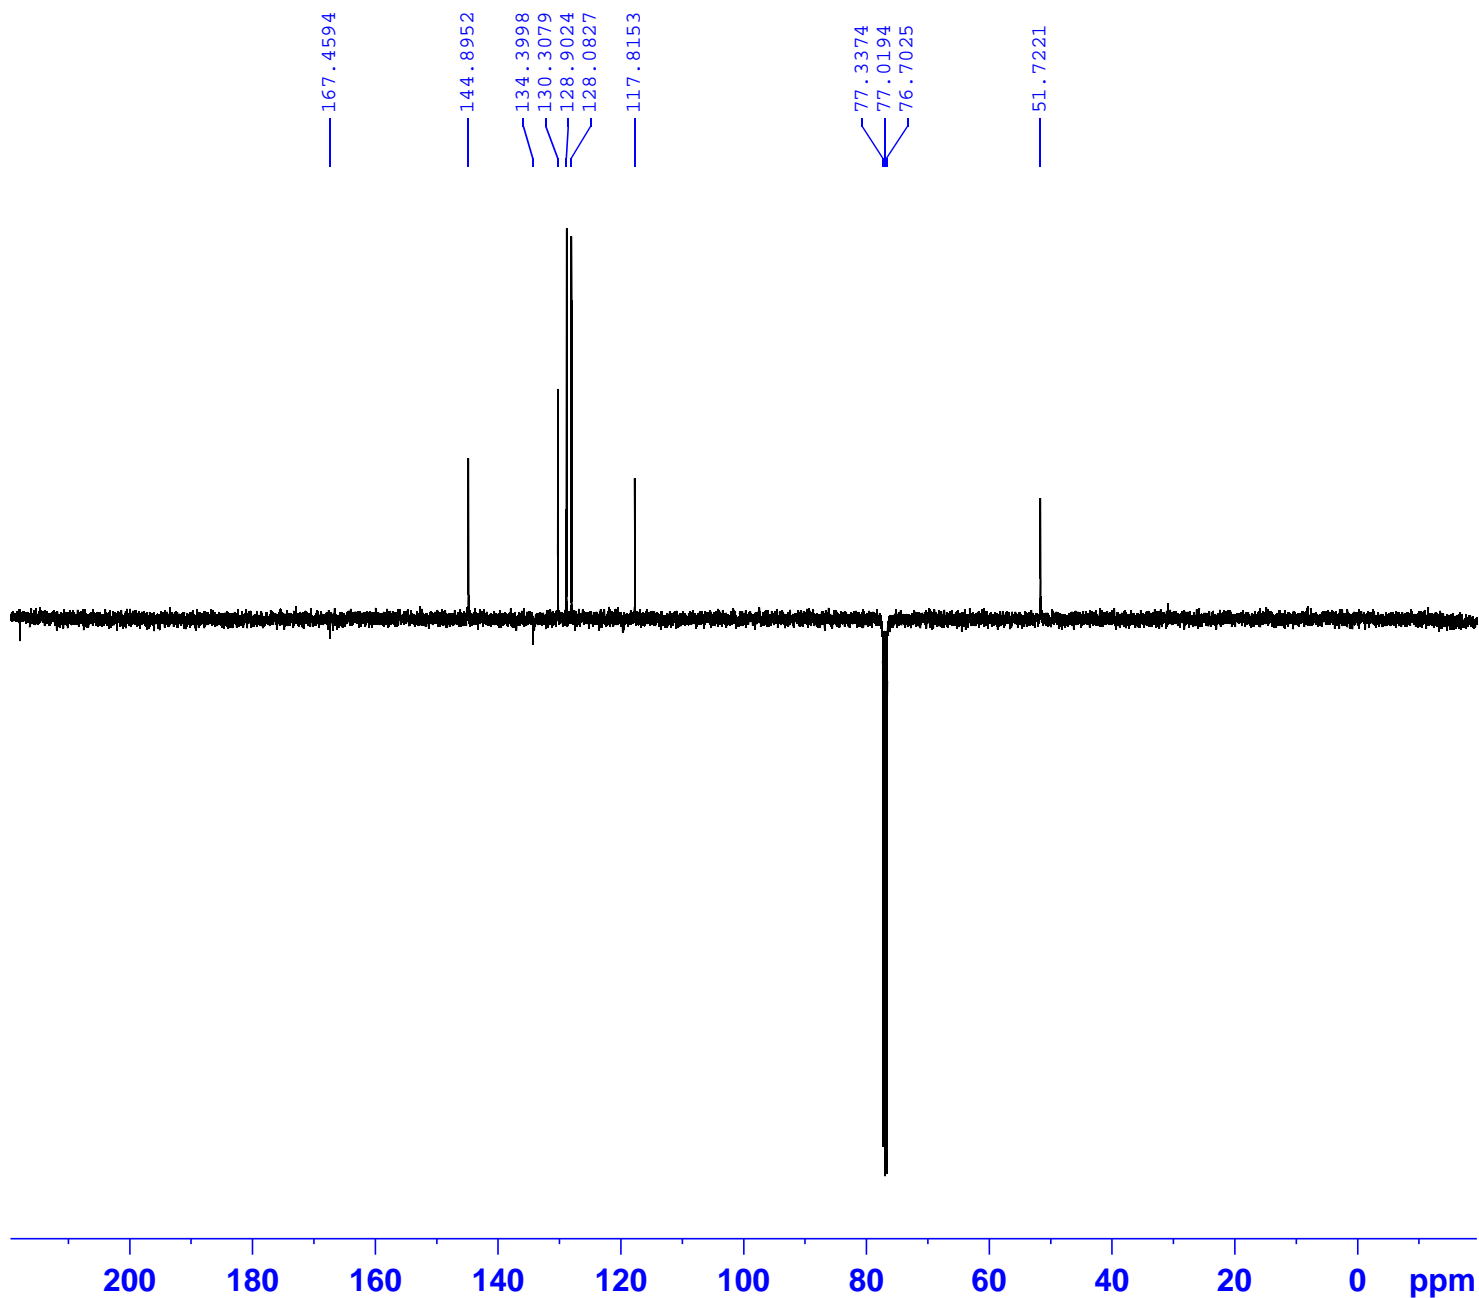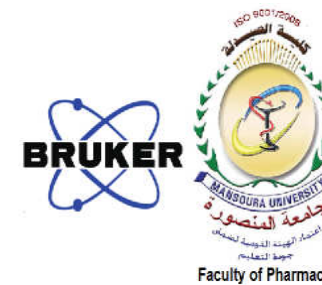

Current Data Parameters  
 NAME Hadir alkhurasawy-CM-6-APT-ES  
 EXPNO 10  
 PROCNO 1

F2 - Acquisition Parameters  
 Date\_ 20220707  
 Time 11.18 h  
 INSTRUM spect  
 PROBHD Z108618\_0945 (   
 PULPROG jmod  
 TD 65536  
 SOLVENT CDCl3  
 NS 2200  
 DS 4  
 SWH 24038.461 Hz  
 FIDRES 0.733596 Hz  
 AQ 1.3631488 sec  
 RG 197.77  
 DW 20.800 usec  
 DE 6.50 usec  
 TE 297.7 K  
 CNST2 145.0000000  
 CNST11 1.0000000  
 D1 2.00000000 sec  
 D20 0.00689655 sec  
 TD0 1  
 SFO1 100.6404331 MHz  
 NUC1 13C  
 P1 10.00 usec  
 P2 20.00 usec  
 PLW1 47.00000000 W  
 SFO2 400.2016008 MHz  
 NUC2 1H  
 CPDPRG[2] waltz16  
 PCPD2 90.00 usec  
 PLW2 13.00000000 W  
 PLW12 0.29249999 W

F2 - Processing parameters  
 SI 32768  
 SF 100.6303700 MHz  
 WDW EM  
 SSB 0  
 LB 1.00 Hz  
 GB 0  
 PC 1.40

Hadir alkhurasawy-CM-6-APT-ES

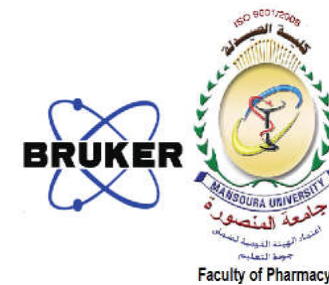

Current Data Parameters  
NAME Hadir alkhurasawy-CM-6-APT-ES  
EXPNO 10  
PROCNO 1

F2 - Acquisition Parameters  
Date\_ 20220707  
Time 11.18 h  
INSTRUM spect  
PROBHD z108618\_0945 (  
PULPROG jmod  
TD 65536  
SOLVENT CDCl3  
NS 2200  
DS 4  
SWH 24038.461 Hz  
FIDRES 0.733596 Hz  
AQ 1.3631488 sec  
RG 197.77  
DW 20.800 usec  
DE 6.50 usec  
TE 297.7 K  
CNST2 145.0000000  
CNST11 1.0000000  
D1 2.00000000 sec  
D20 0.00689655 sec  
TD0 1  
SF01 100.6404331 MHz  
NUC1 13C  
P1 10.00 usec  
P2 20.00 usec  
PLW1 47.00000000 W  
SFO2 400.2016008 MHz  
NUC2 1H  
CPDPRG[2] waltz16  
PCPD2 90.00 usec  
PLW2 13.00000000 W  
PLW12 0.29249999 W

F2 - Processing parameters  
SI 32768  
SF 100.6303700 MHz  
WDW EM  
SSB 0  
LB 1.00 Hz  
GB 0  
PC 1.40

Hadir alkhurasawy-CM-6-APT-ES

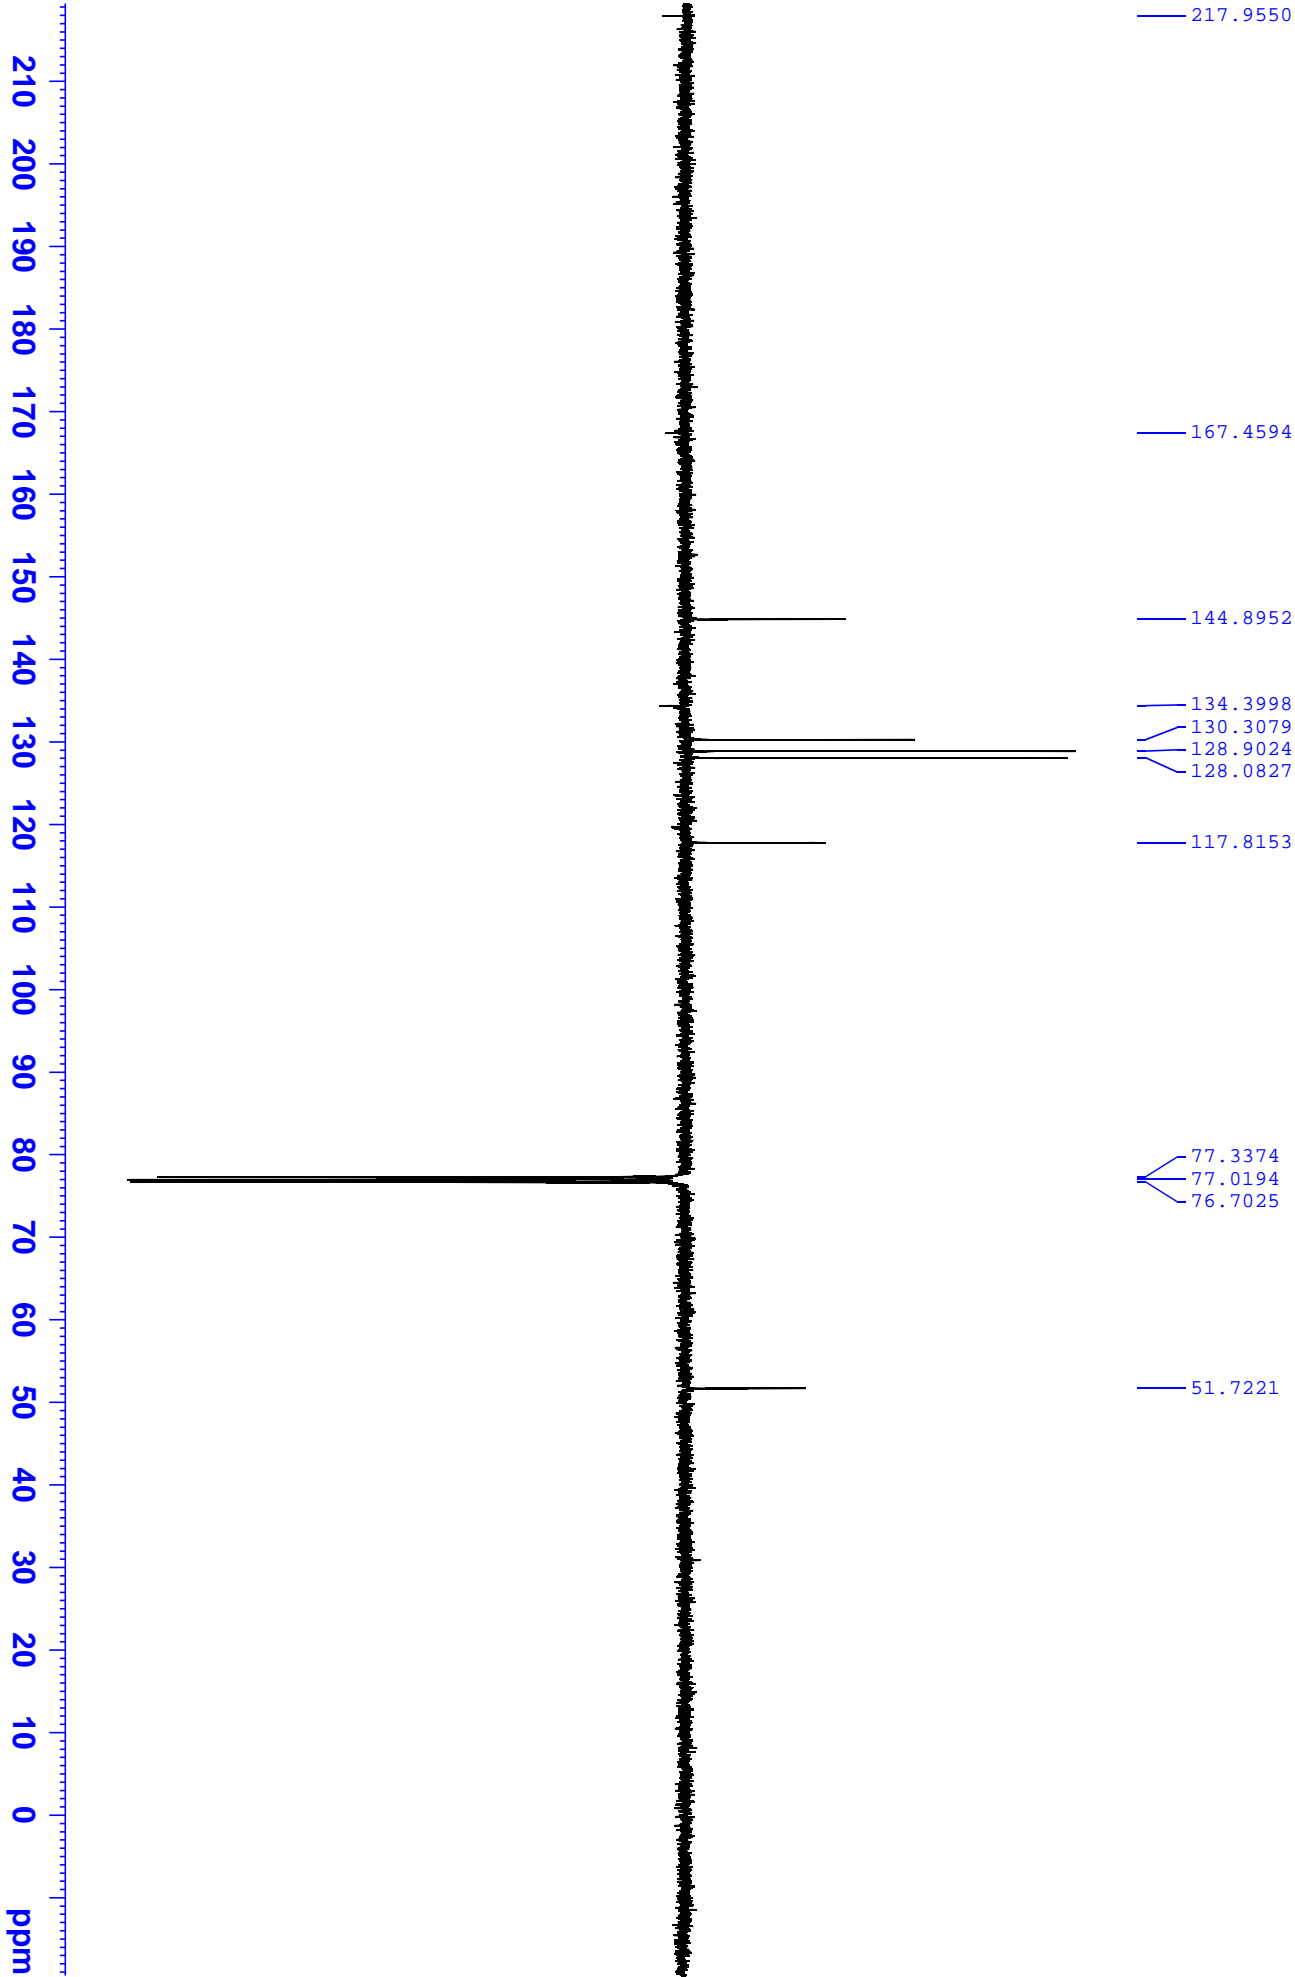

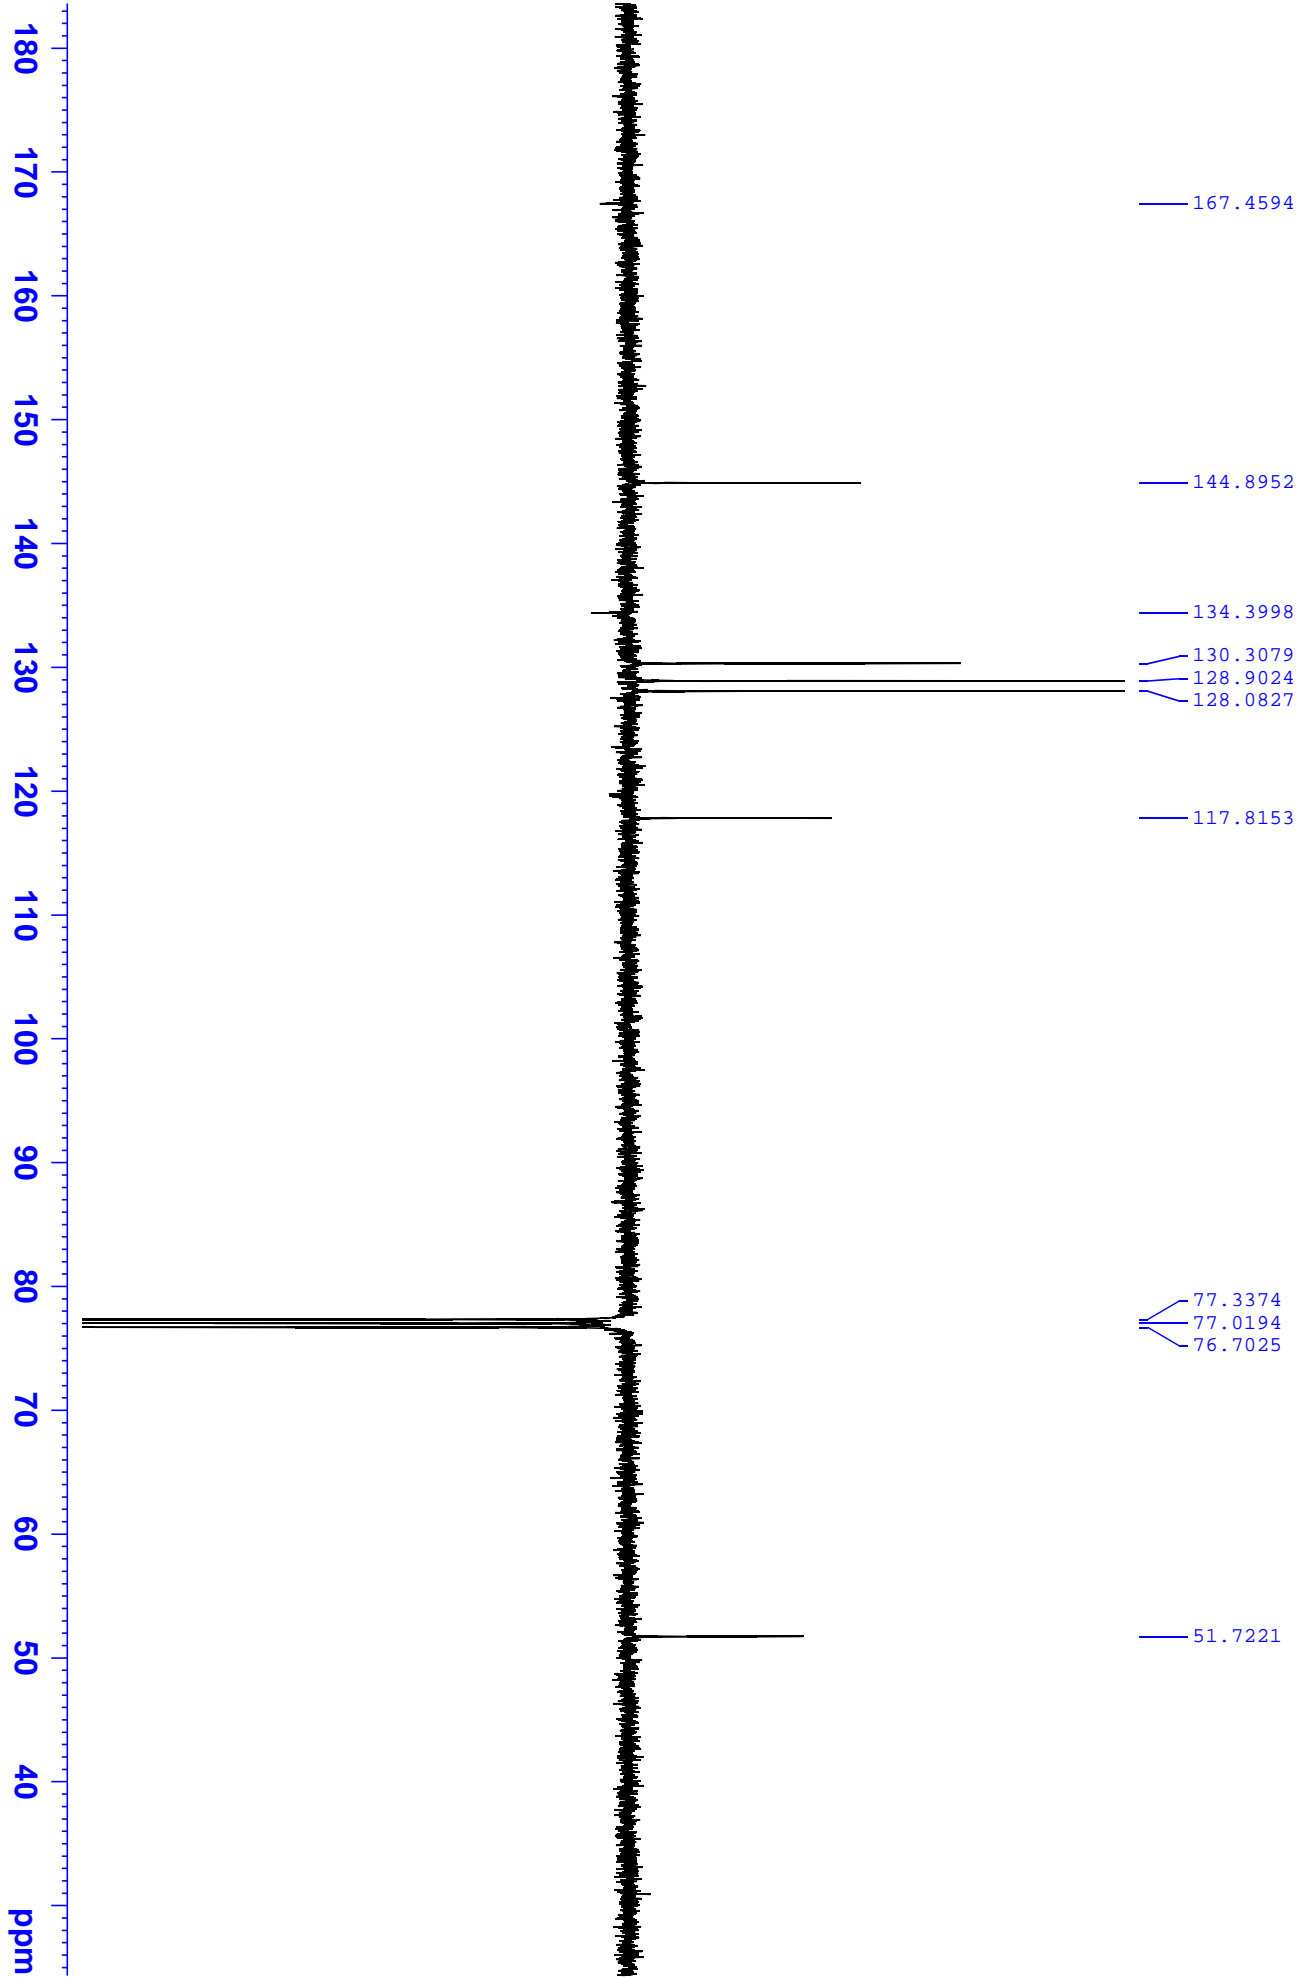

Hadir alkhurasawy-CM-6-APT-ES

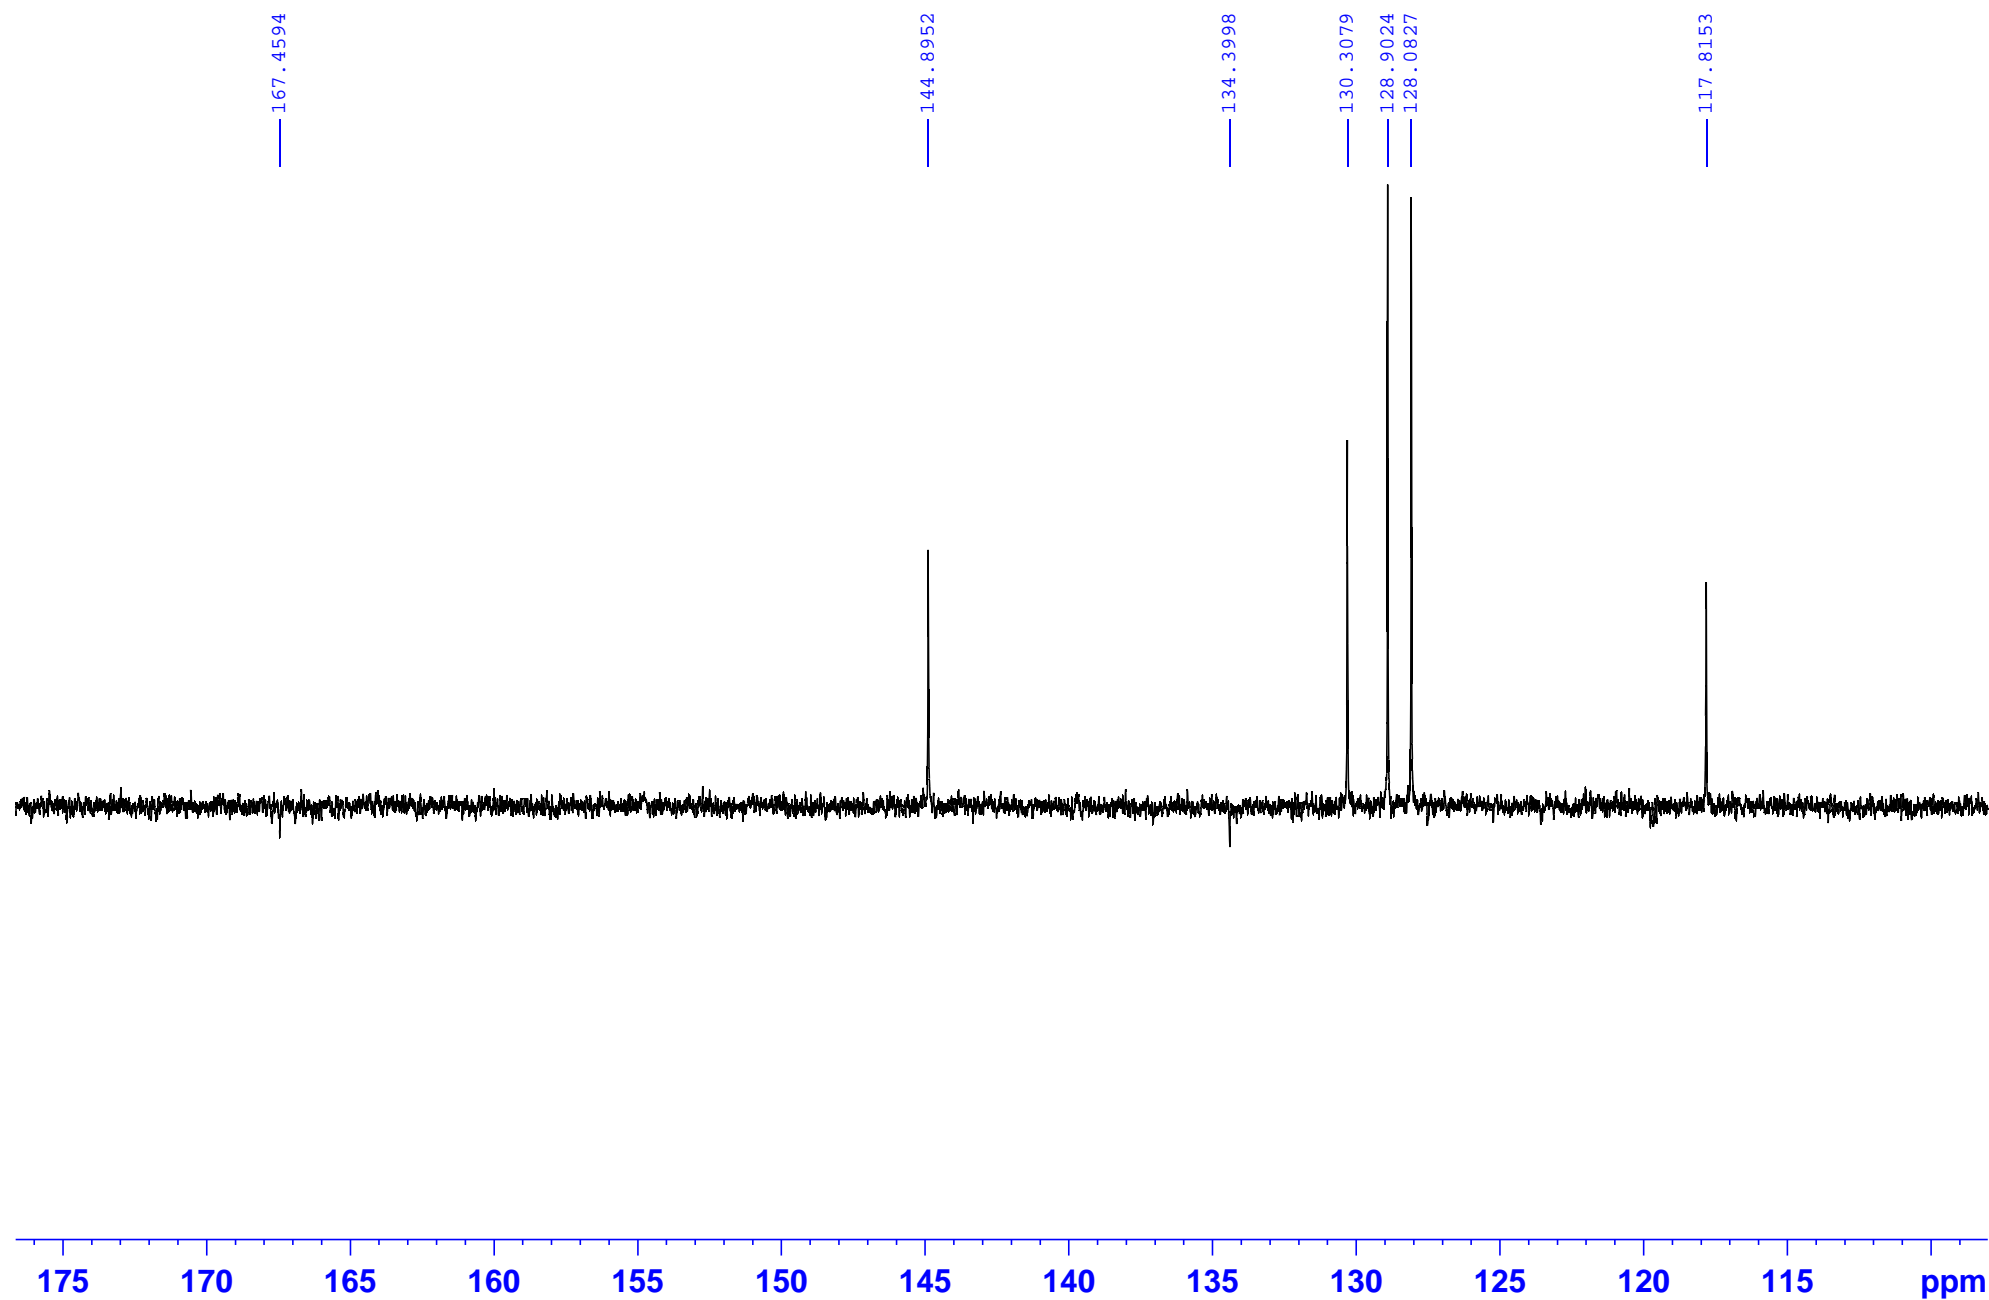

Hadir alkhurasawy-CM-6-APT-ES

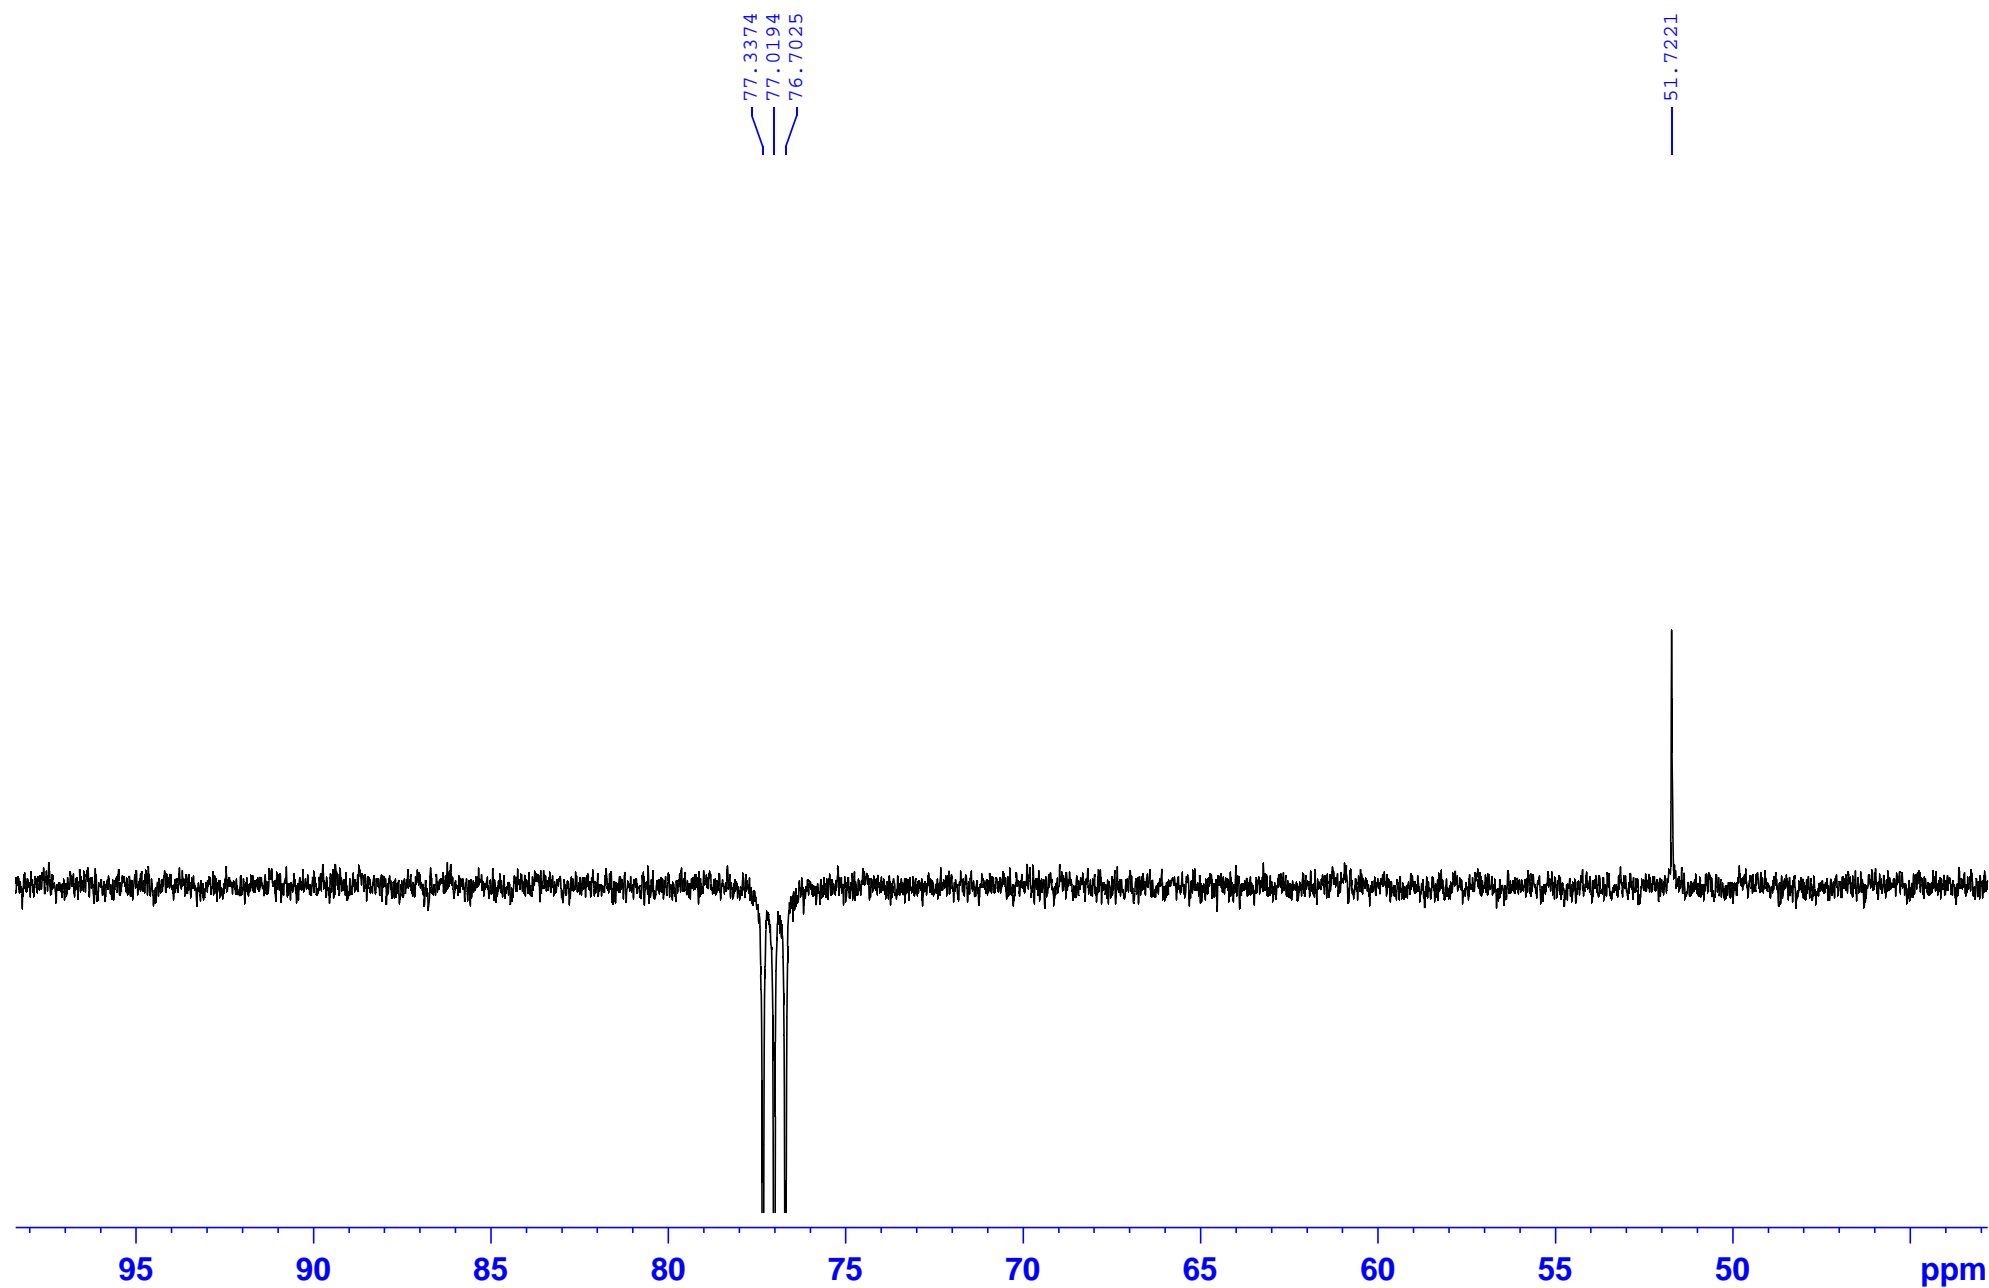

Hadeer ElKharasawy - CM-6 - Hnmr - T

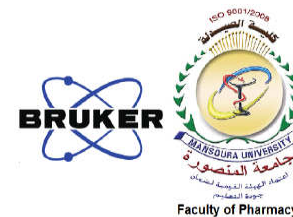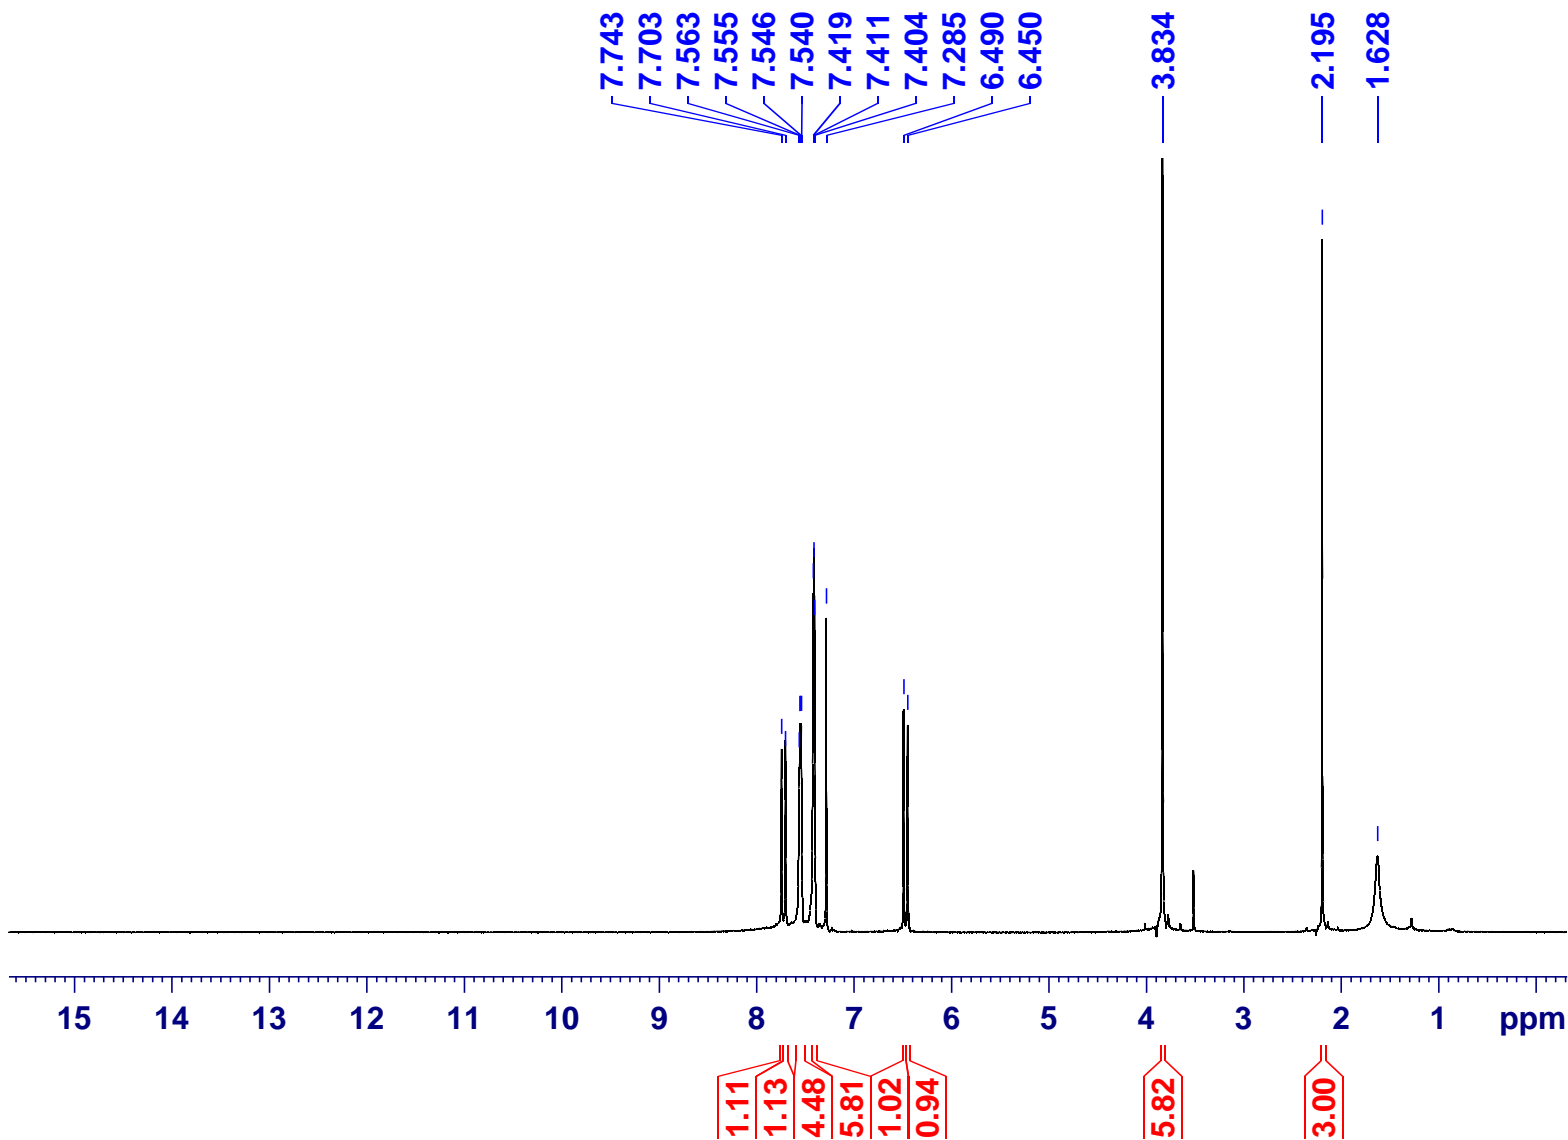

Current Data Parameters  
NAME Hadeer ElKharasawy - CM-6 - Hnmr - T  
EXPNO 10  
PROCNO 1

F2 - Acquisition Parameters  
Date\_ 20220622  
Time 11.02 h  
INSTRUM spect  
PROBHD zg30  
PULPROG zg30  
TD 65536  
SOLVENT CDCl3  
NS 16  
DS 2  
SWH 8012.820 Hz  
FIDRES 0.244532 Hz  
AQ 4.0894465 sec  
RG 197.77  
DW 62.400 usec  
DE 6.50 usec  
TE 0 K  
D1 1.00000000 sec  
TD0 1  
SFO1 400.2024712 MHz  
NUC1 1H  
P1 13.50 usec  
PLW1 13.00000000 W

F2 - Processing parameters  
SI 65536  
SF 400.2000000 MHz  
WDW EM  
SSB 0  
LB 0.30 Hz  
GB 0  
PC 1.00

Hadeer ElKharasawy - CM-6 - Hnmr - T

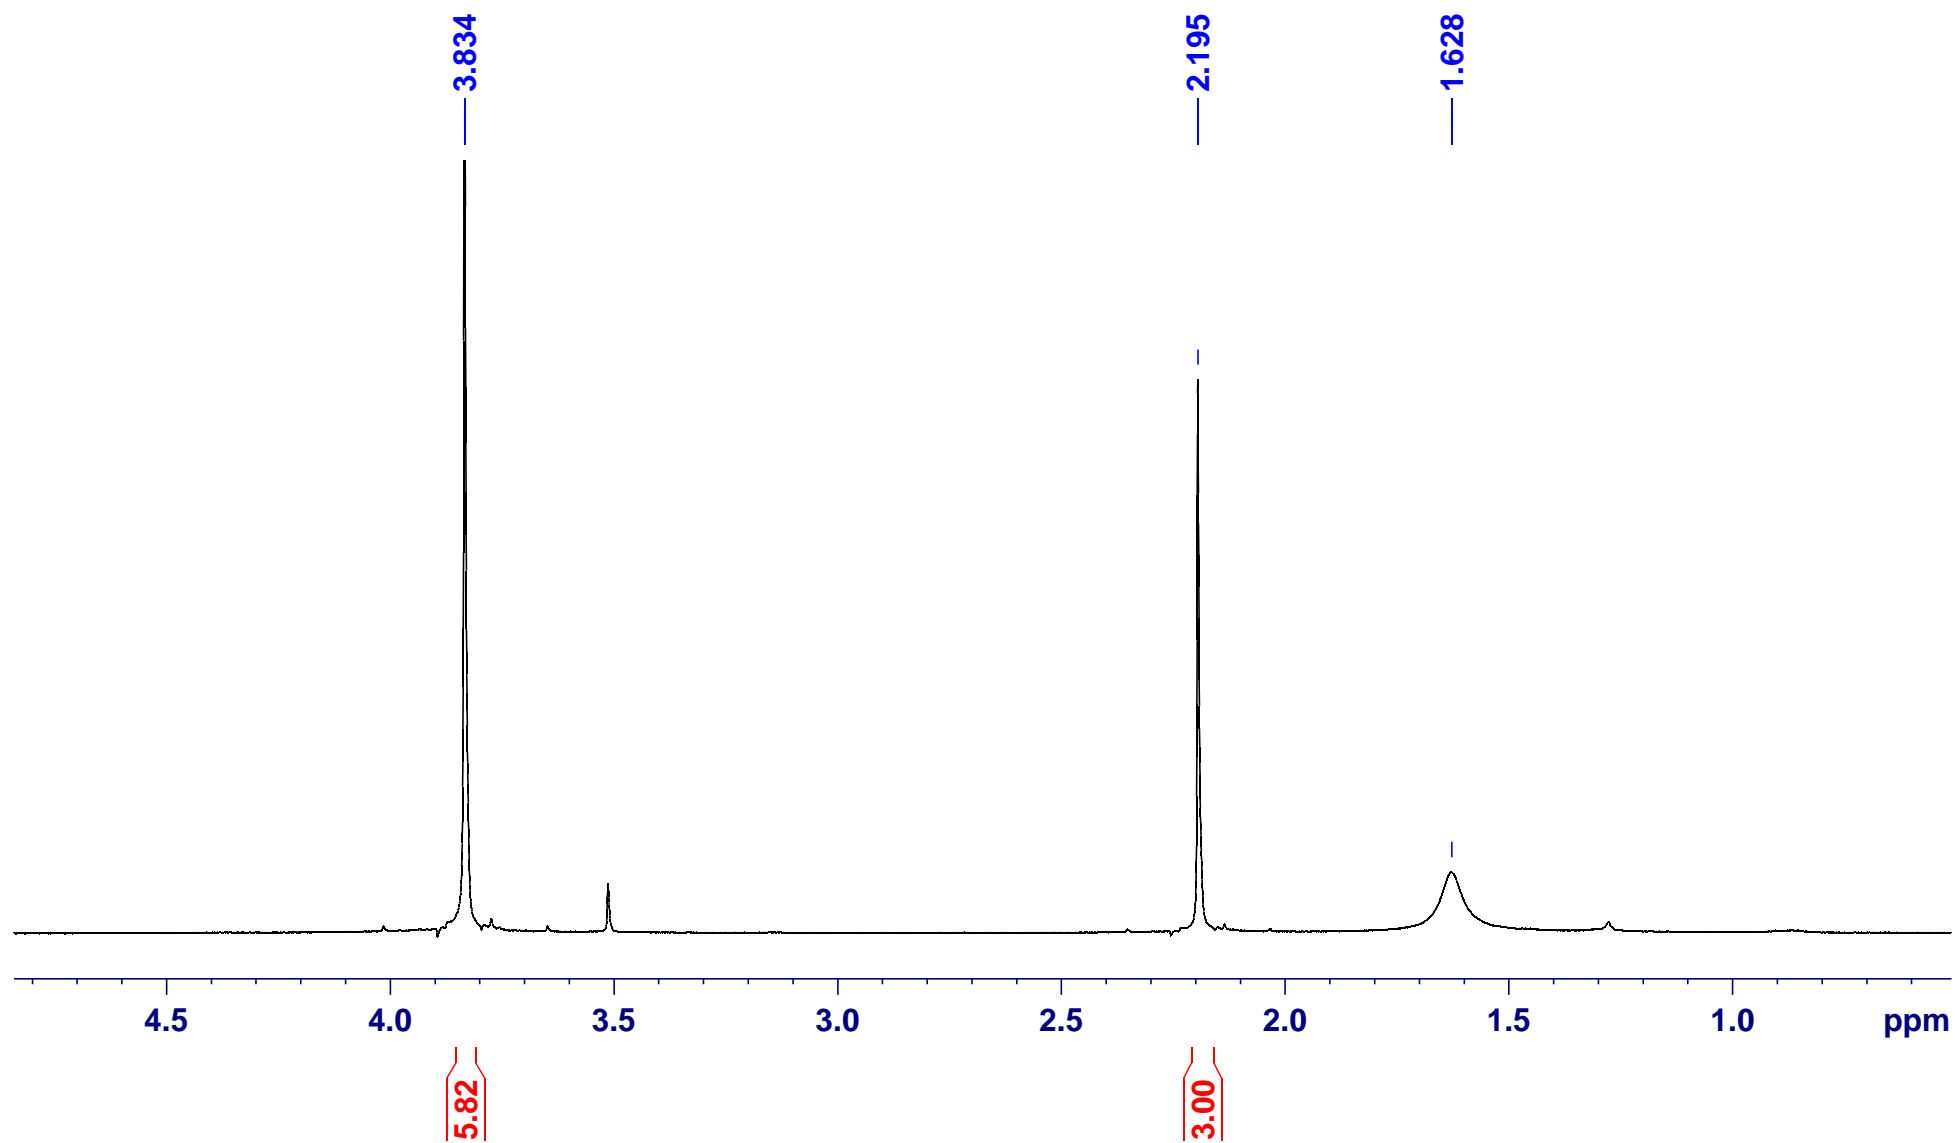

Hadeer ElKharasawy - CM-6 - Hnmr - 1

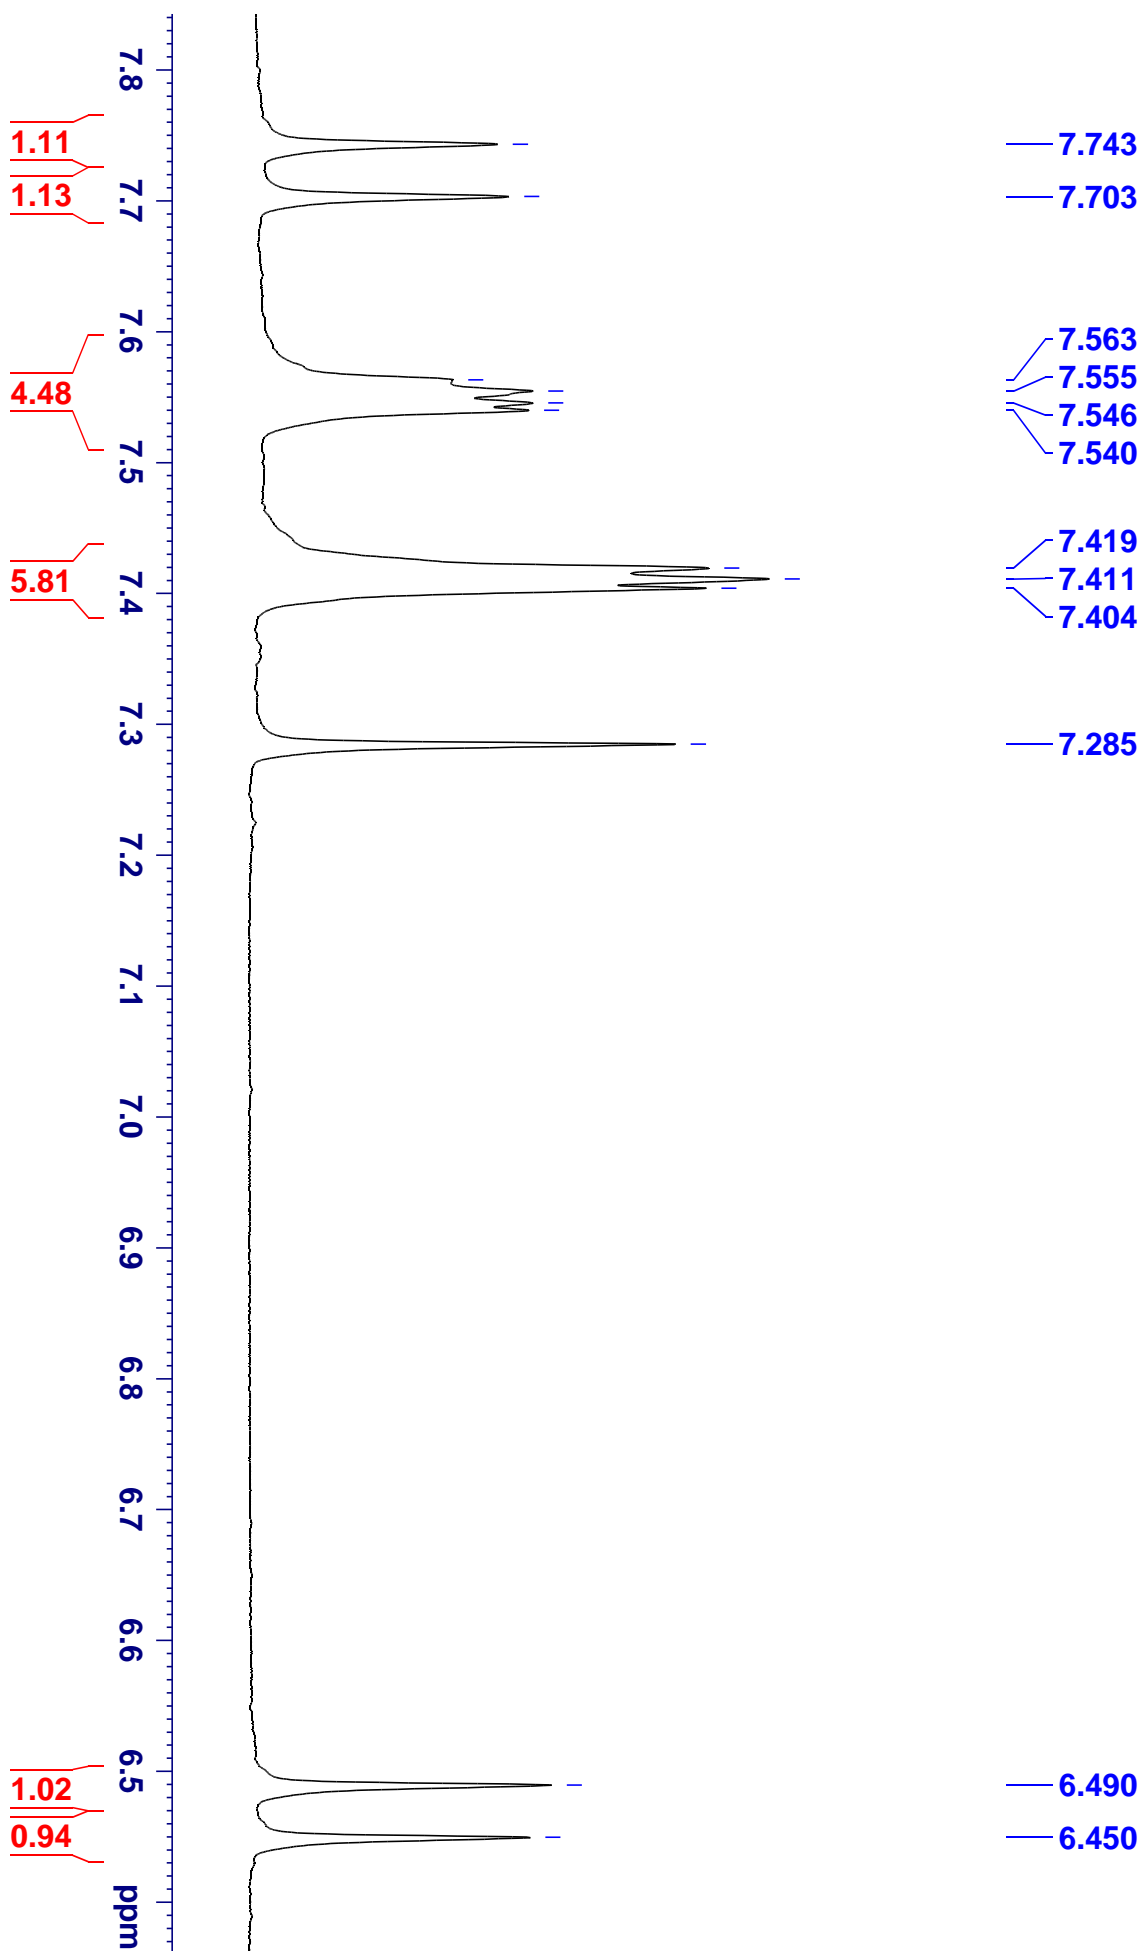

Hadeer ElKharasawy - CM-6 - Hnmr - T

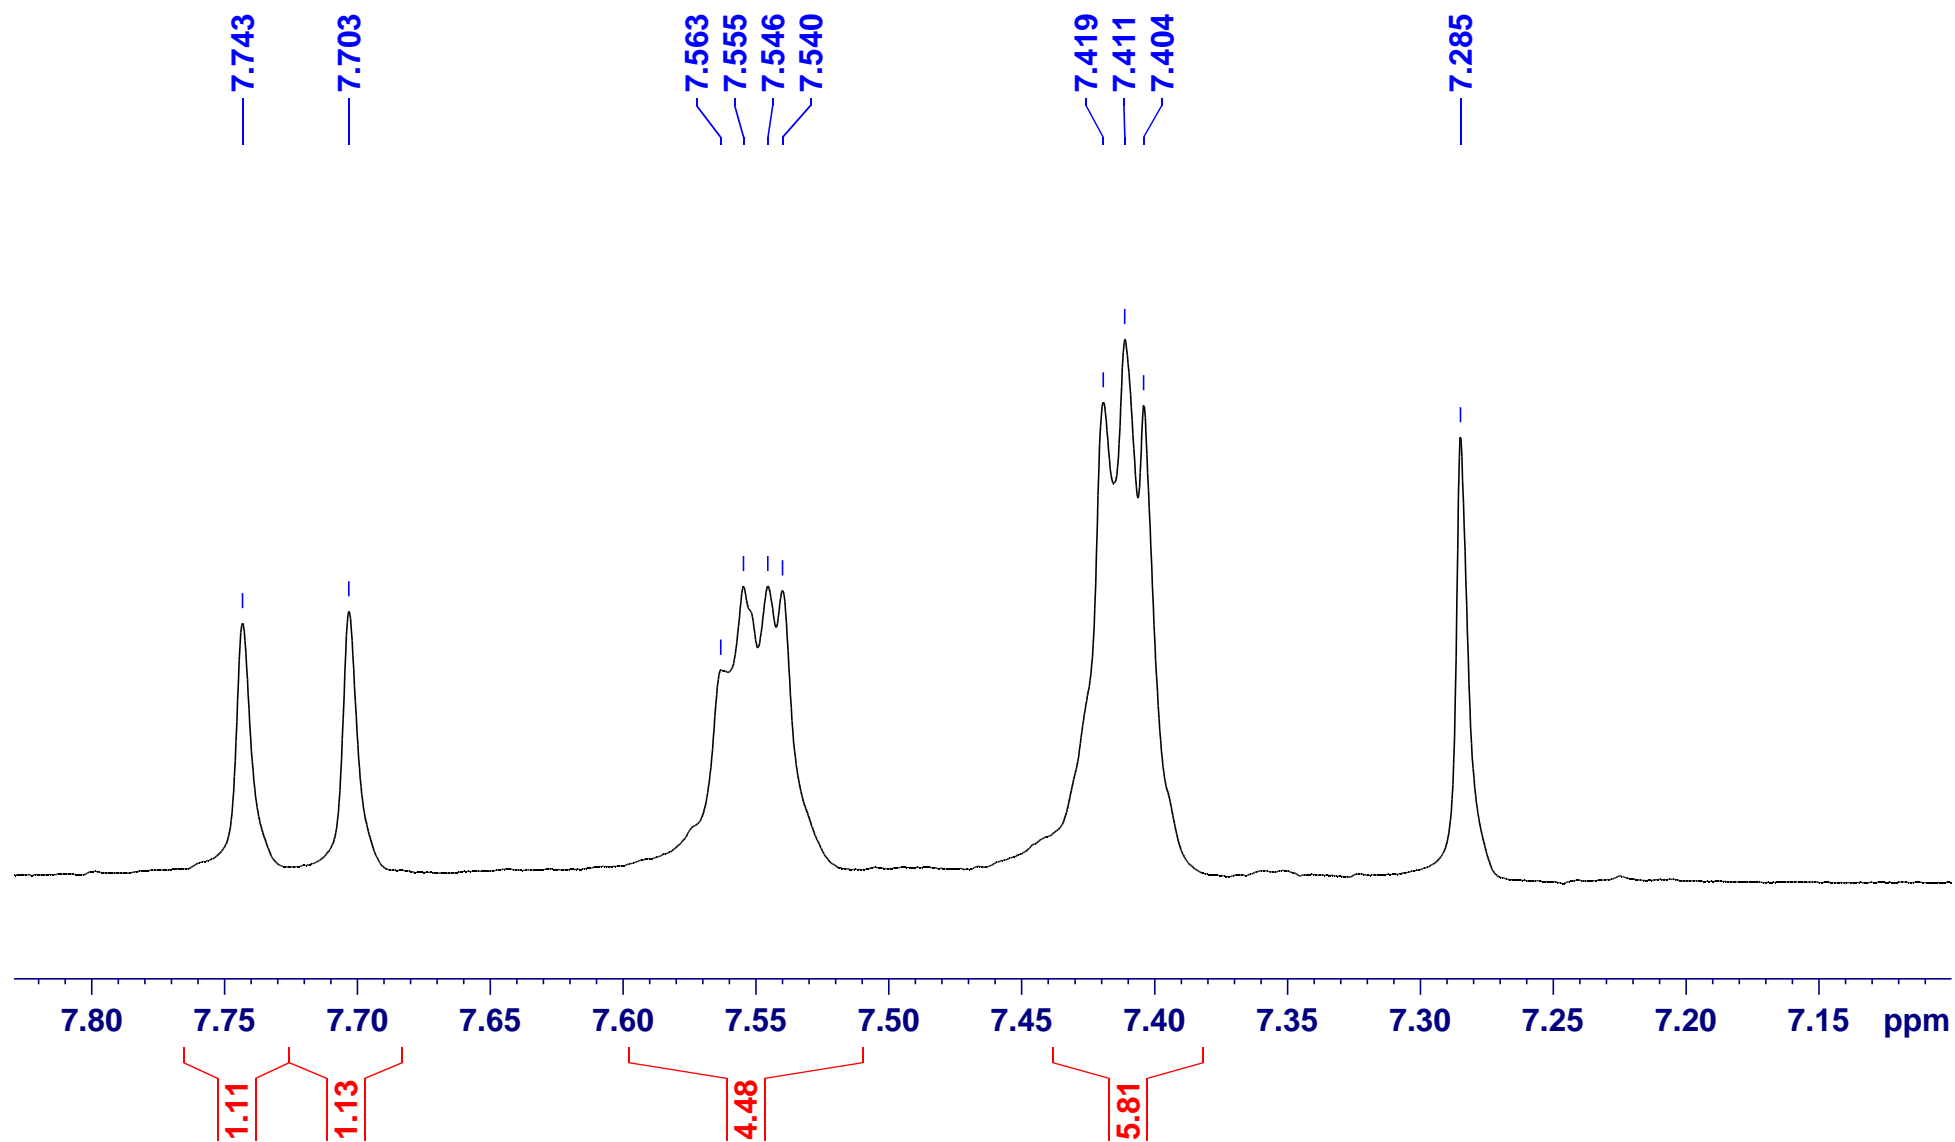

Supplement: d3fo04802k1.zip [file d3fo04802k1.zip]
