# Supplementary material for: New neuroprotective derivatives of cinnamic acid by biotransformation
Source: Royal Society of Chemistry journal article supplement (doi:10.1039/d3fo04802k), 2024-01-01

Hadeer Elkharasawy-CM5-APT-AF

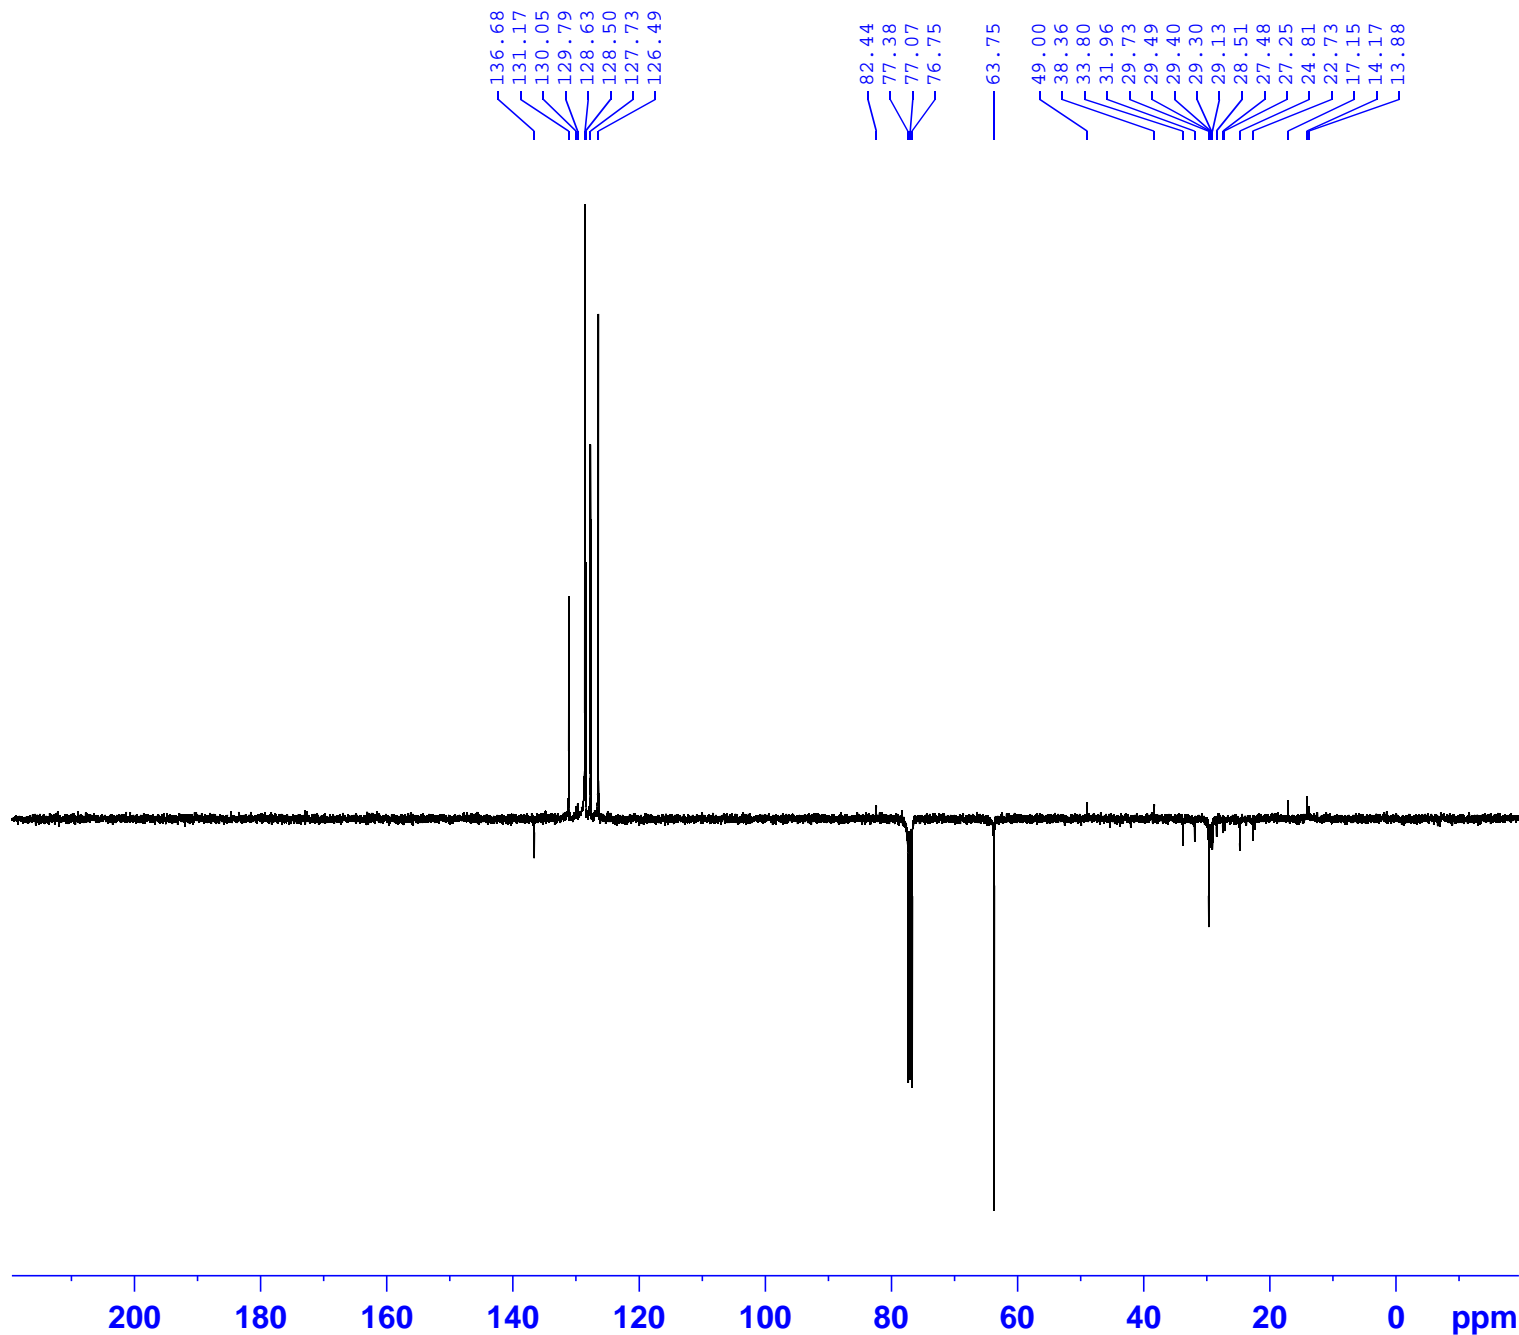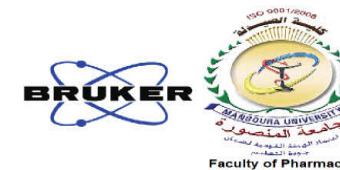

Current Data Parameters  
 NAME Hadeer Elkharasawy-CM5-APT-AF  
 EXPNO 20  
 PROCNO 1

F2 - Acquisition Parameters  
 Date\_ 20211116  
 Time 6.51 h  
 INSTRUM spect  
 PROBHD Z108618\_0945 (  
 PULPROG jmod  
 TD 65536  
 SOLVENT CDCl3  
 NS 2600  
 DS 4  
 SWH 24038.461 Hz  
 FIDRES 0.733596 Hz  
 AQ 1.3631488 sec  
 RG 197.77  
 DW 20.800 usec  
 DE 6.50 usec  
 TE 294.8 K  
 CNST2 145.0000000  
 CNST11 1.0000000  
 D1 2.00000000 sec  
 D20 0.00689655 sec  
 TD0 1  
 SF01 100.6404331 MHz  
 NUC1 13C  
 P1 10.00 usec  
 P2 20.00 usec  
 PLW1 47.00000000 W  
 SF02 400.2016008 MHz  
 NUC2 1H  
 CPDPRG[2] waltz16  
 PCPD2 90.00 usec  
 PLW2 13.00000000 W  
 PLW12 0.29249999 W

F2 - Processing parameters  
 SI 32768  
 SF 100.6303700 MHz  
 WDW EM  
 SSB 0  
 LB 1.00 Hz  
 GB 0  
 PC 1.40

Hadeer Elkharasawy-CM5-APT-AF

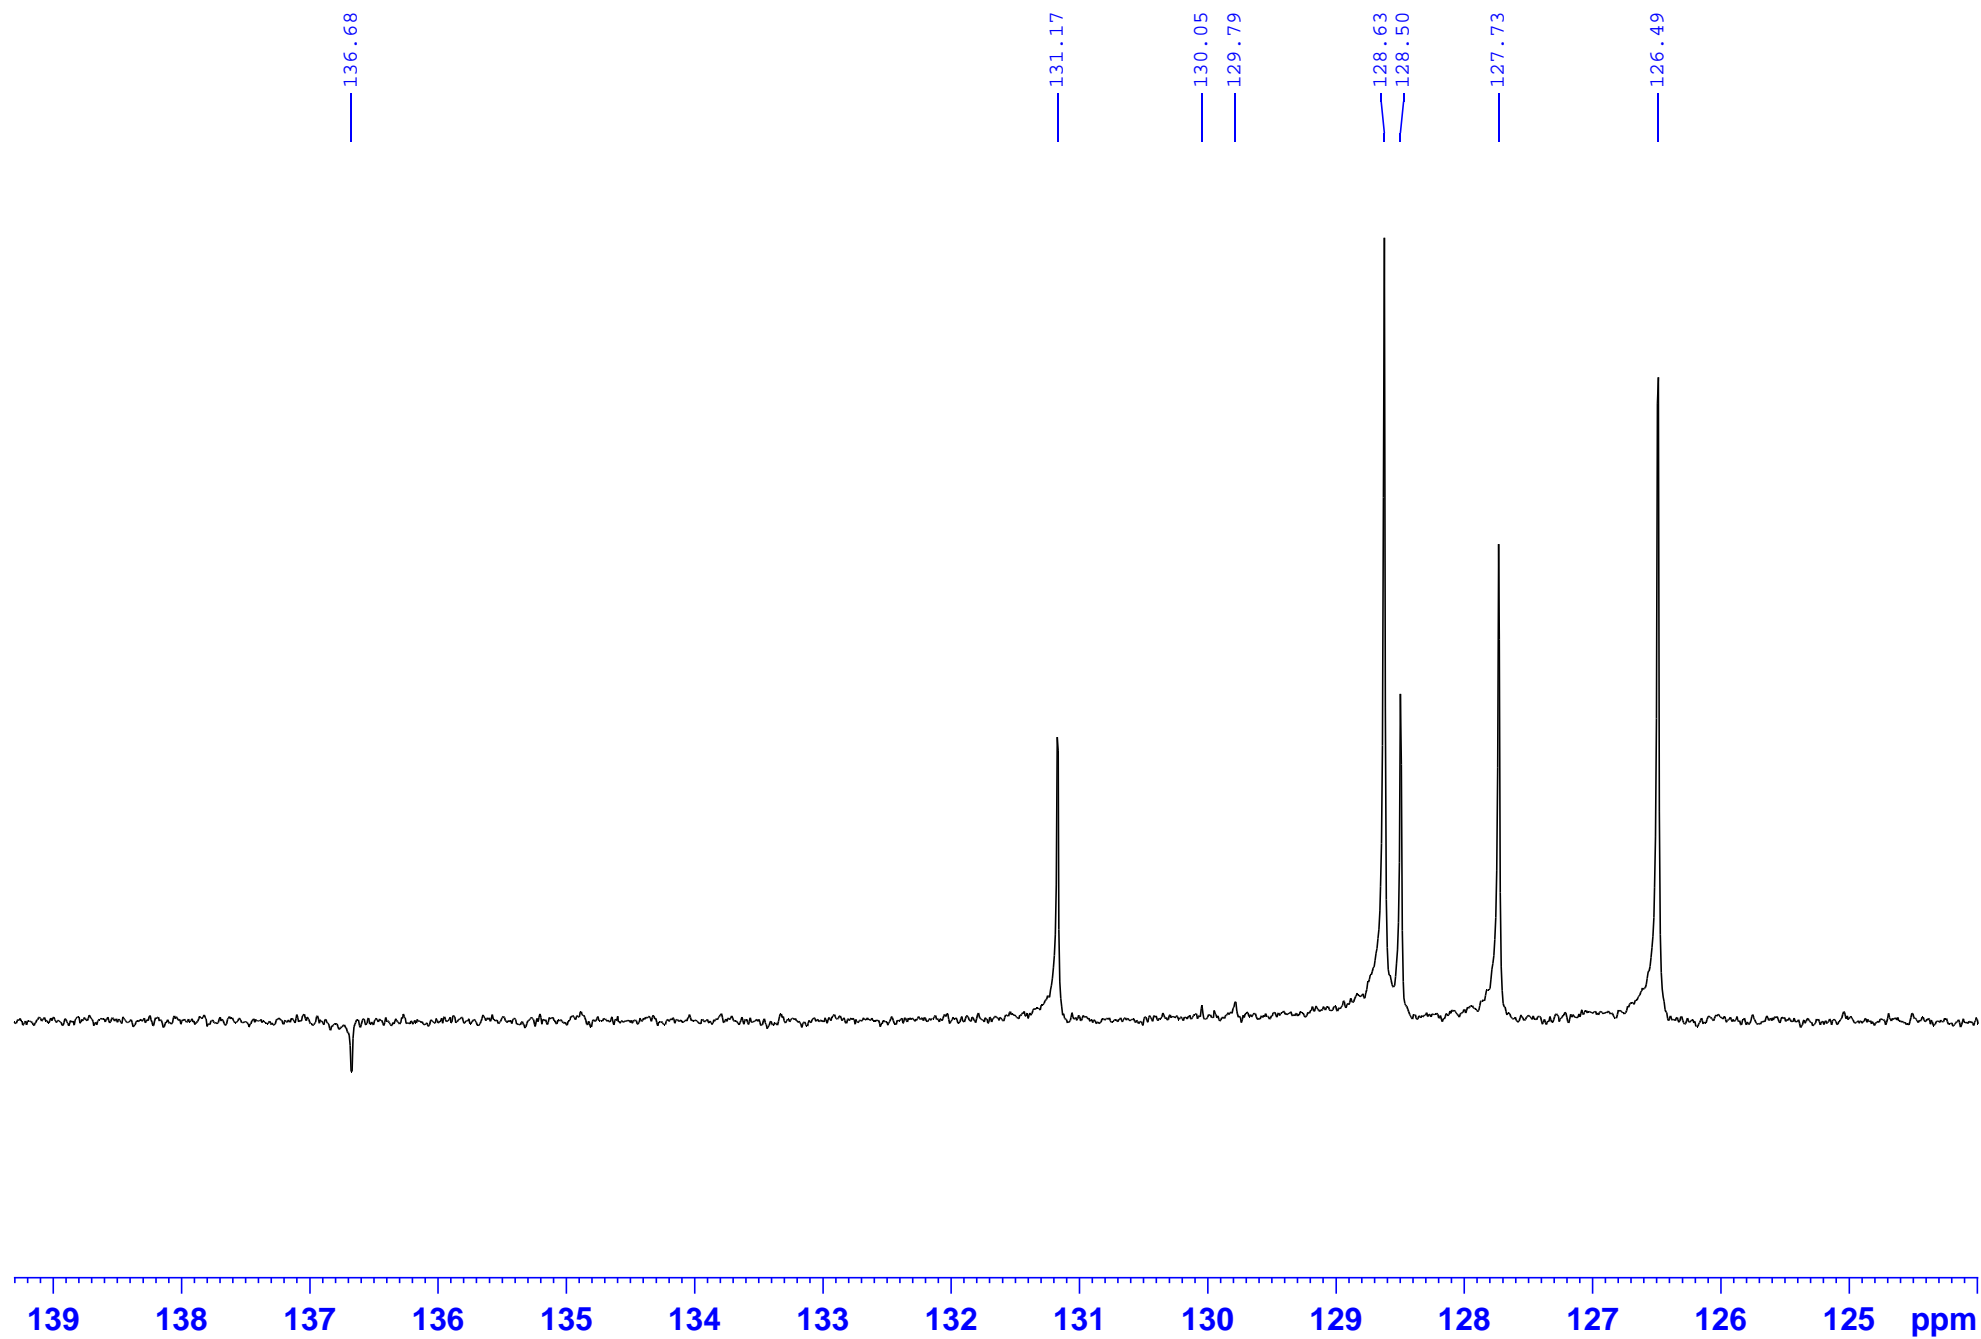

Hadeer Elkharasawy-CM5-APT-AF

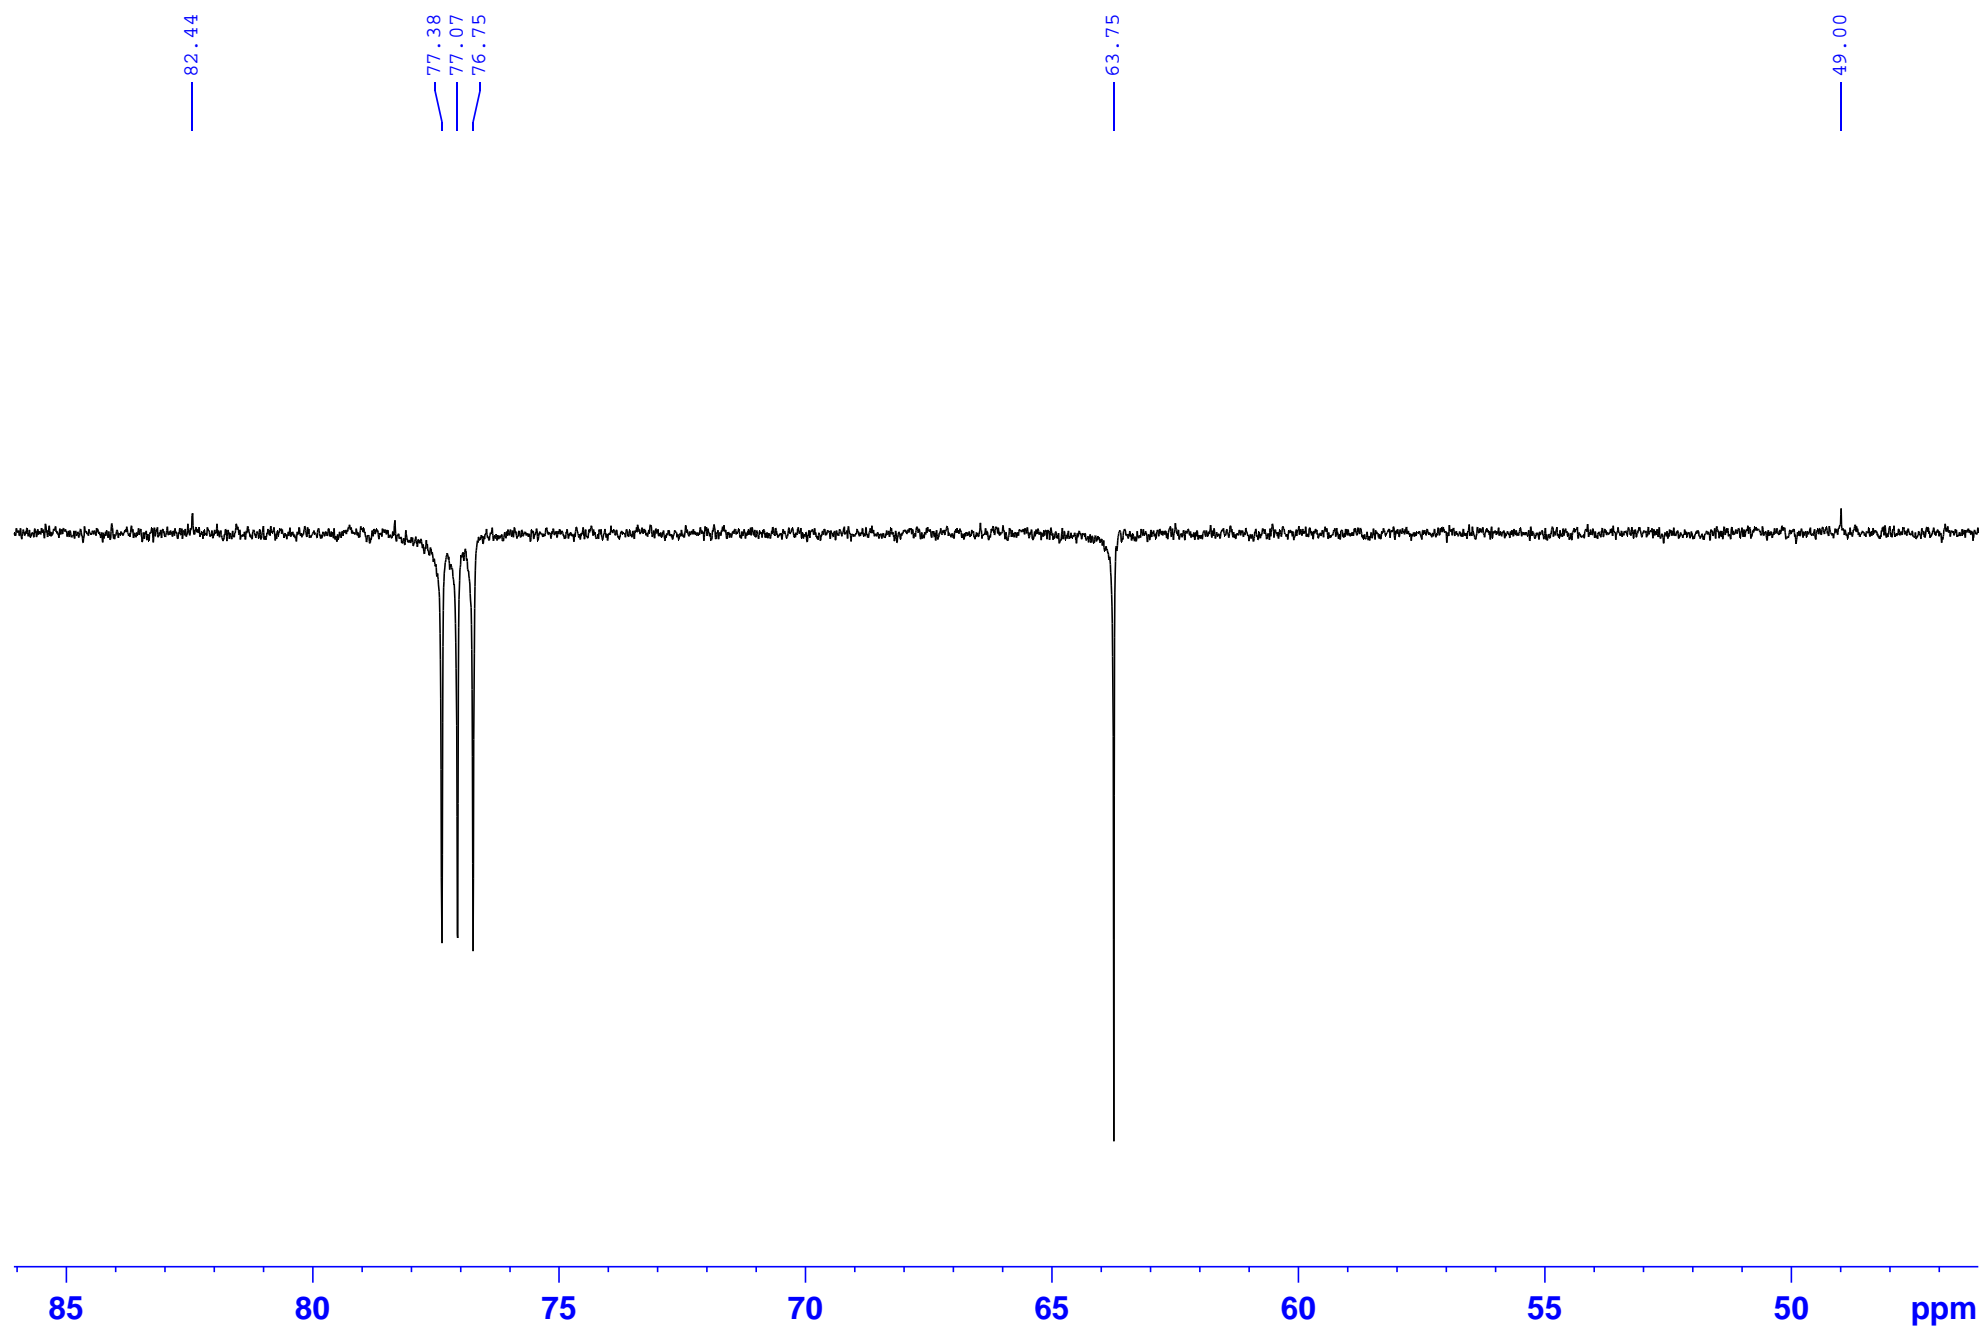

Hadeer Elkhawasawy-CM5-APT-AF

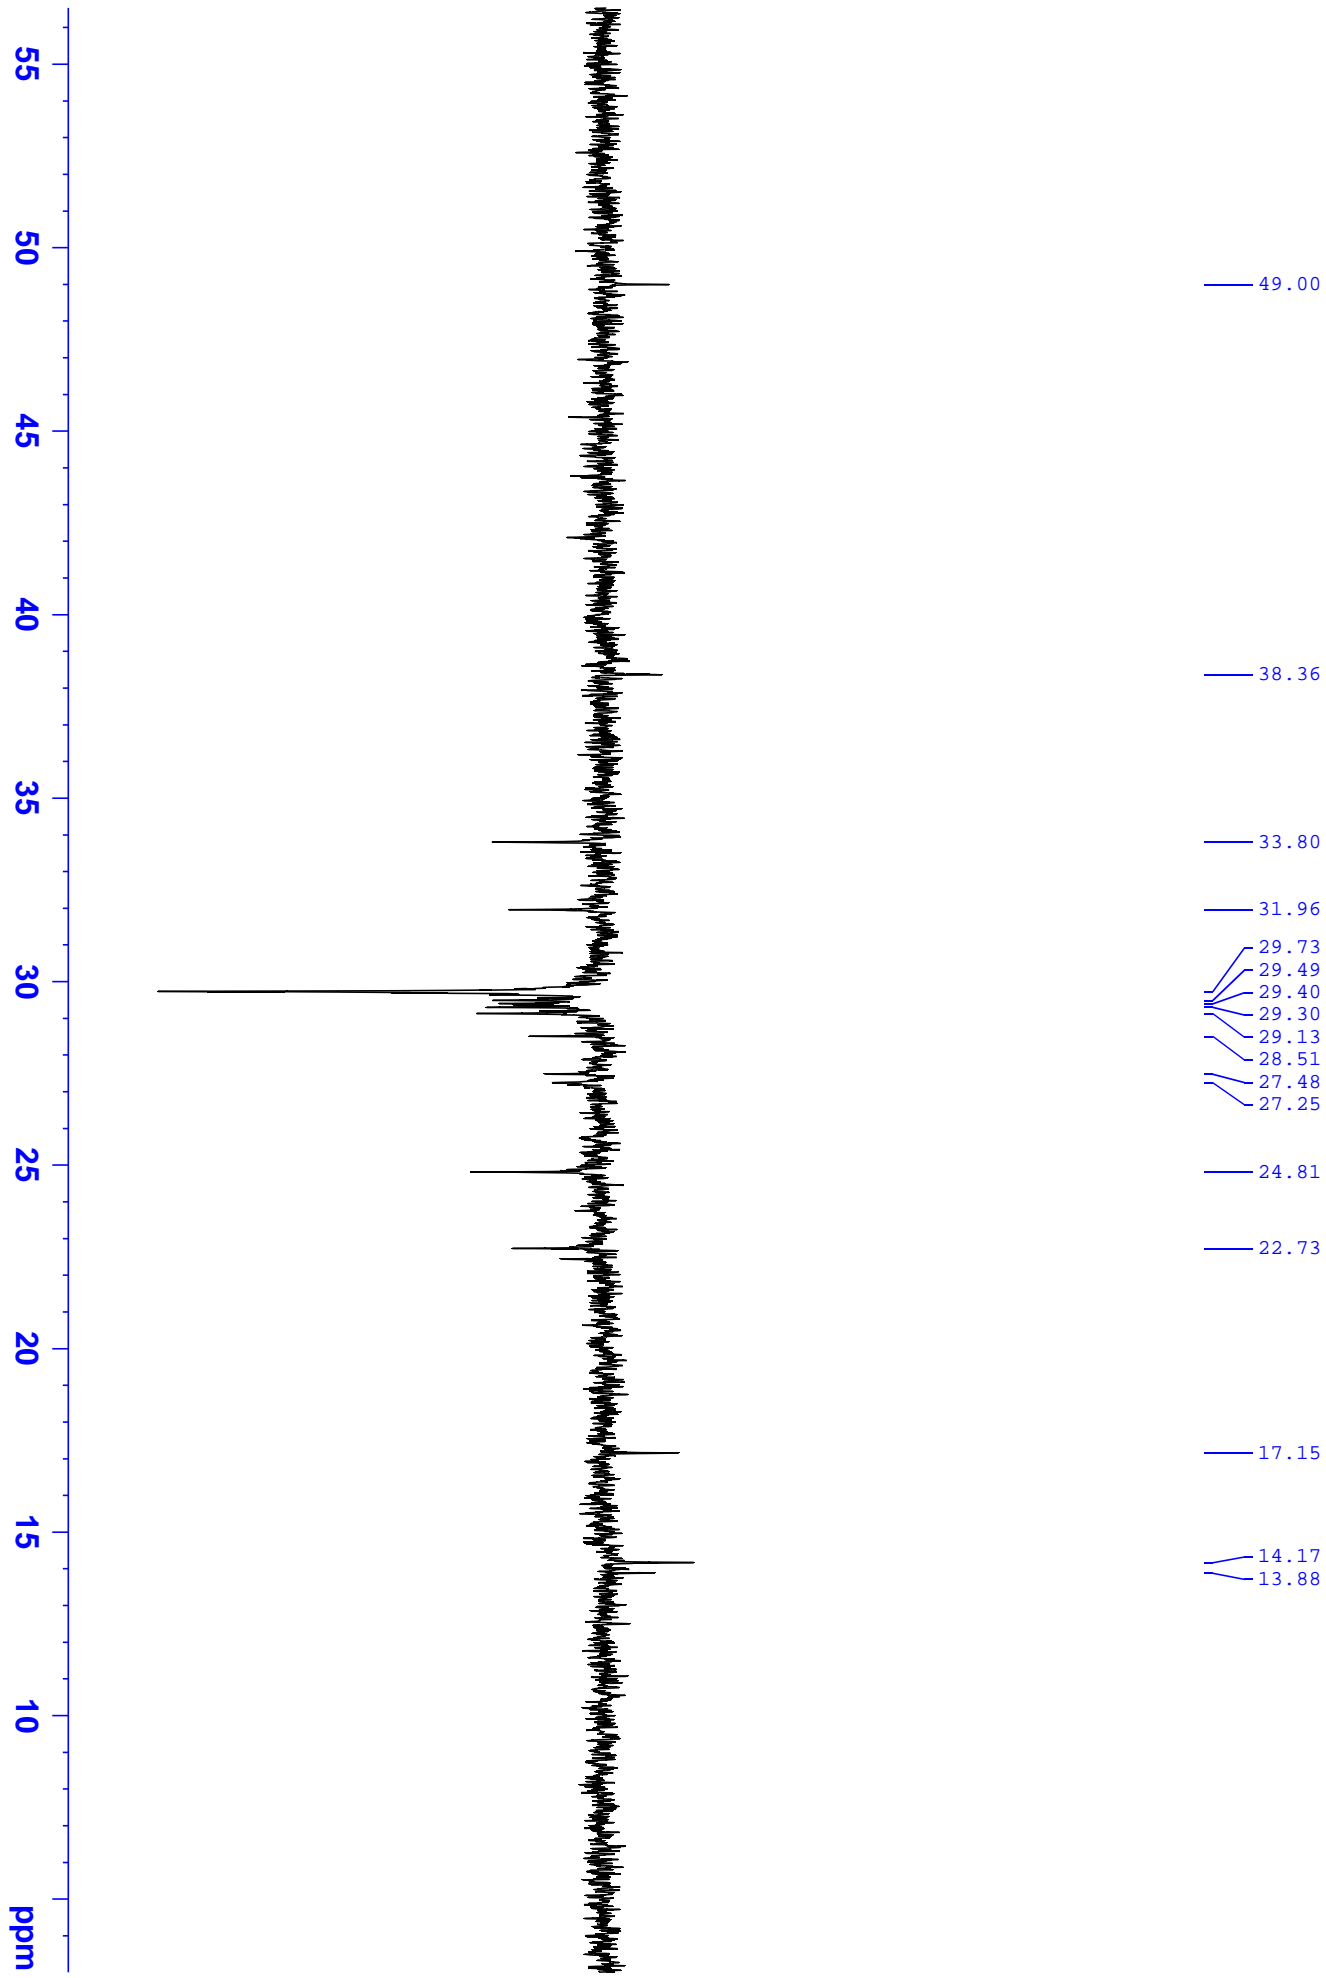

Hadeer elkhraawy-CM5-CDCL3-AF

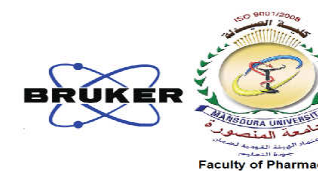

Current Data Parameters  
 NAME Hadeer elkhraawy-CM5-CDCL3-AF  
 EXPNO 10  
 PROCNO 1

F2 - Acquisition Parameters  
 Date\_ 20211024  
 Time 4.55 h  
 INSTRUM spect  
 PROBHD Z108618\_0945 (  
 PULPROG zg30  
 TD 65536  
 SOLVENT CDCL3  
 NS 70  
 DS 2  
 SWH 8012.820 Hz  
 FIDRES 0.244532 Hz  
 AQ 4.0894465 sec  
 RG 176.72  
 DW 62.400 usec  
 DE 6.50 usec  
 TE 294.9 K  
 D1 1.00000000 sec  
 TD0 1  
 SFO1 400.2024712 MHz  
 NUC1 1H  
 P1 13.50 usec  
 PLW1 13.00000000 W

F2 - Processing parameters  
 SI 65536  
 SF 400.2000391 MHz  
 WDW EM  
 SSB 0  
 LB 0.30 Hz  
 GB 0  
 PC 1.00

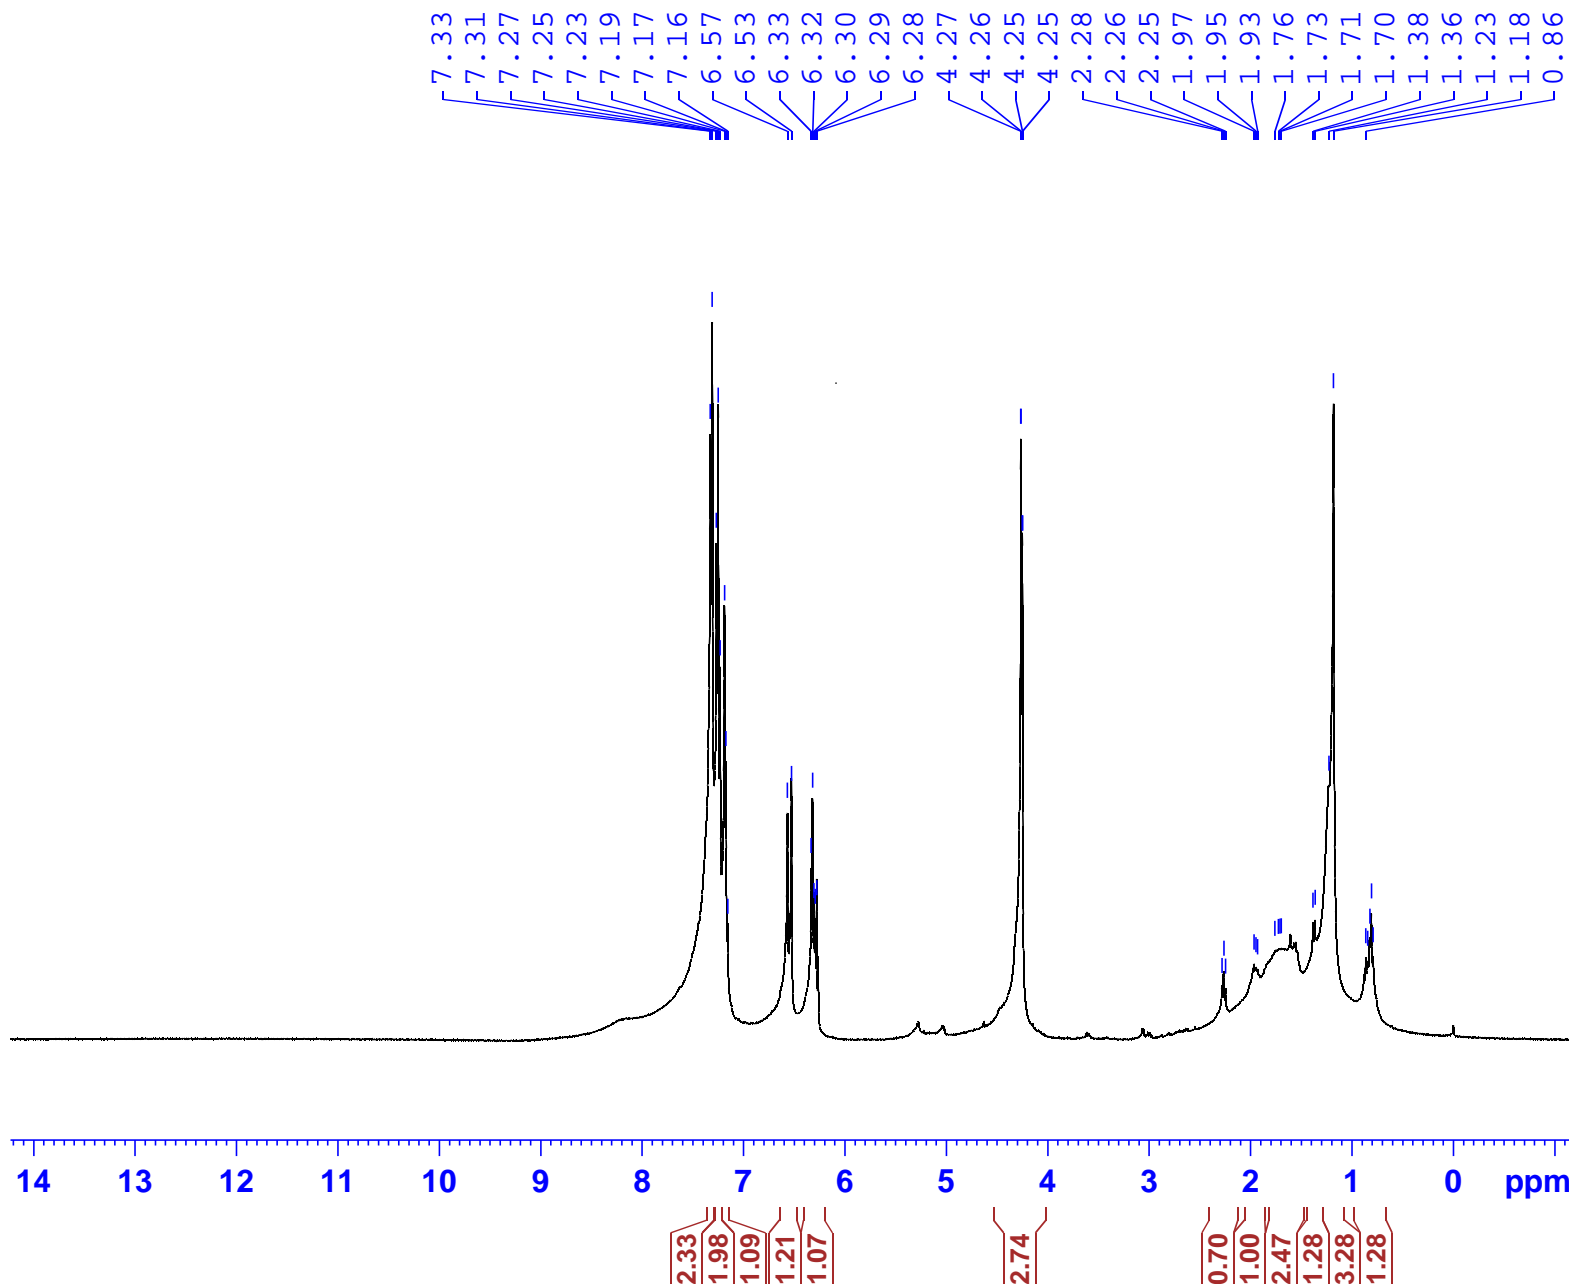

Hadeer elkhrasawy-CM5-CDCL3-AF

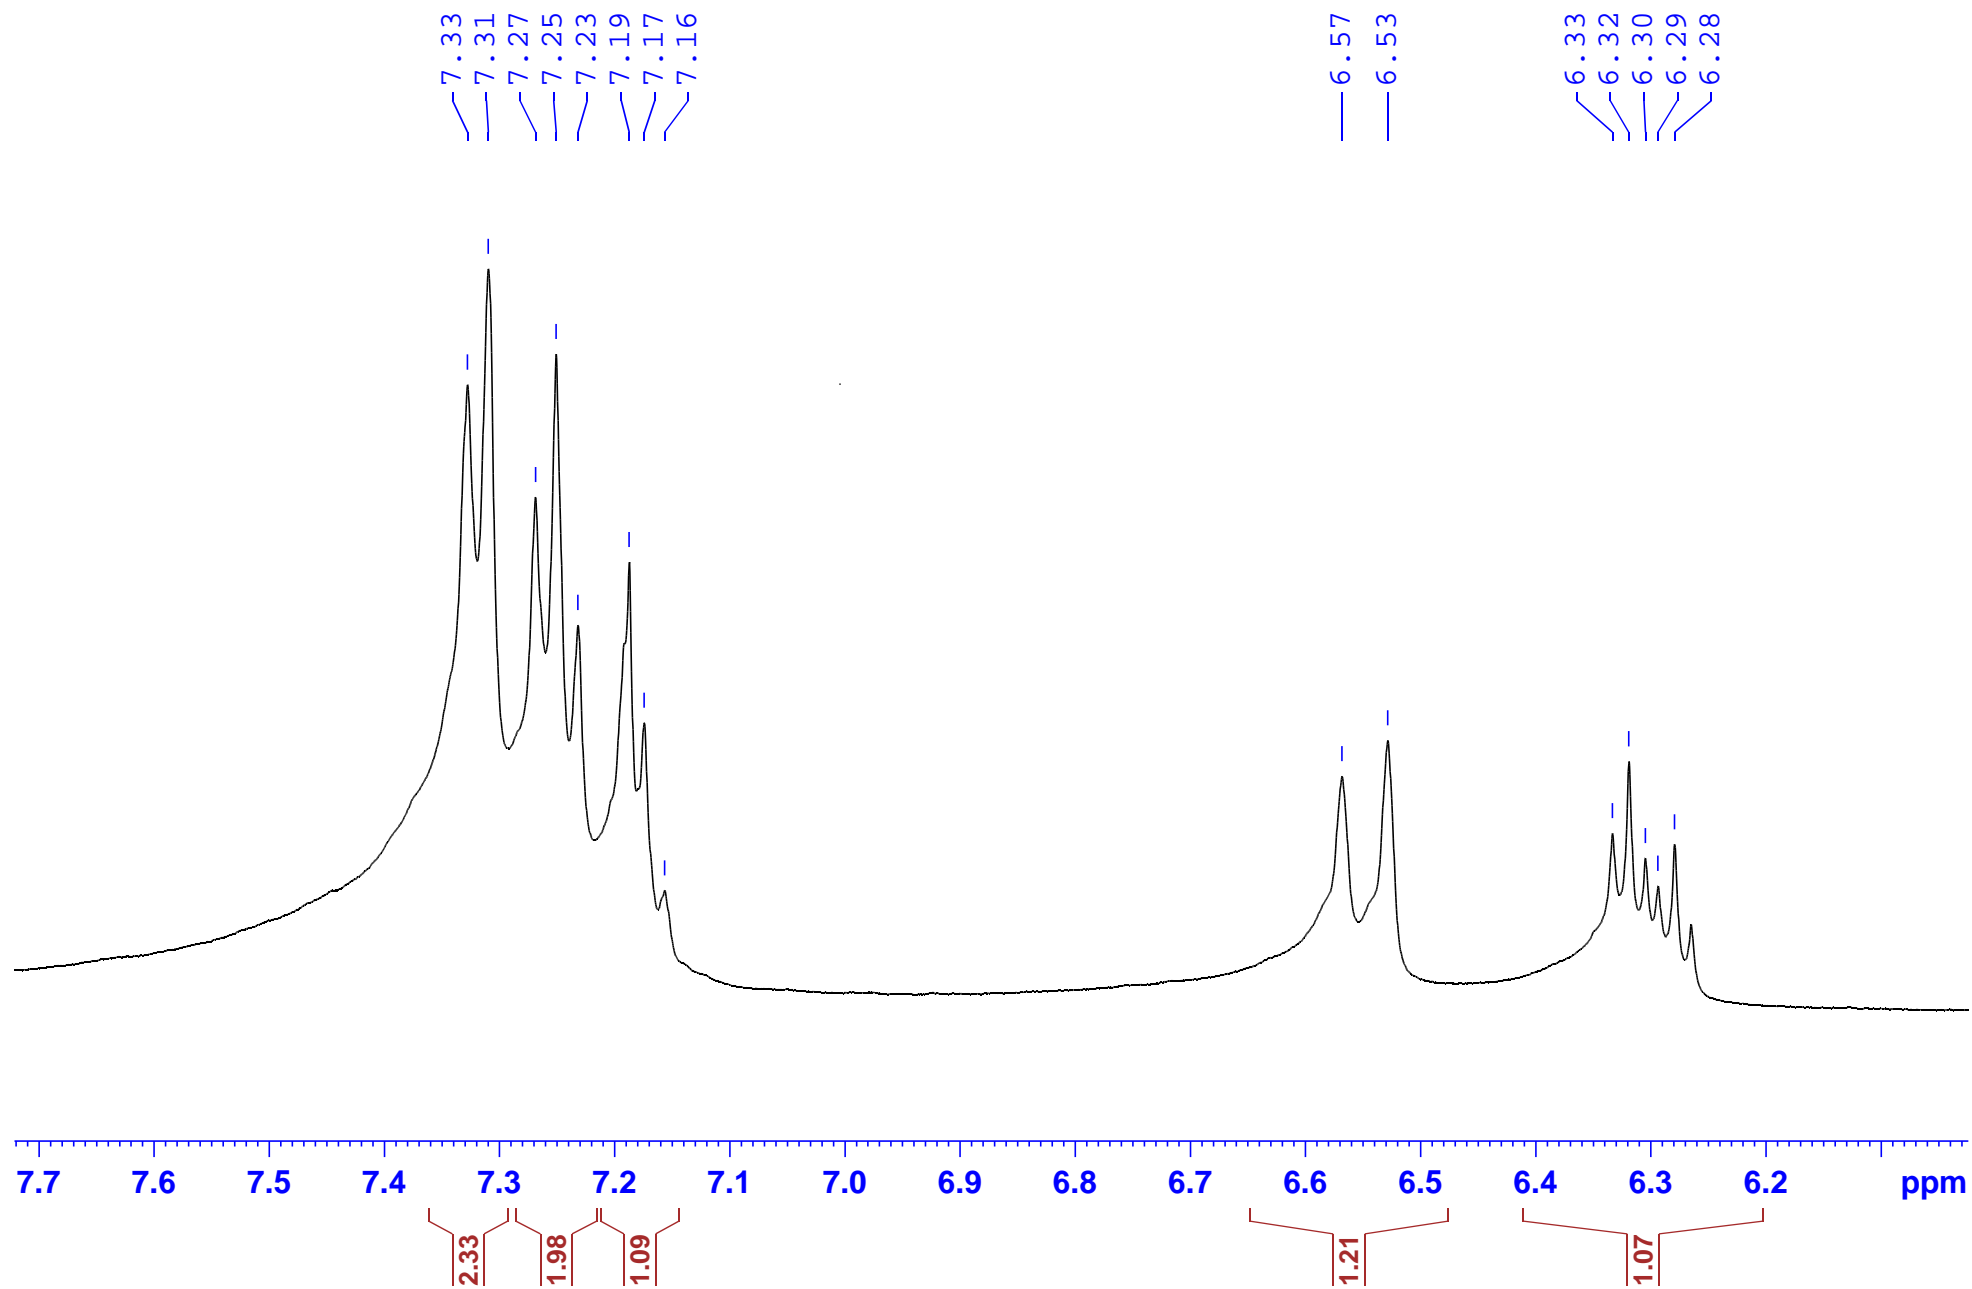

Hadeer elkhrasawy-CM5-CDCL3-AF

4.27  
4.26  
4.25  
4.25

2.28  
2.26  
2.25

1.97  
1.95  
1.93

1.76  
1.73  
1.71  
1.70

1.38  
1.36  
1.23  
1.18

0.86  
0.85  
0.82  
0.81  
0.79

4.5  
4.0  
2.74

2.5  
2.0  
0.70  
1.00

1.5  
1.28  
2.47  
3.28

1.0  
1.28  
ppm

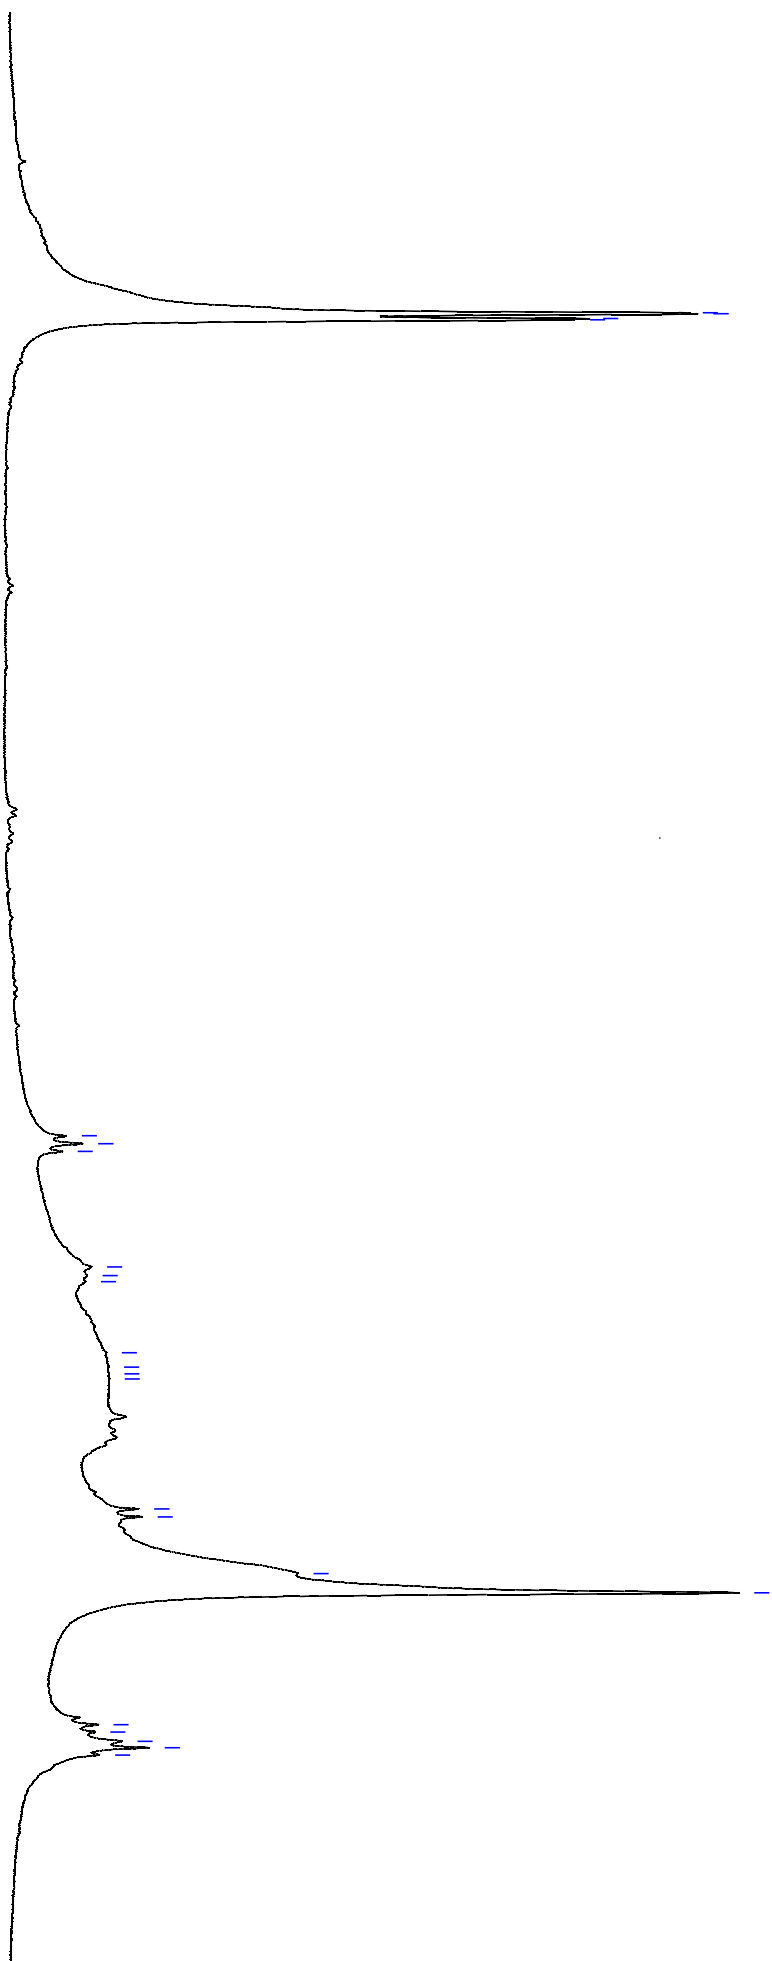

Supplement: d3fo04802k1.zip [file d3fo04802k1.zip]
