# Supplementary material for: New neuroprotective derivatives of cinnamic acid by biotransformation
Source: Royal Society of Chemistry journal article supplement (doi:10.1039/d3fo04802k), 2024-01-01

# Hadeer elharasawy-CM2-APT-AF

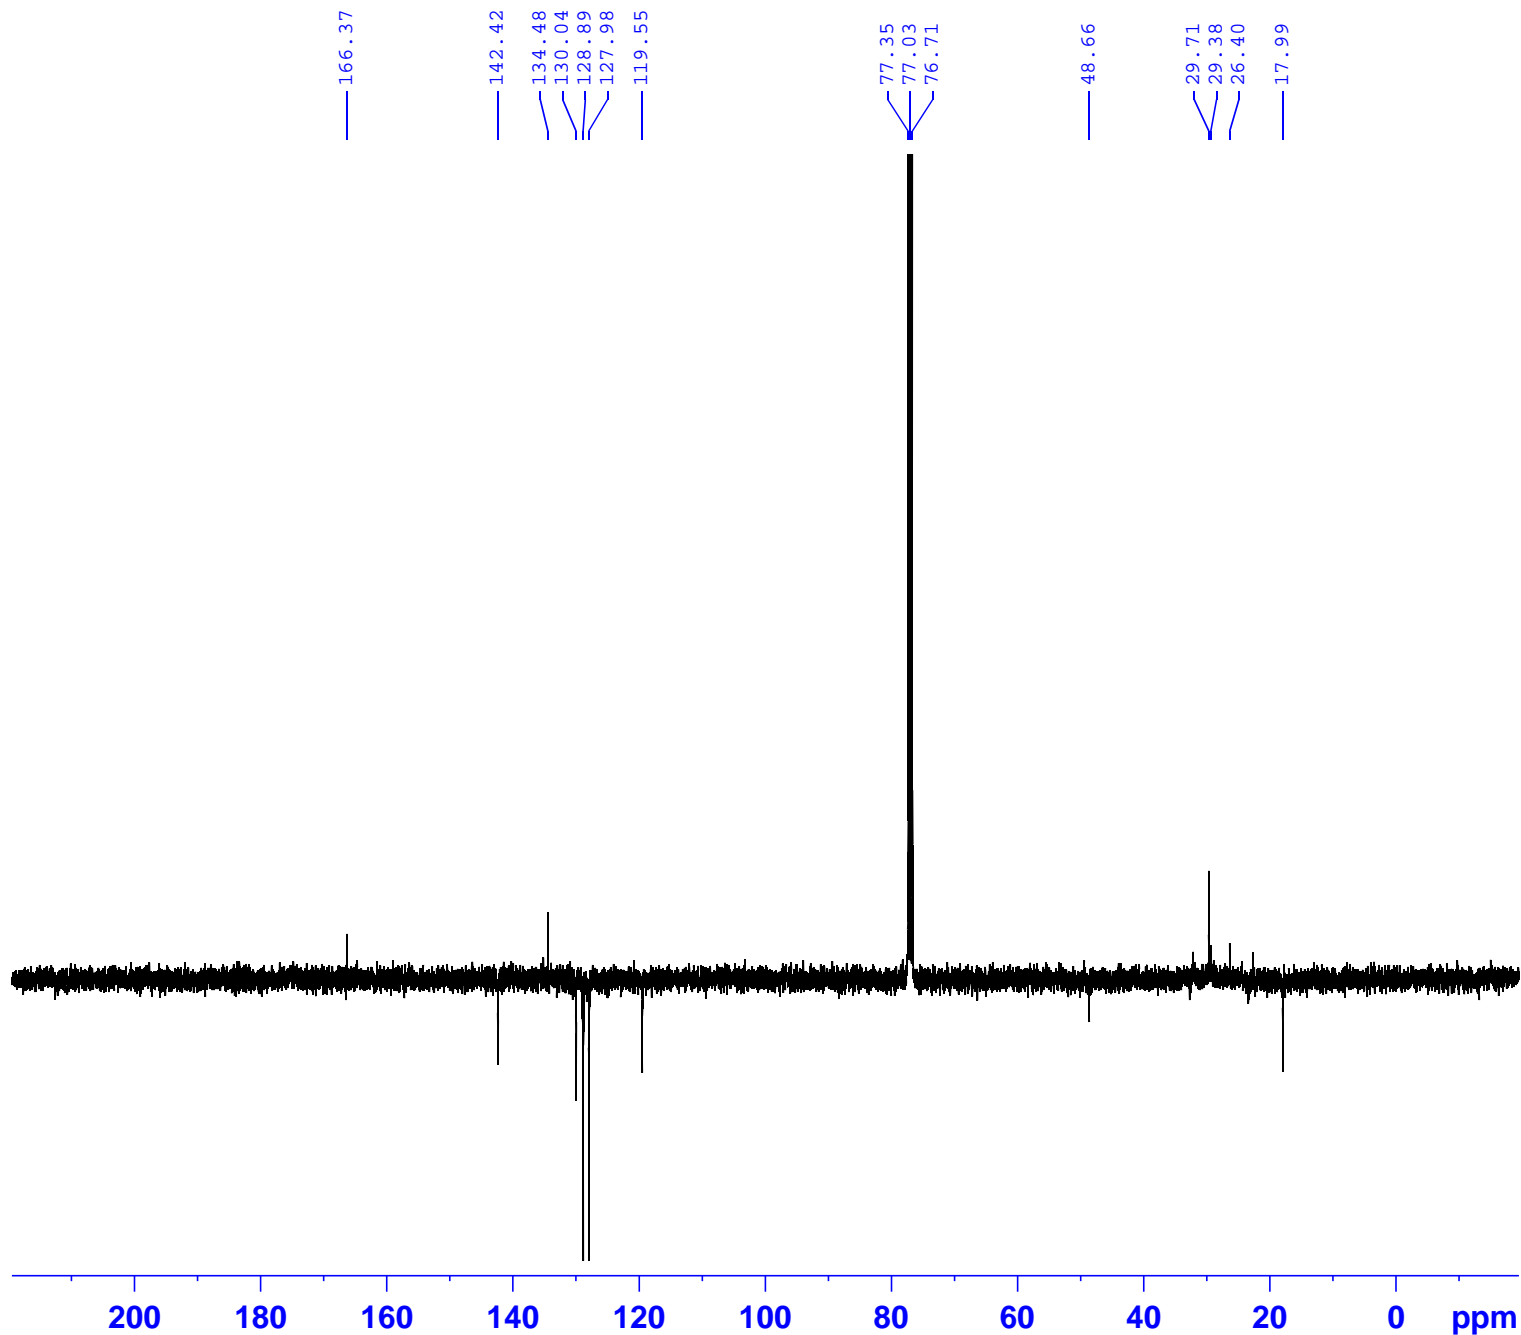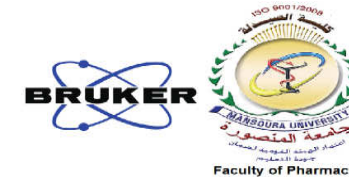

Current Data Parameters  
NAME Hadeer elharasawy-CM2-APT-AF  
EXPNO 10  
PROCNO 1

F2 - Acquisition Parameters  
Date\_ 20211003  
Time 10.50 h  
INSTRUM spect  
PROBHD Z108618\_0945 (   
PULPROG jmod  
TD 65536  
SOLVENT CDCl3  
NS 2800  
DS 4  
SWH 24038.461 Hz  
FIDRES 0.733596 Hz  
AQ 1.3631488 sec  
RG 197.77  
DW 20.800 usec  
DE 6.50 usec  
TE 295.6 K  
CNST2 145.0000000  
CNST11 1.0000000  
D1 2.00000000 sec  
D20 0.00689655 sec  
TD0 1  
SF01 100.6404331 MHz  
NUC1 13C  
P1 10.00 usec  
P2 20.00 usec  
PLW1 47.00000000 W  
SF02 400.2016008 MHz  
NUC2 1H  
CPDPRG[2] waltz16  
PCPD2 90.00 usec  
PLW2 13.00000000 W  
PLW12 0.29249999 W

F2 - Processing parameters  
SI 32768  
SF 100.6303700 MHz  
WDW EM  
SSB 0  
LB 1.00 Hz  
GB 0  
PC 1.40

Hadeer elharasawy-CM2-APT-AF

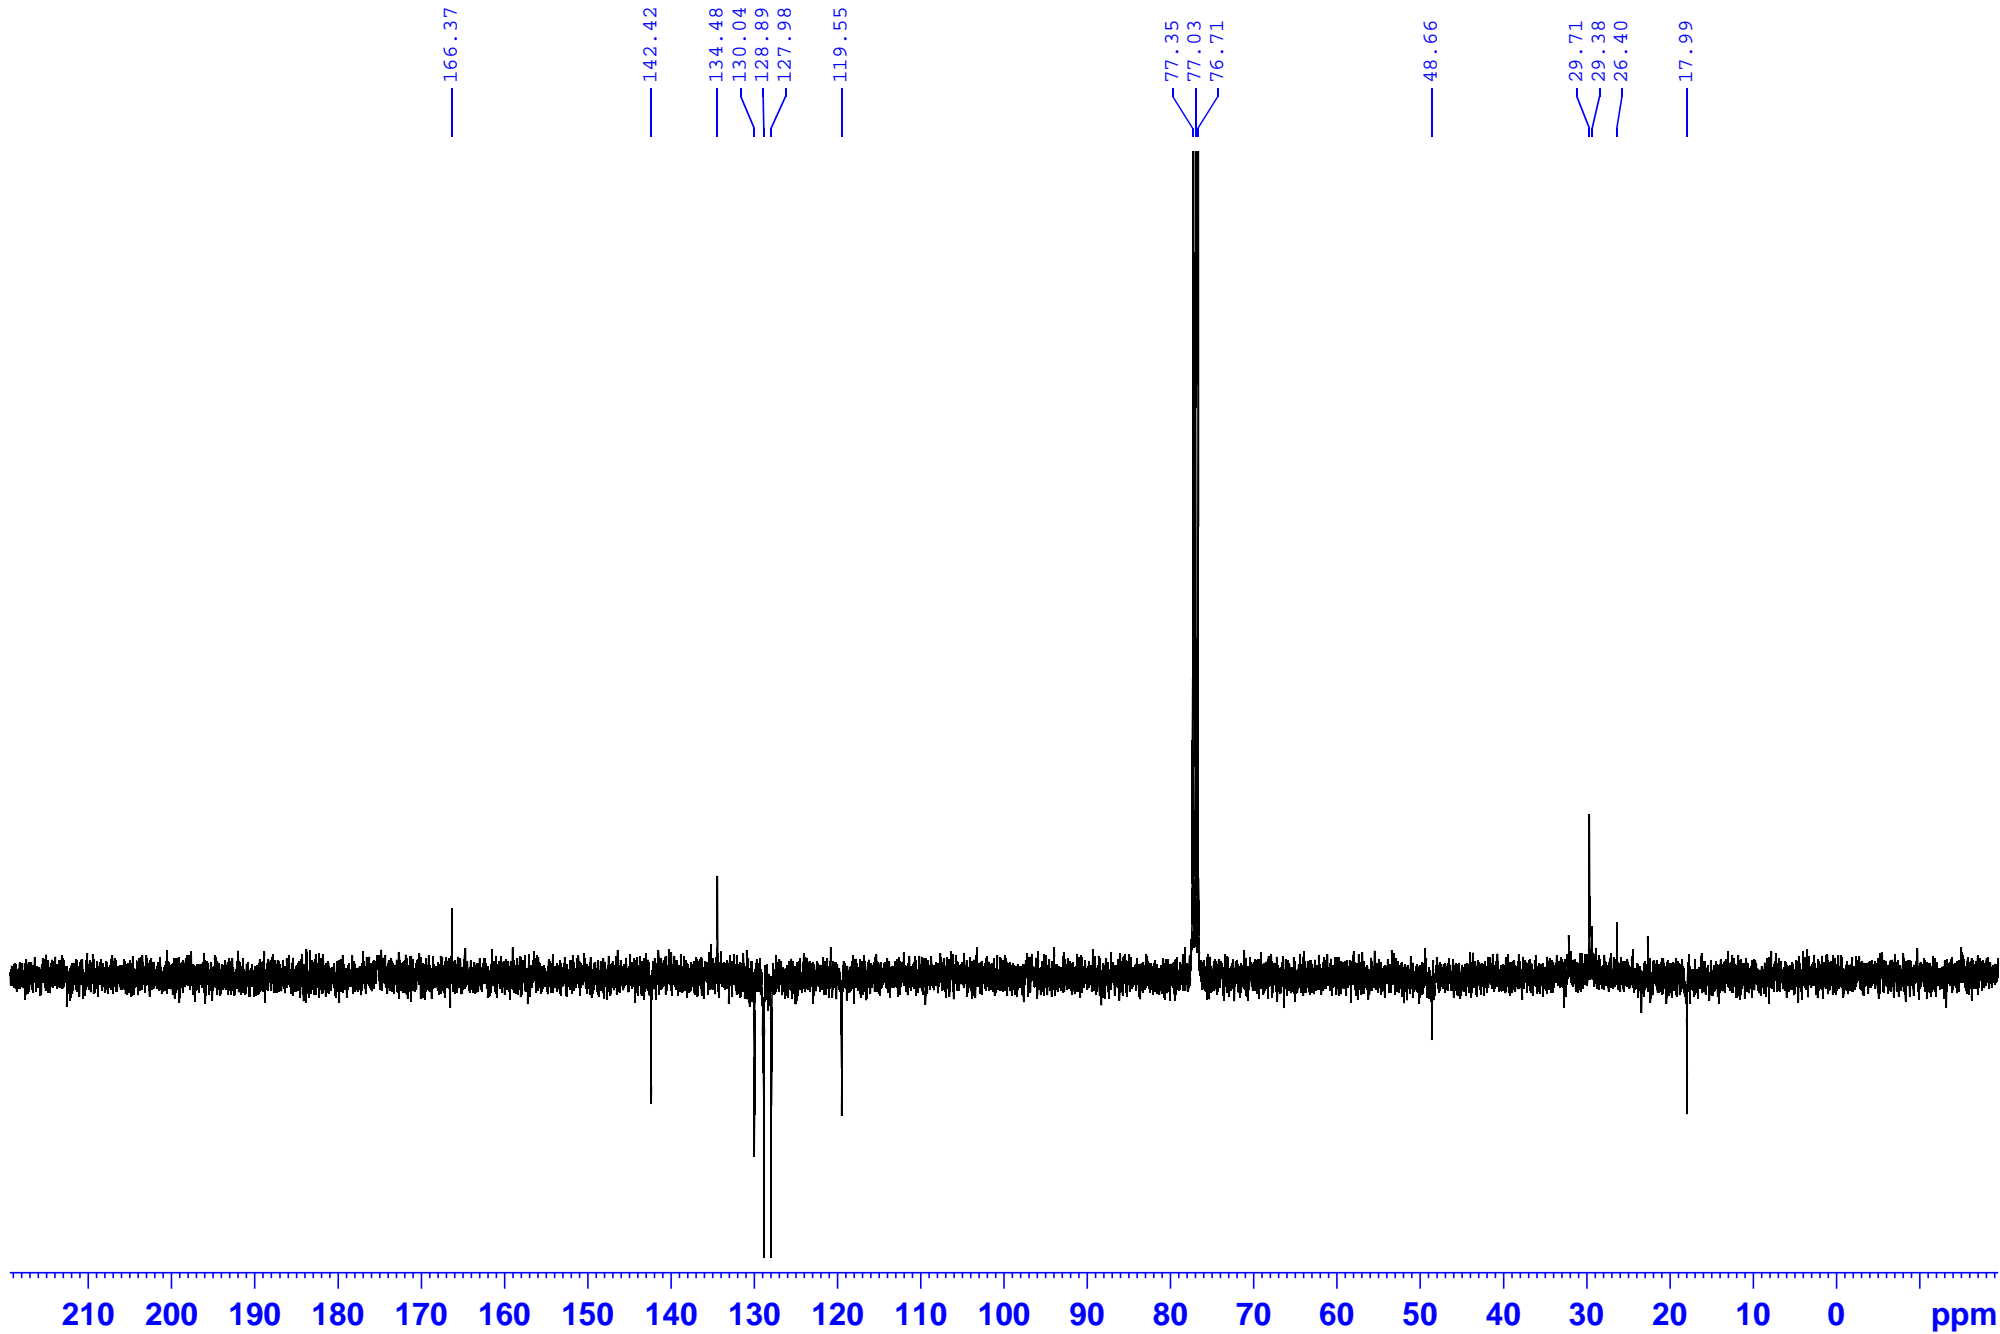

Hadeer elharasawy-CM2-APT-AF

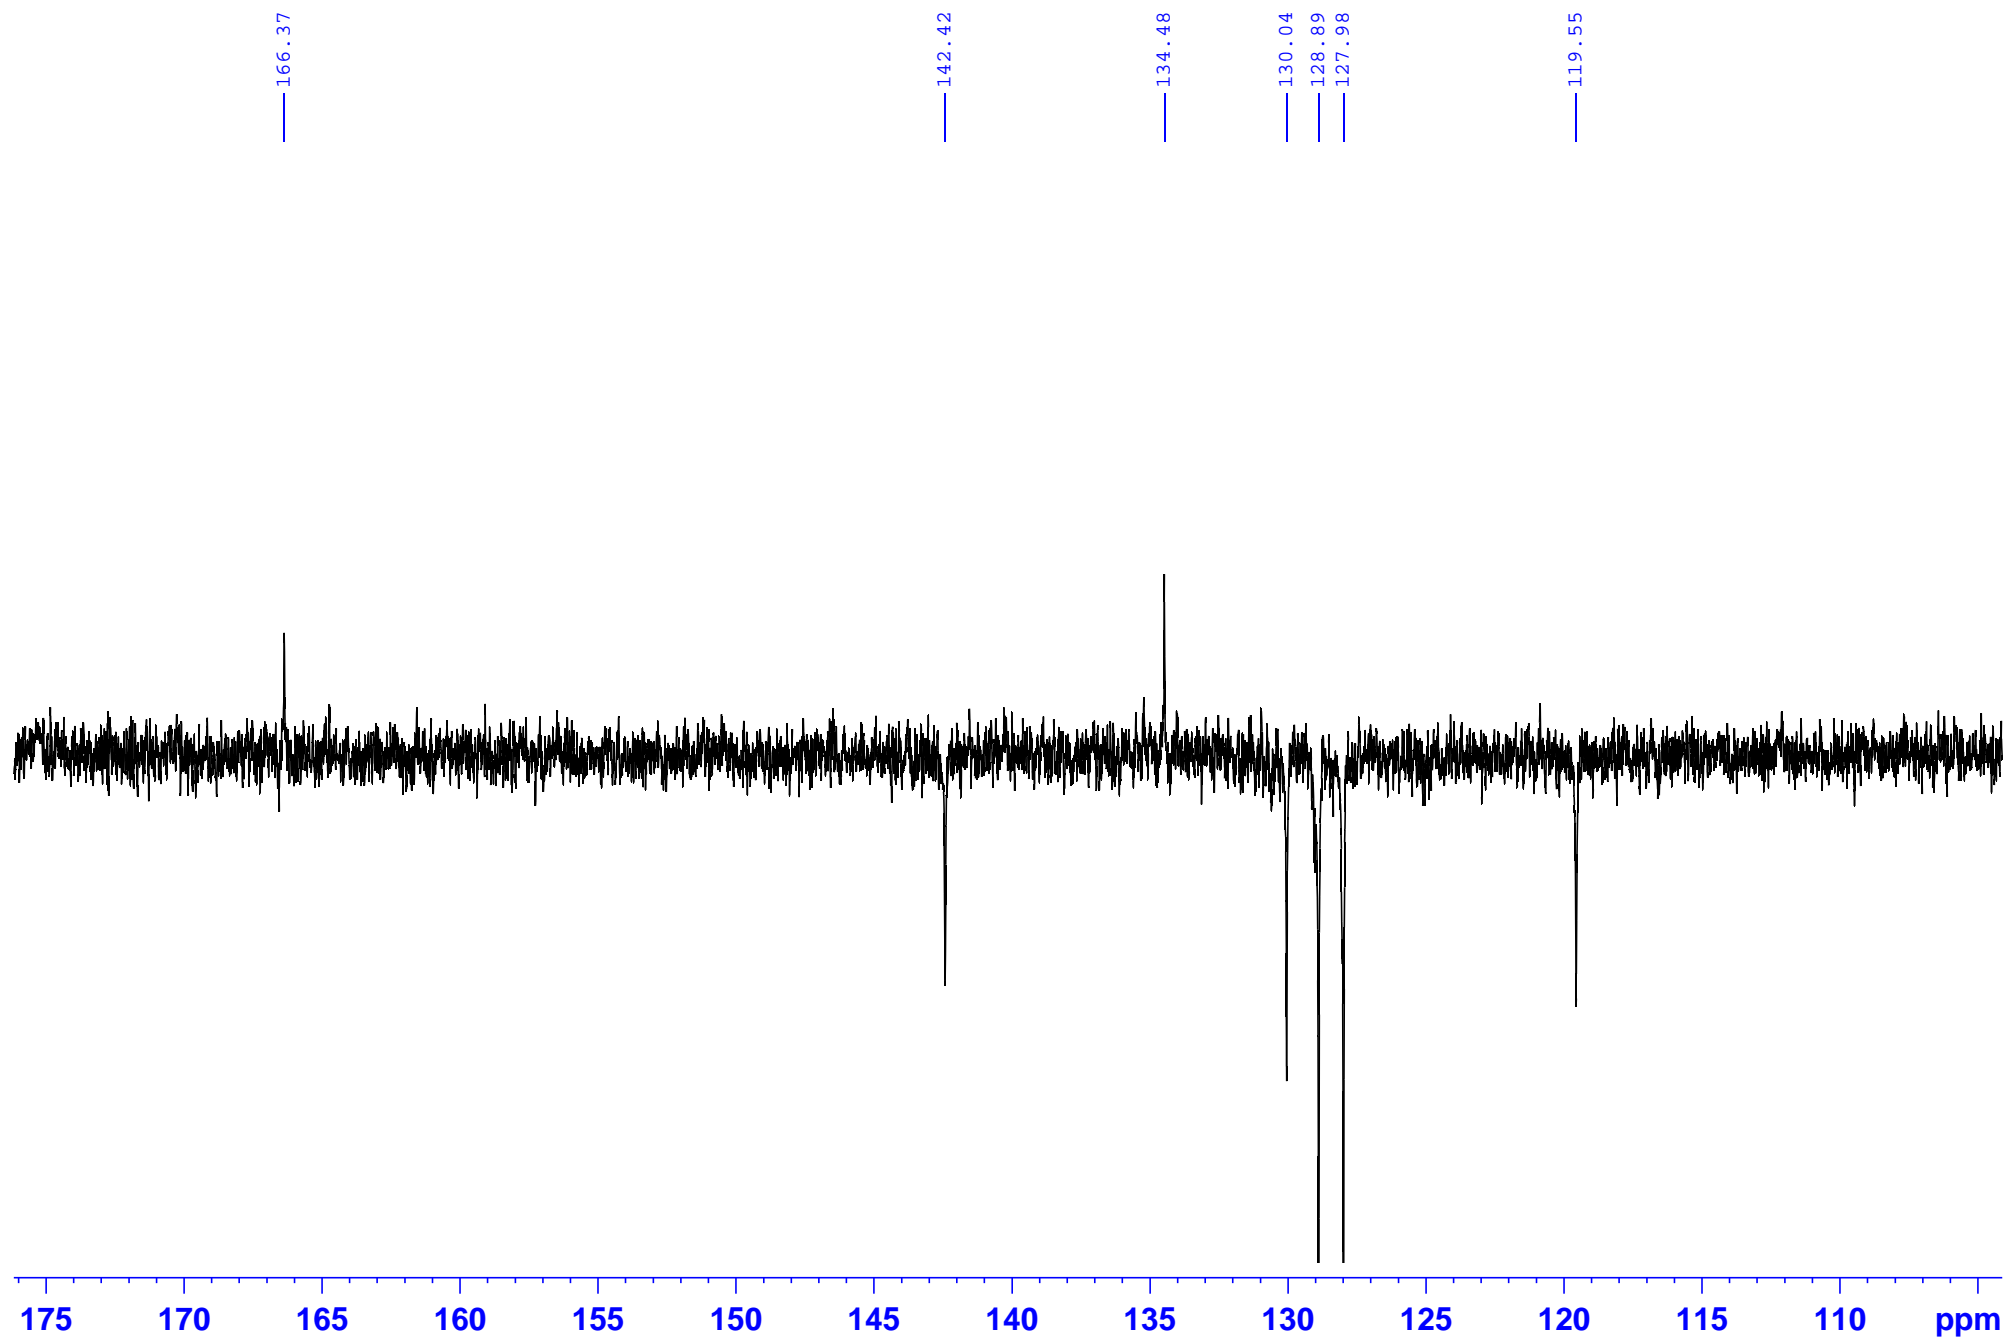

Hadeer elharasawy-CM2-APT-AF

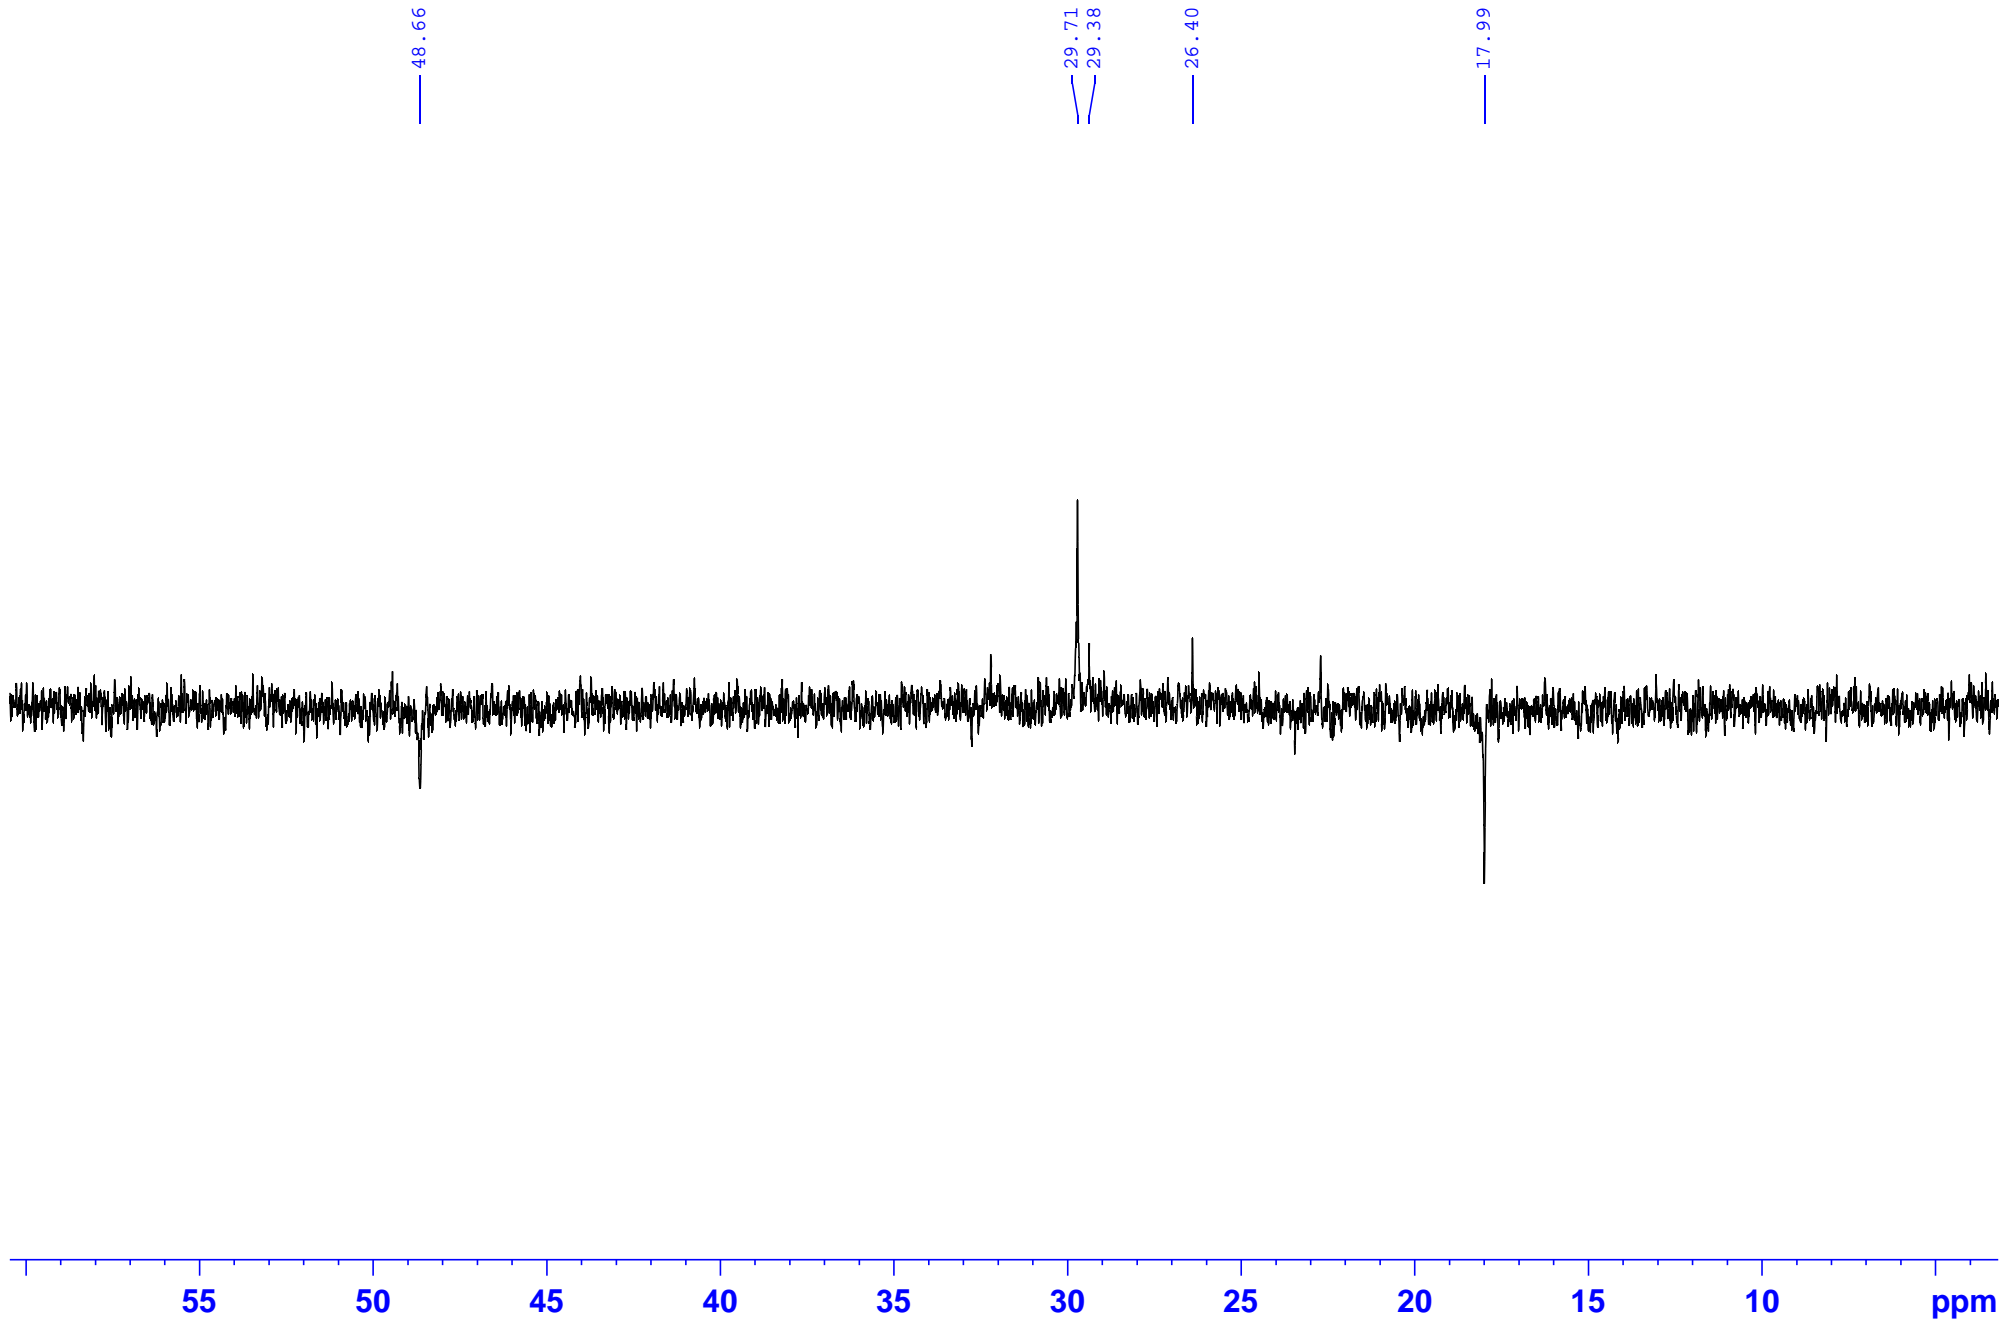

Hadeer ElKharasawy - CM-2 again - Hnmr - T

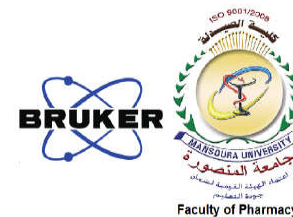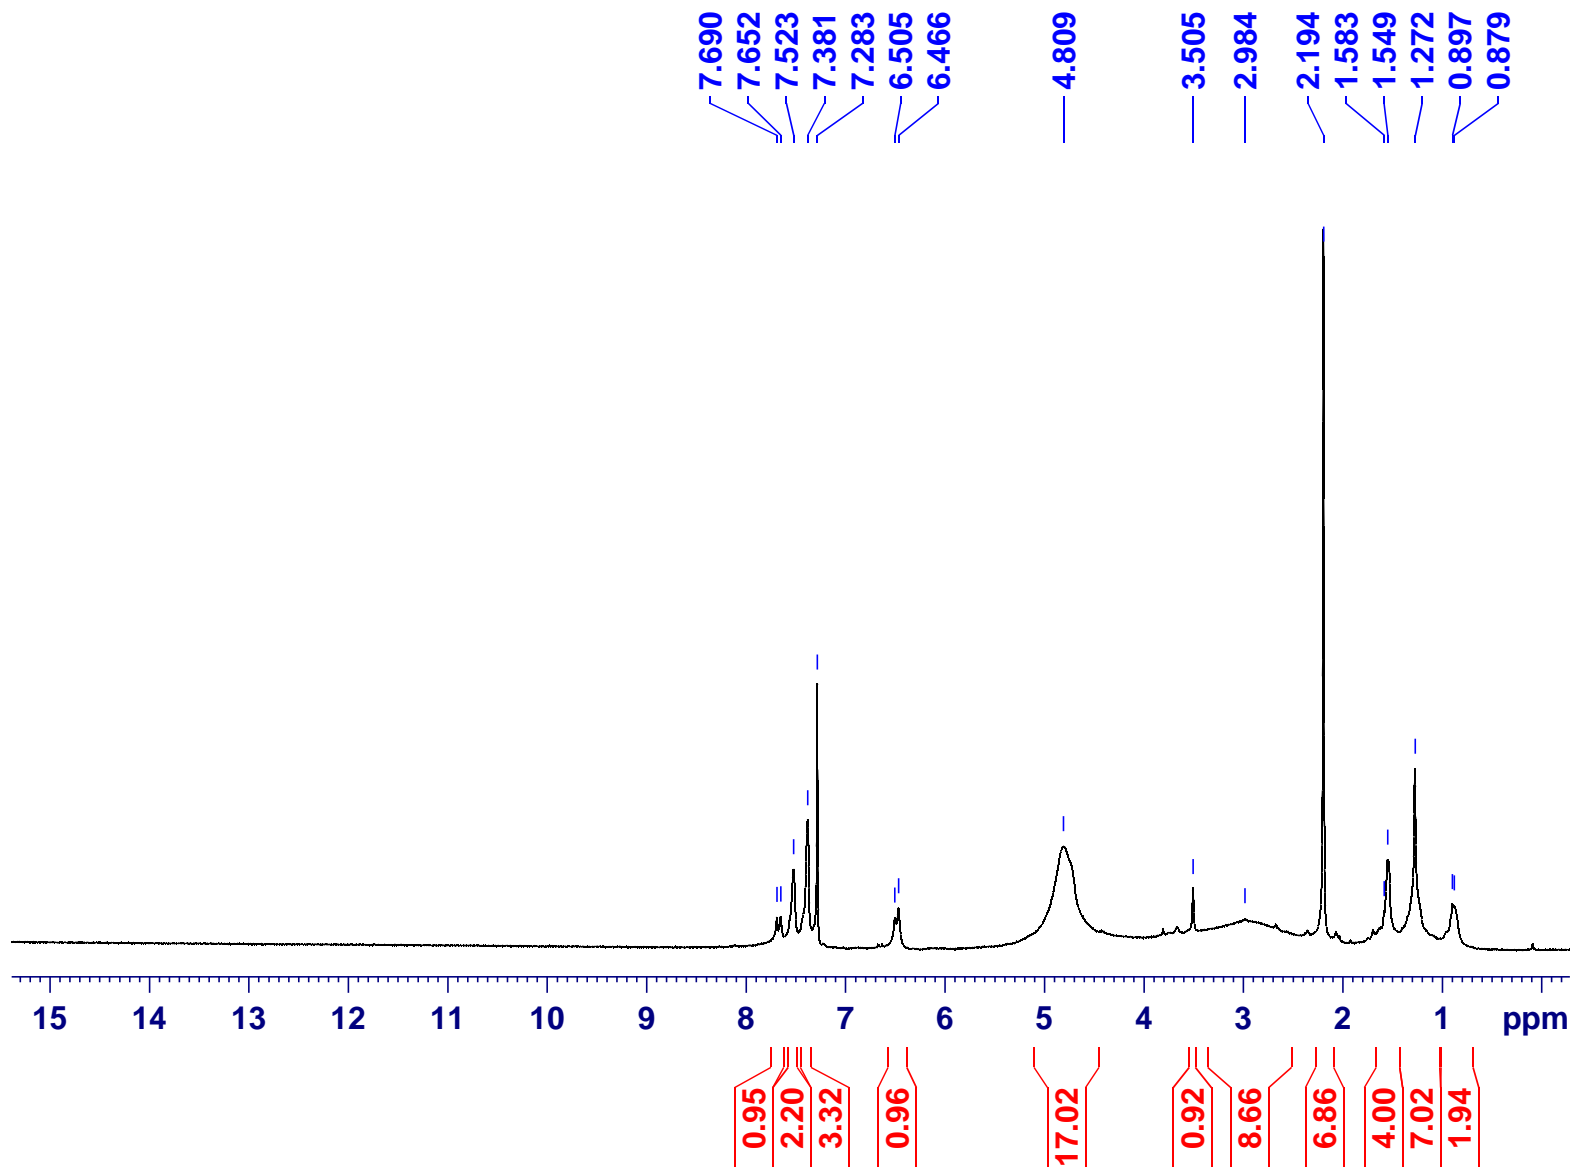

Current Data Parameters  
NAME Hadeer ElKharasawy - CM-2 again - Hnmr - T  
EXPNO 10  
PROCNO 1

F2 - Acquisition Parameters  
Date\_ 20220622  
Time 10.47 h  
INSTRUM spect  
PROBHD z108618\_0945  
PULPROG zg30  
TD 65536  
SOLVENT CDCl3  
DS 2  
SWH 8012.820 Hz  
FIDRES 0.244532 Hz  
AQ 4.0894465 sec  
RG 176.72  
DW 62.400 usec  
DE 6.50 usec  
TE 0 K  
D1 1.00000000 sec  
TD0 1  
SFO1 400.2024712 MHz  
NUC1 1H  
P1 13.50 usec  
PLW1 13.00000000 W

F2 - Processing parameters  
SI 65536  
SF 400.2000000 MHz  
WDW EM  
SSB 0  
LB 0.30 Hz  
GB 0  
PC 1.00

Hadeer ElKharasawy - CM-2 again - Hnmr - T

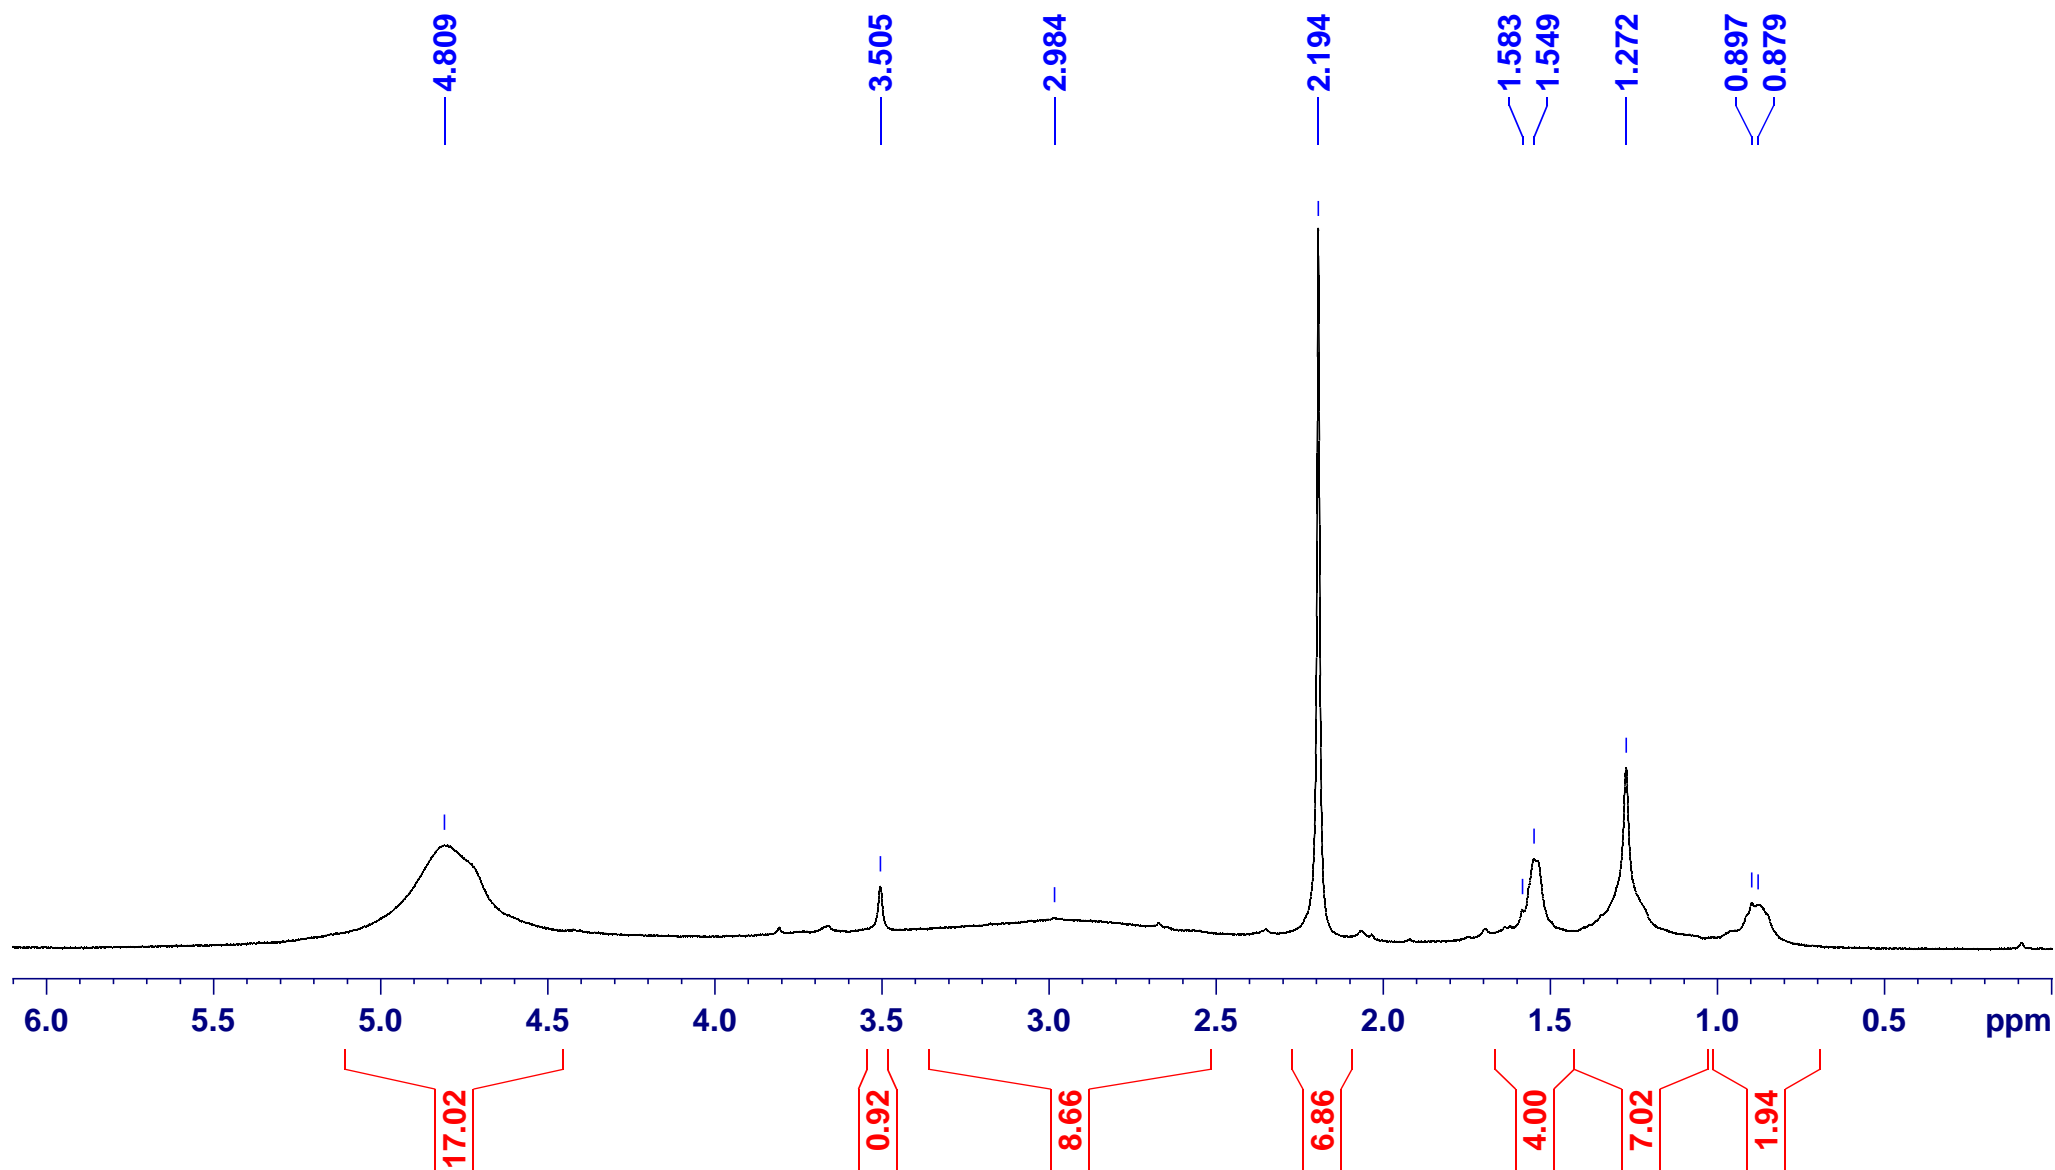

Hadeer ElKharasawy - CM-2 again - Hnmr - T

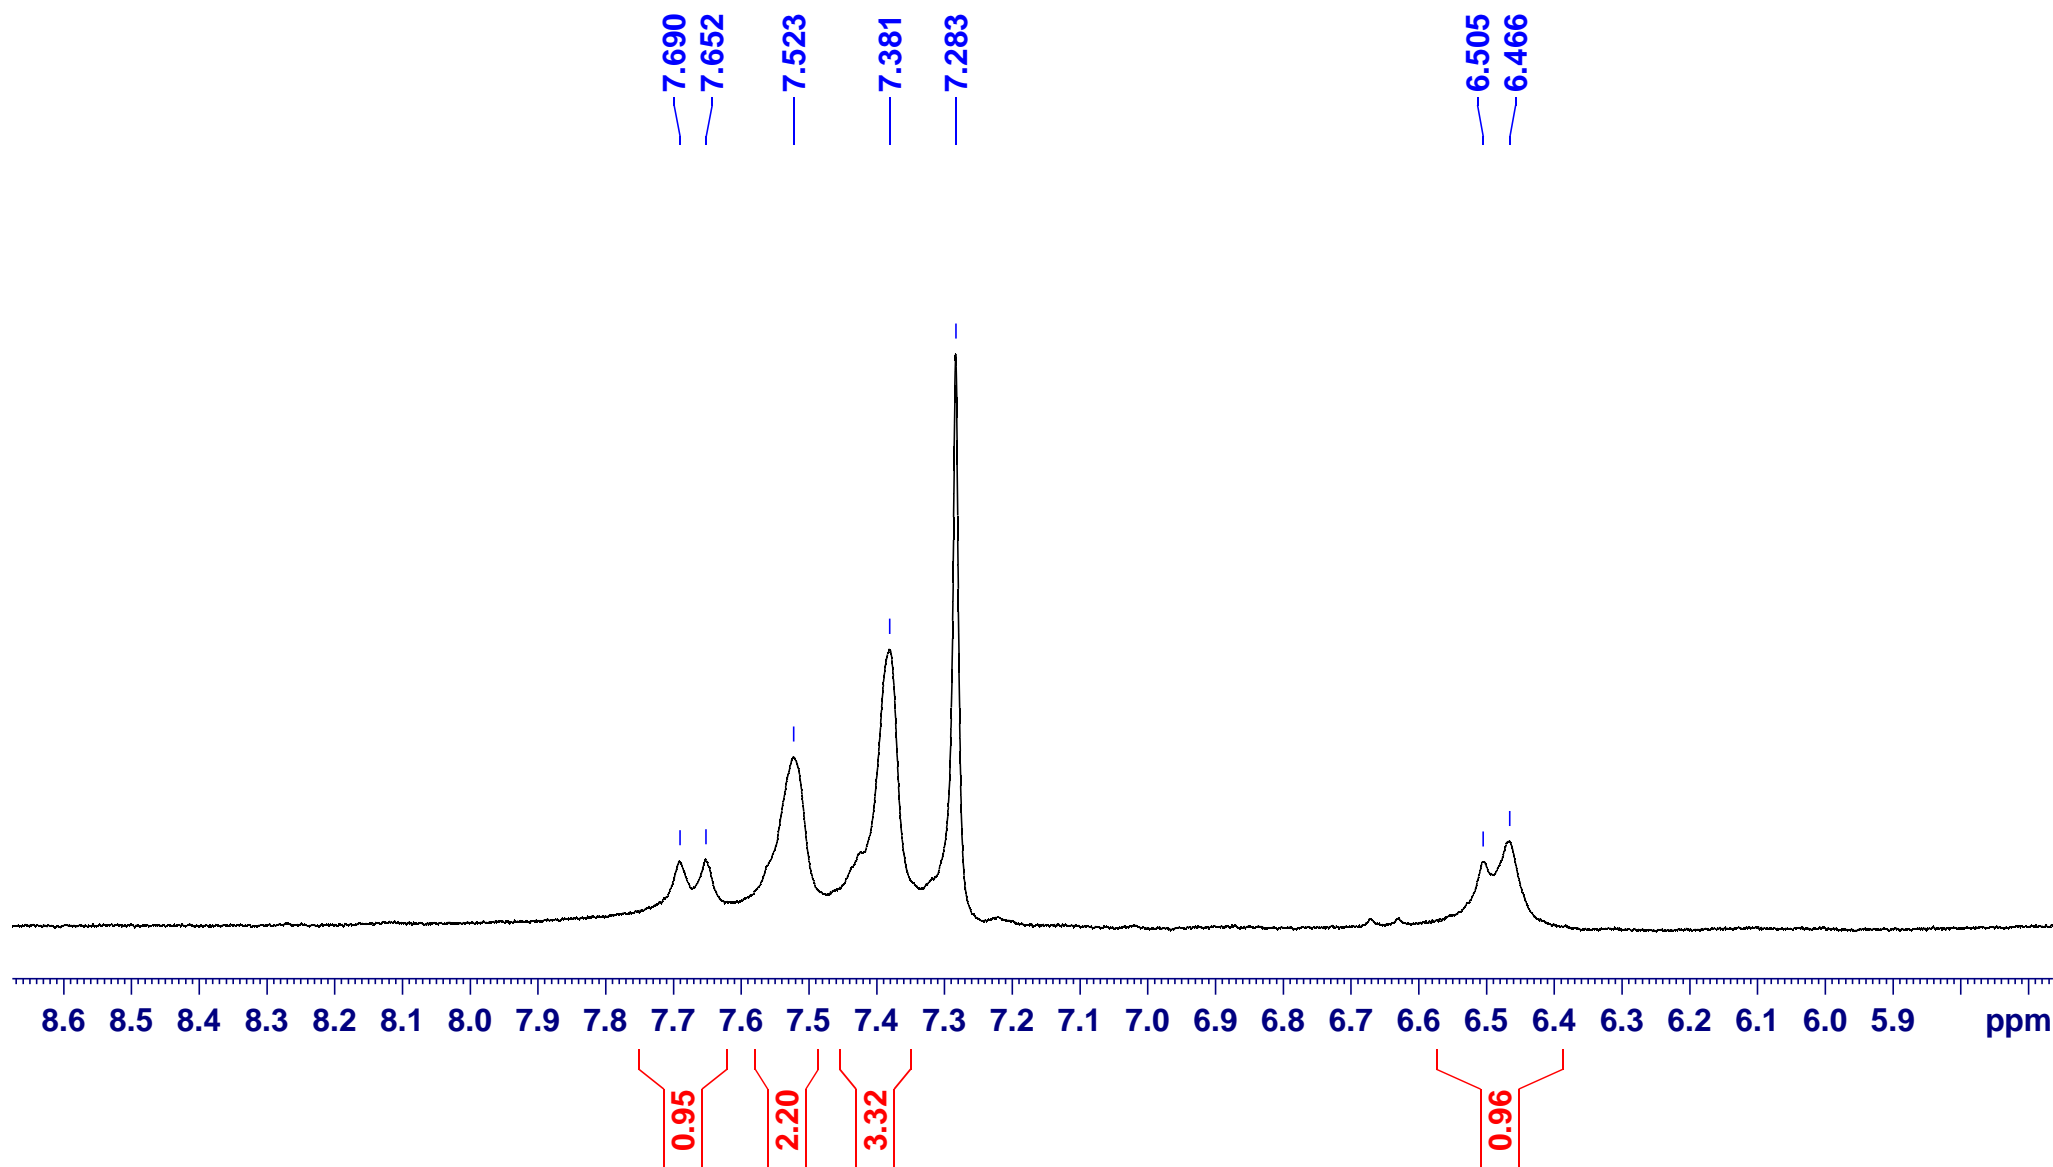

Supplement: d3fo04802k1.zip [file d3fo04802k1.zip]
