# Supplementary material for: New neuroprotective derivatives of cinnamic acid by biotransformation
Source: Royal Society of Chemistry journal article supplement (doi:10.1039/d3fo04802k), 2024-01-01

# Hadeer Elkhersawy-CM3-APT-CDCL3-MS

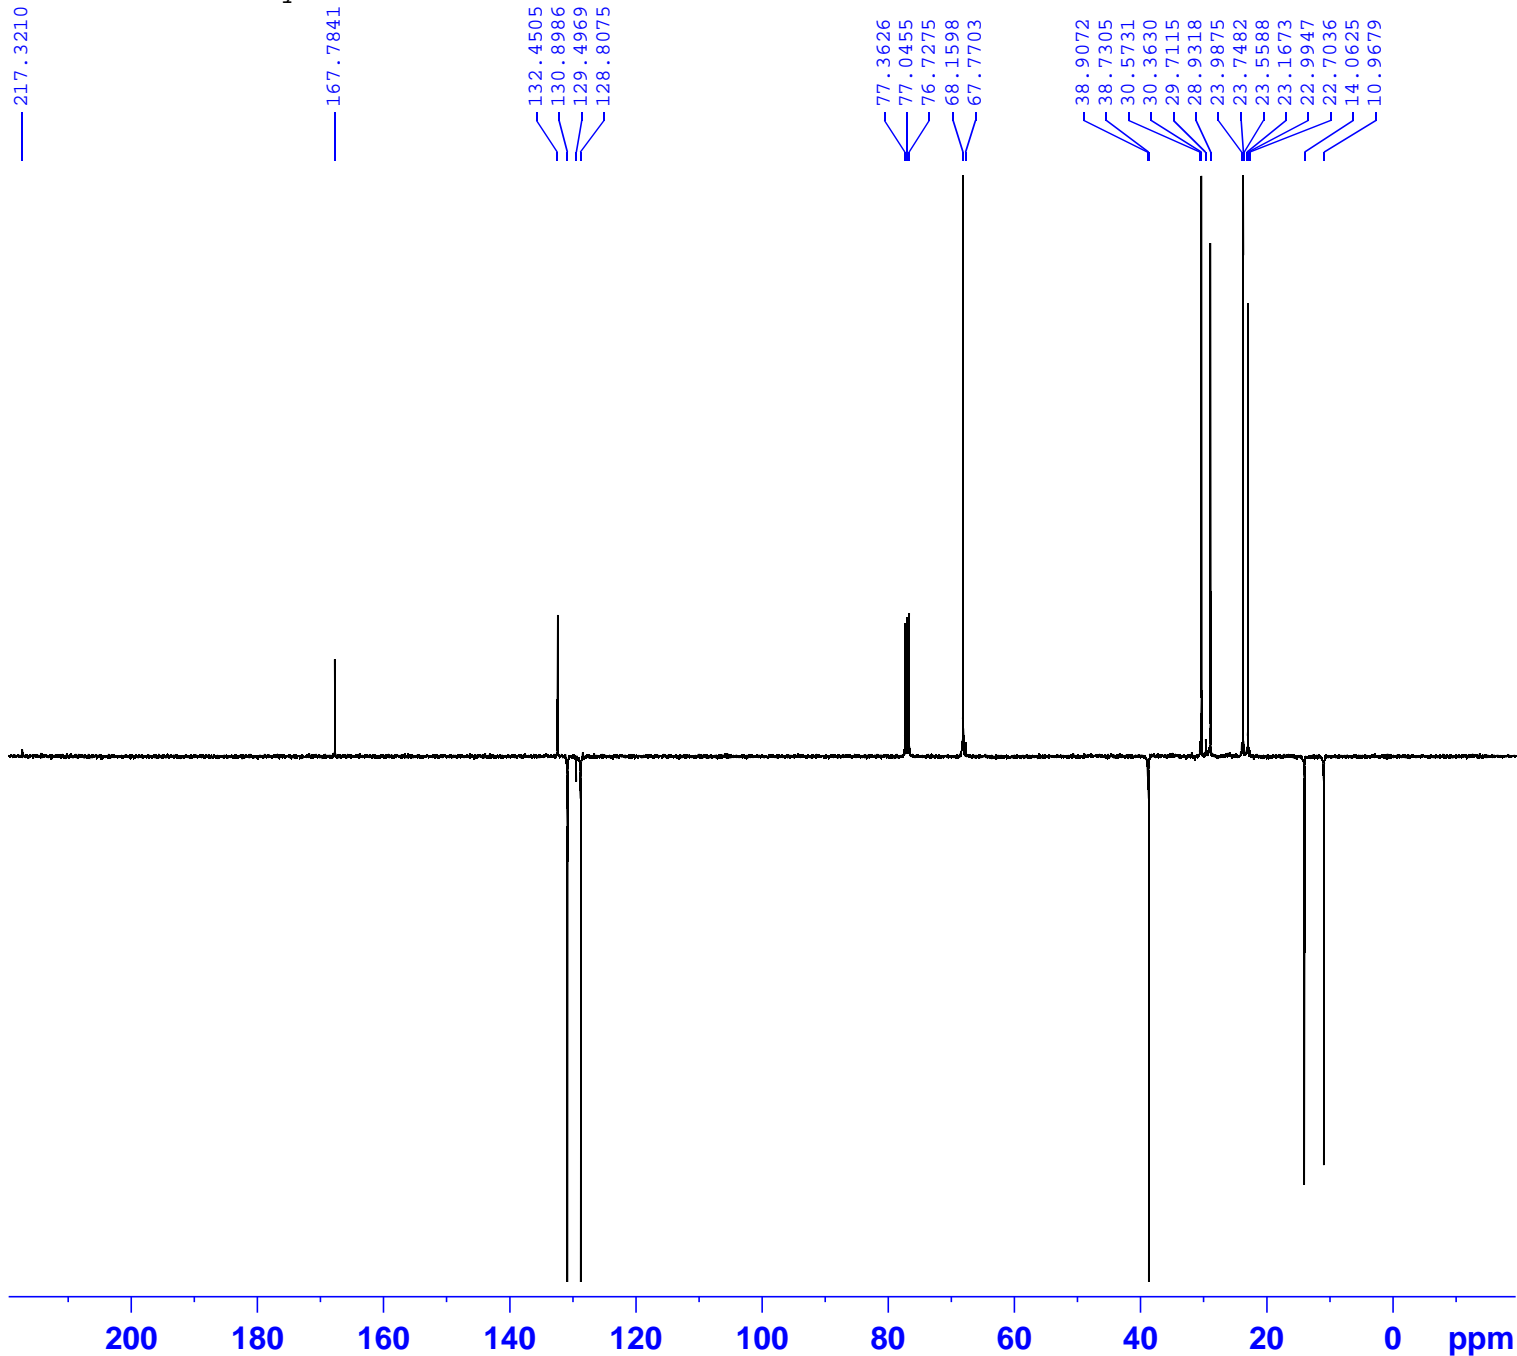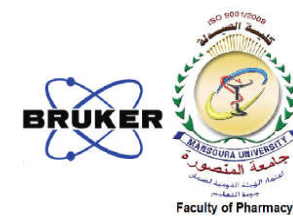

Current Data Parameters

|        |                                    |
|--------|------------------------------------|
| NAME   | Hadeer Elkhersawy-CM3-nmr-CDCL3-MS |
| EXPNO  | 11                                 |
| PROCNO | 1                                  |

F2 - Acquisition Parameters

|          |                 |
|----------|-----------------|
| Date_    | 20220429        |
| Time     | 6.53 h          |
| INSTRUM  | spect           |
| PROBHD   | Z108618_0945 (  |
| PULPROG  | jmod            |
| TD       | 65536           |
| SOLVENT  | CDCL3           |
| NS       | 2220            |
| DS       | 4               |
| SWH      | 24038.461 Hz    |
| FIDRES   | 0.733596 Hz     |
| AQ       | 1.3631488 sec   |
| RG       | 197.77          |
| DW       | 20.800 usec     |
| DE       | 6.50 usec       |
| TE       | 296.4 K         |
| CNST2    | 145.0000000     |
| CNST11   | 1.0000000       |
| D1       | 2.00000000 sec  |
| D20      | 0.00689655 sec  |
| TD0      | 1               |
| SFO1     | 100.6404331 MHz |
| NUC1     | 13C             |
| P1       | 10.00 usec      |
| P2       | 20.00 usec      |
| PLW1     | 47.00000000 W   |
| SFO2     | 400.2016008 MHz |
| NUC2     | 1H              |
| CPDPRG[2 | waltz16         |
| PCPD2    | 90.00 usec      |
| PLW2     | 13.00000000 W   |
| PLW12    | 0.29249999 W    |

F2 - Processing parameters

|     |                 |
|-----|-----------------|
| SI  | 32768           |
| SF  | 100.6303700 MHz |
| WDW | EM              |
| SSB | 0               |
| LB  | 1.00 Hz         |
| GB  | 0               |
| PC  | 1.40            |

Hadeer Elkhersawy-CM3-APT-CDCL3-MS

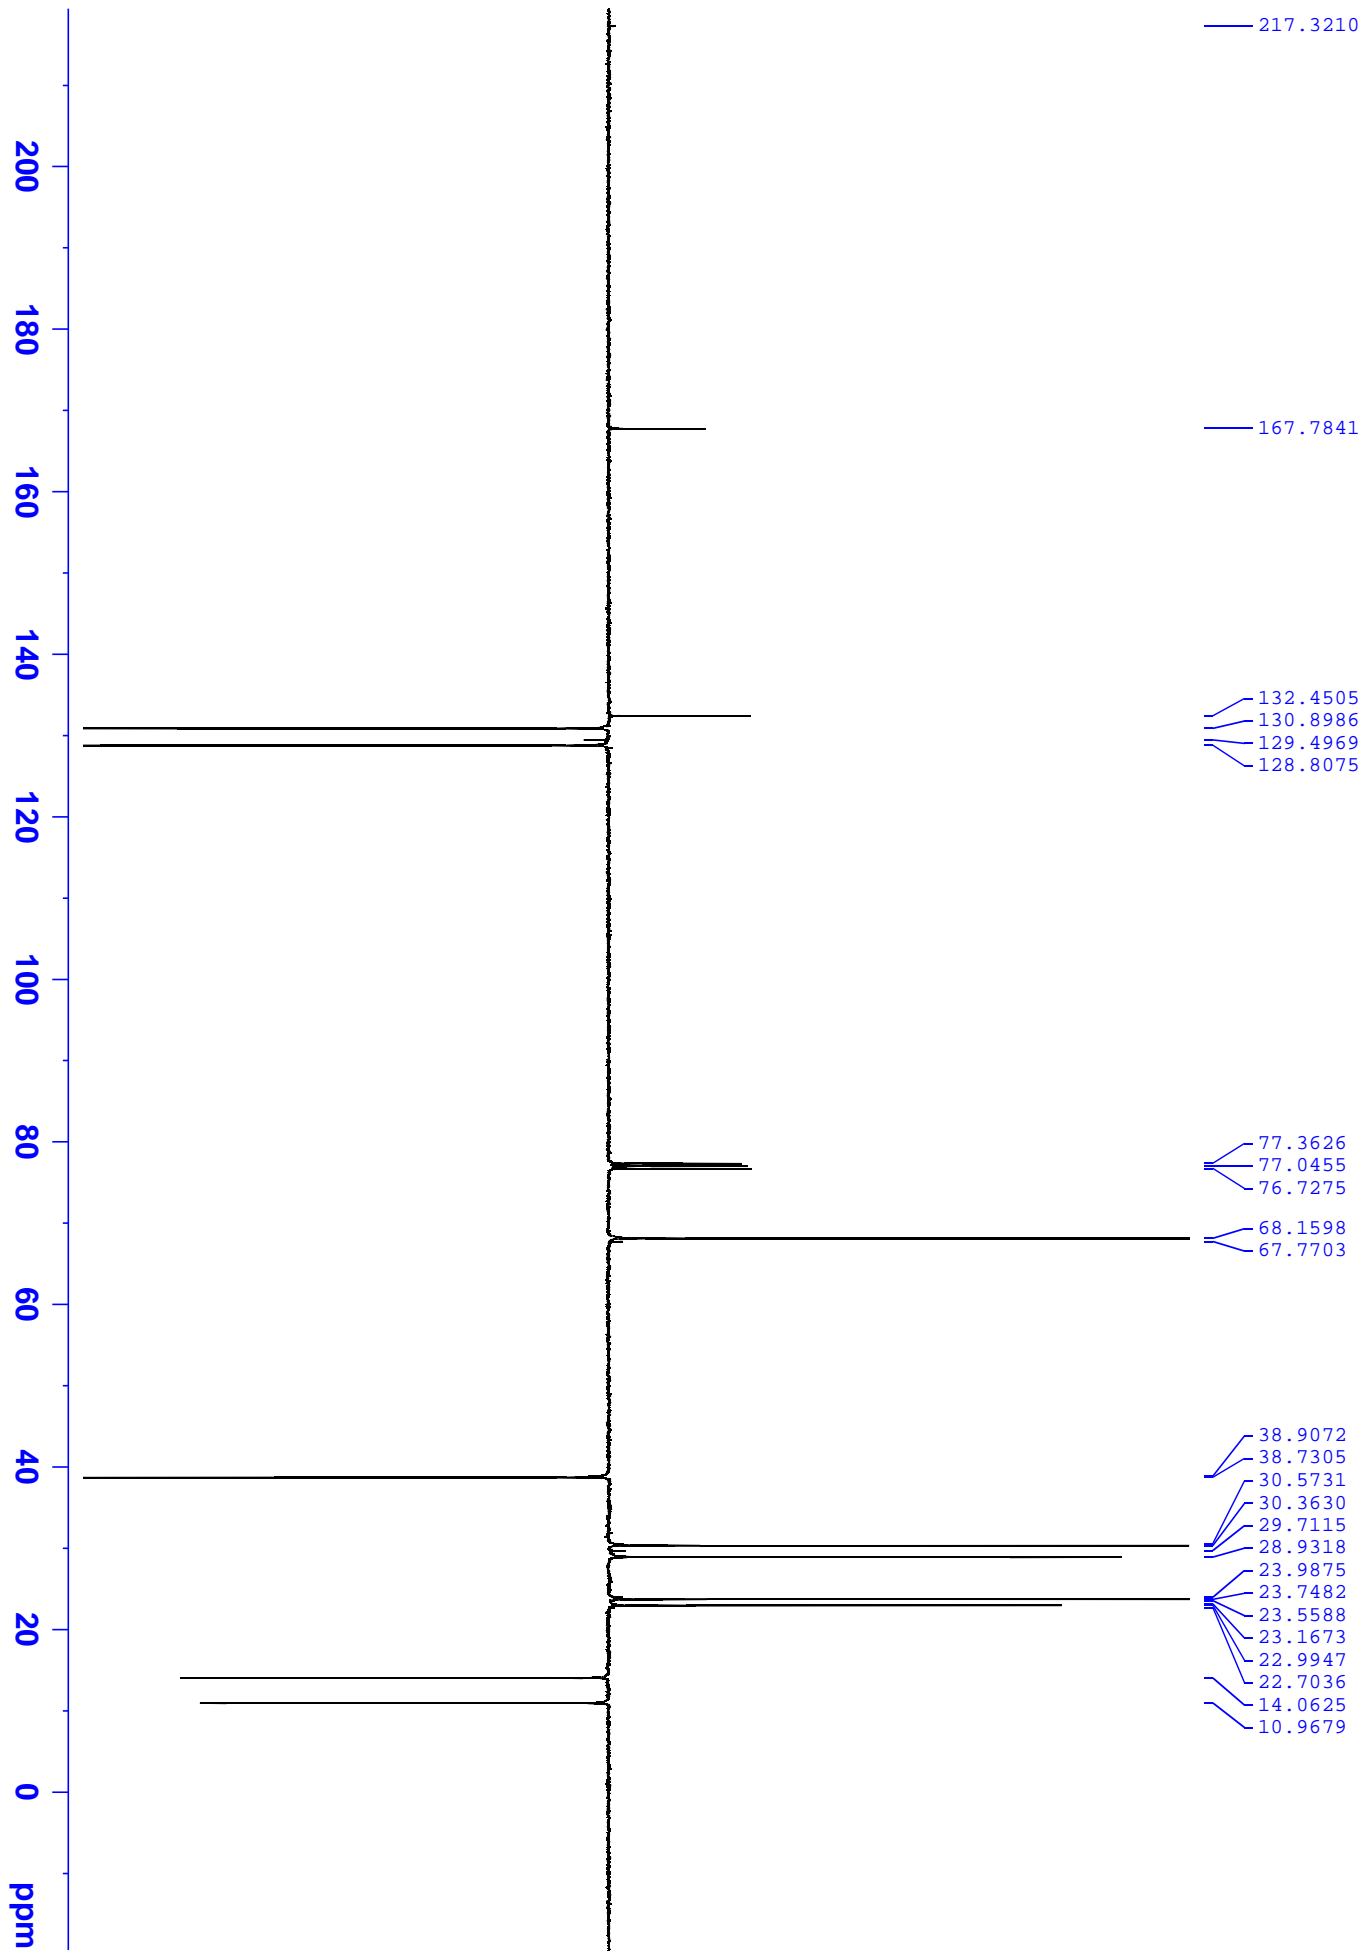

Hadeer Elkhersawy-CM3-APT-CDCL3-MS

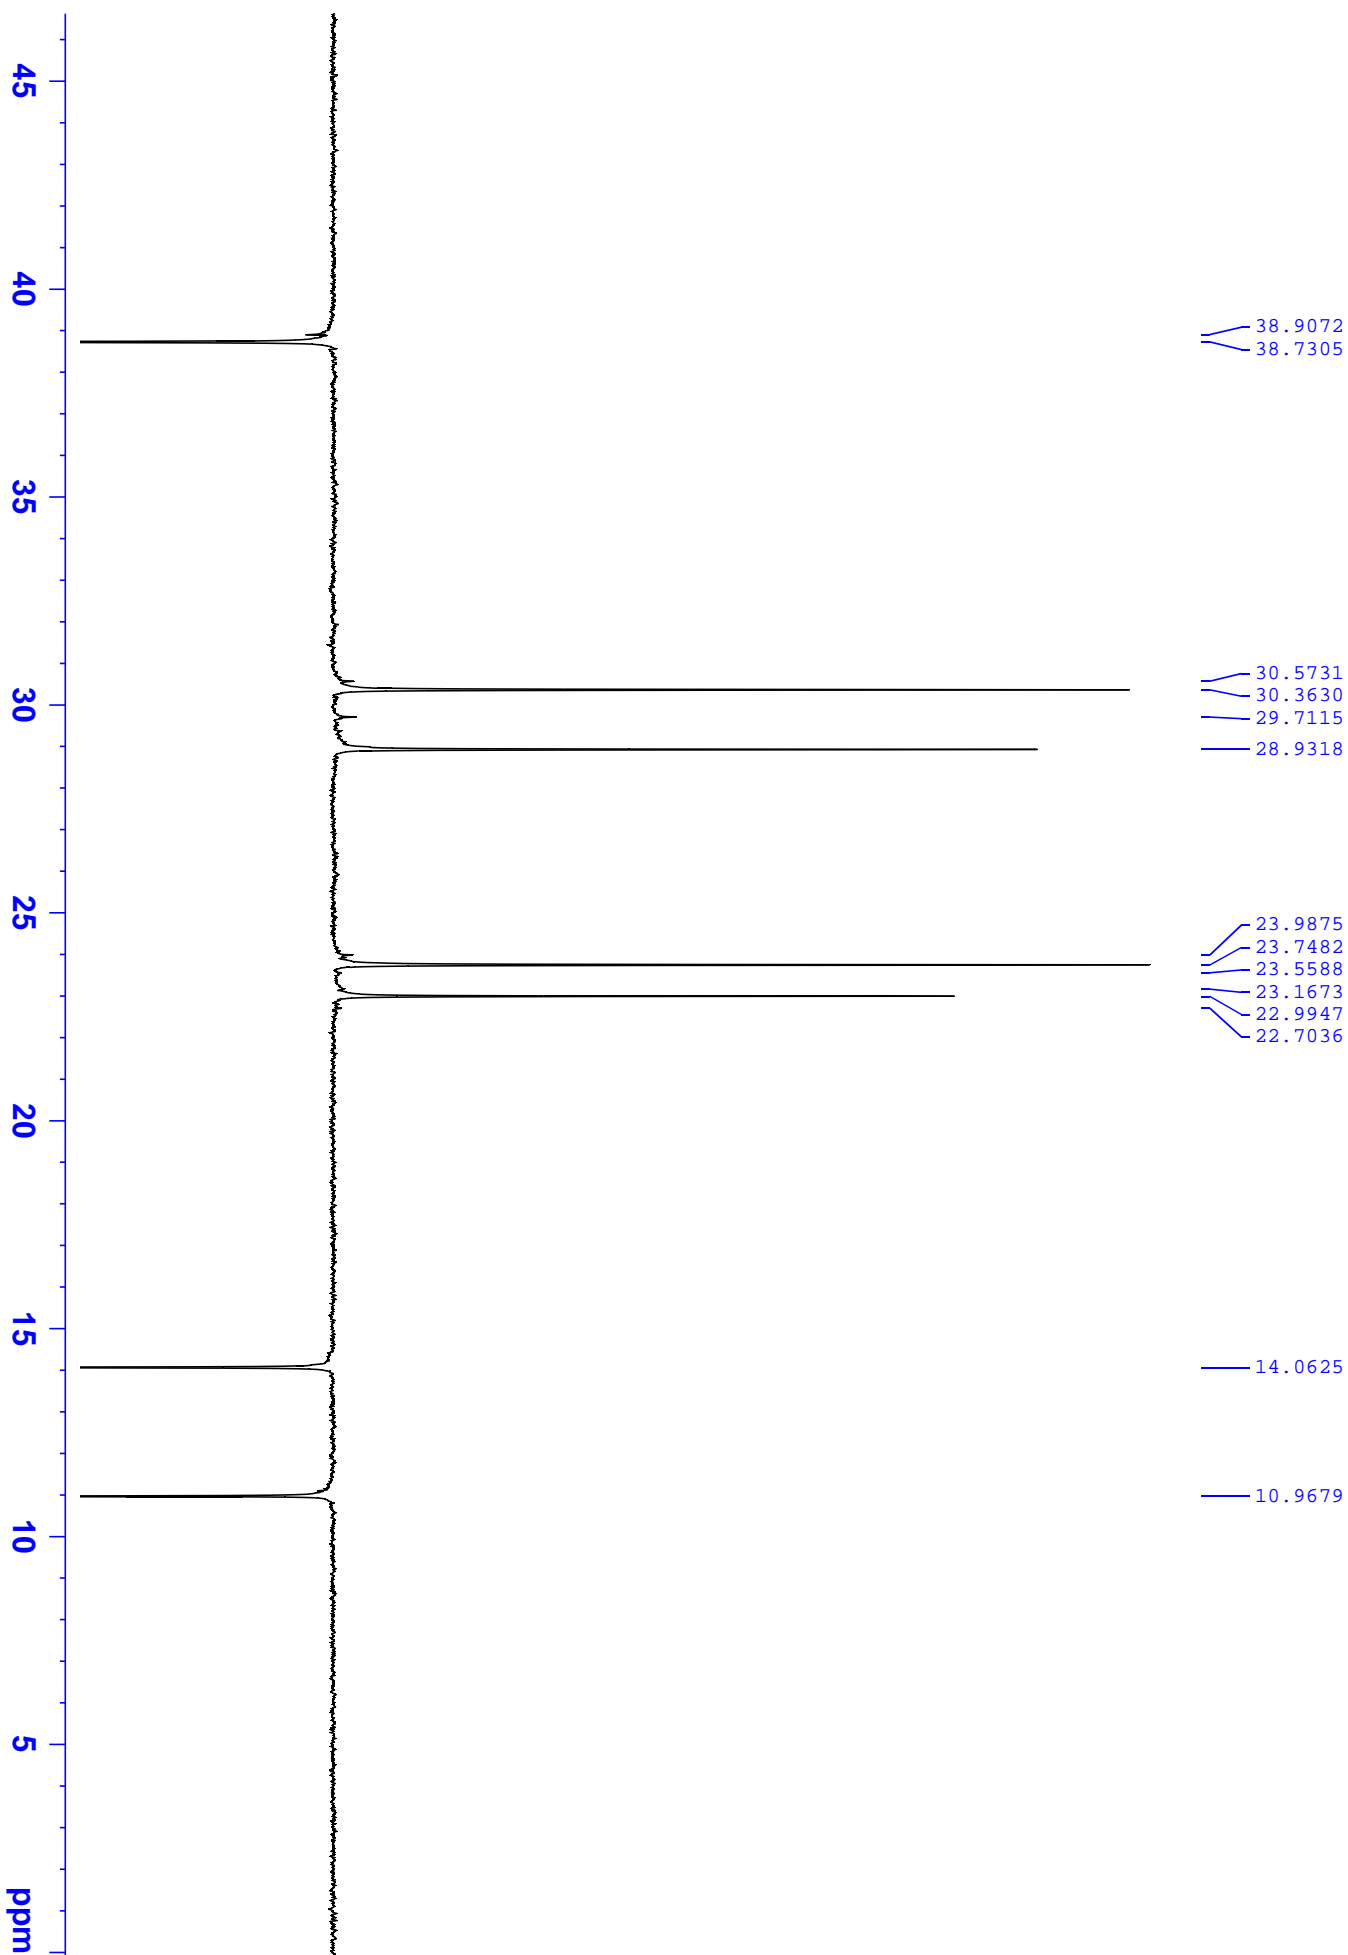

Hadeer Elkhersawy-CM3-APT-CDCL3-MS

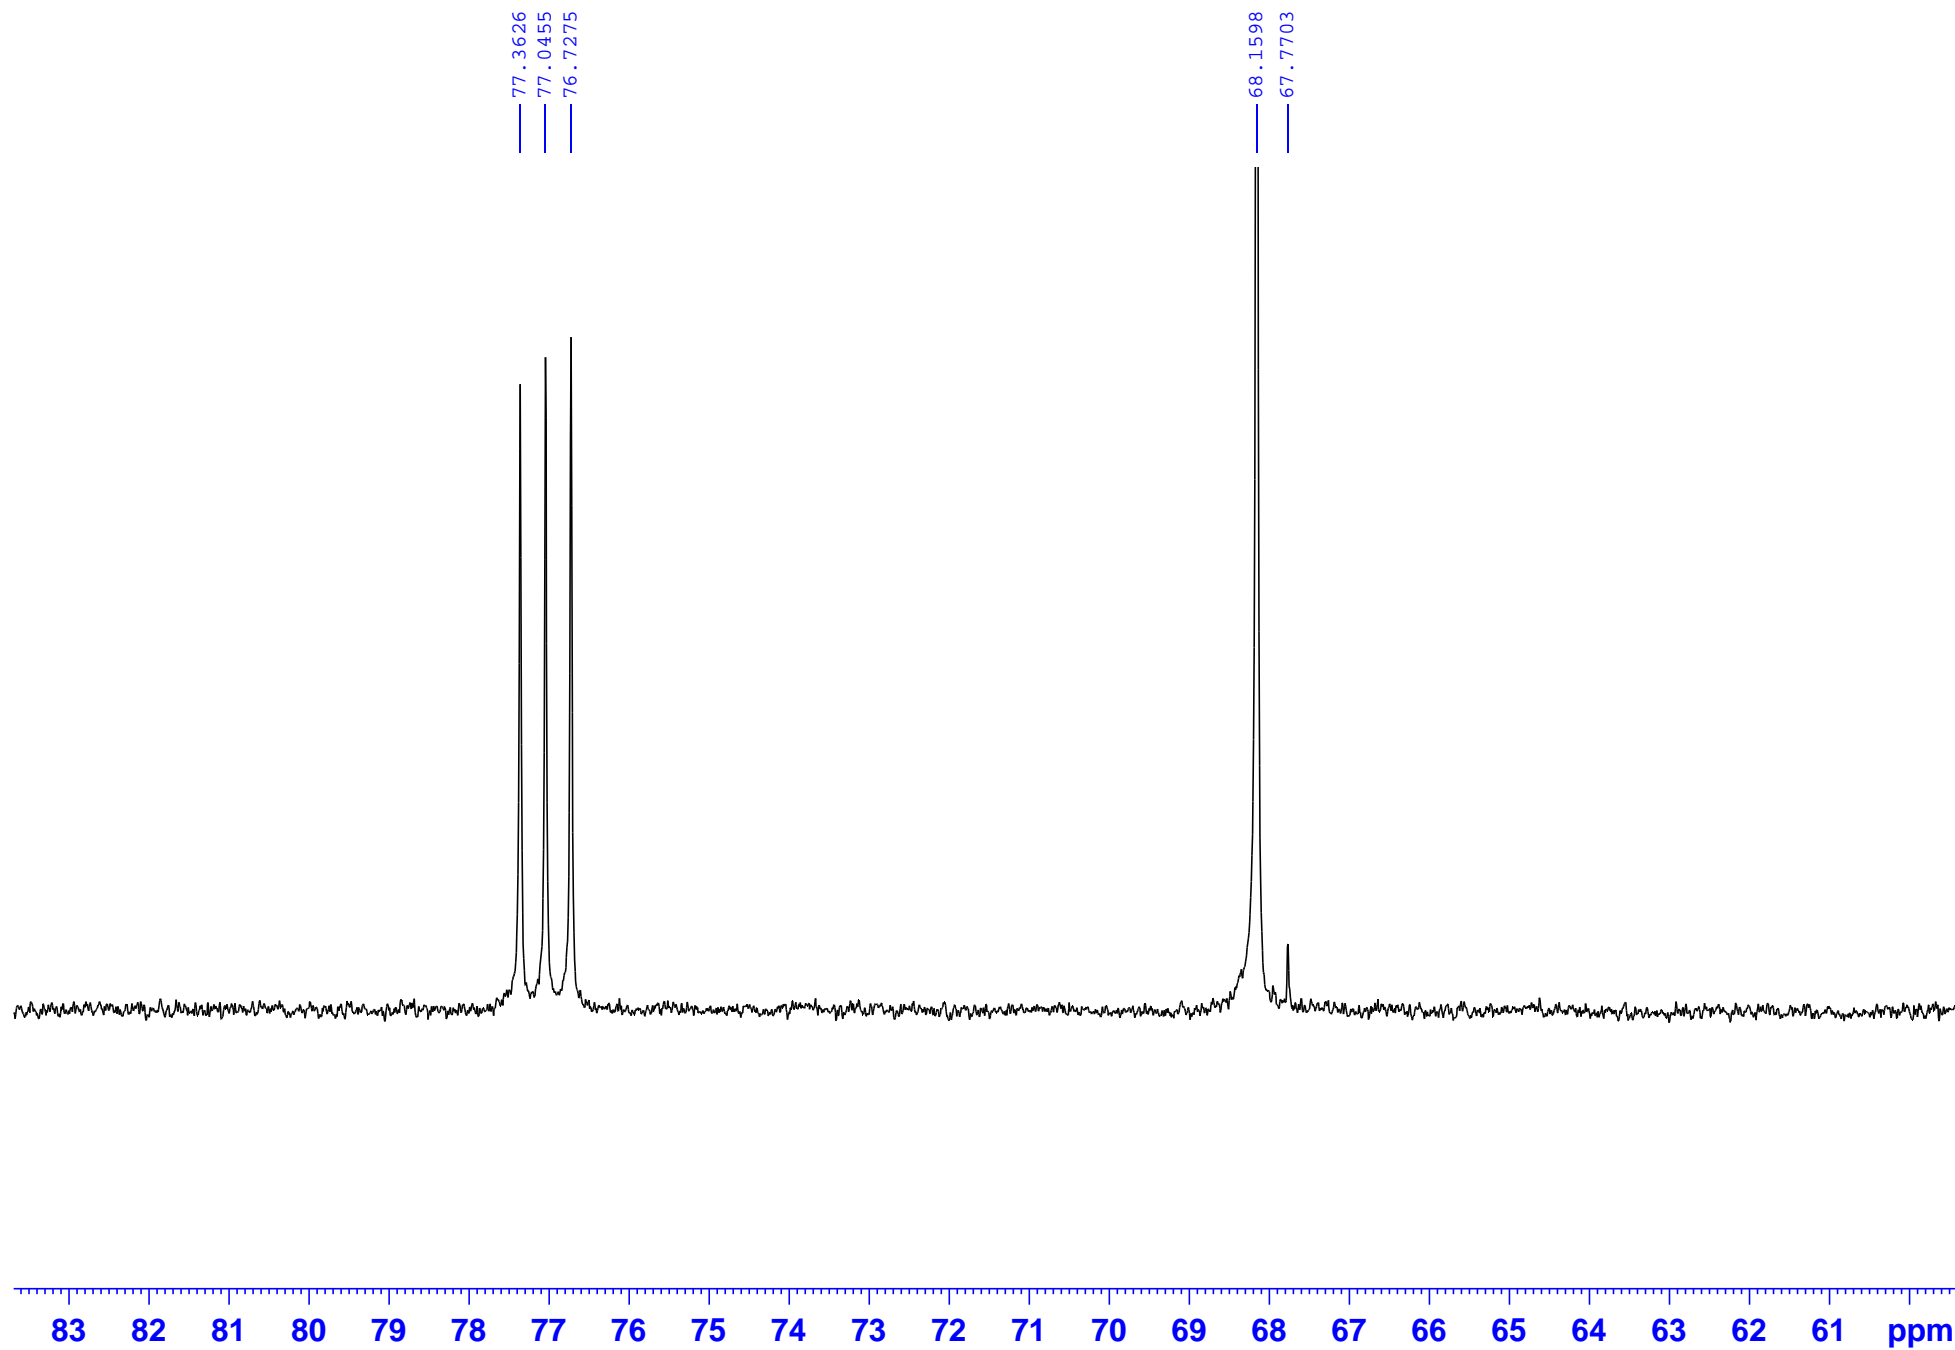

Hadeer Elkhersawy-CM3-APT-CDCL3-MS

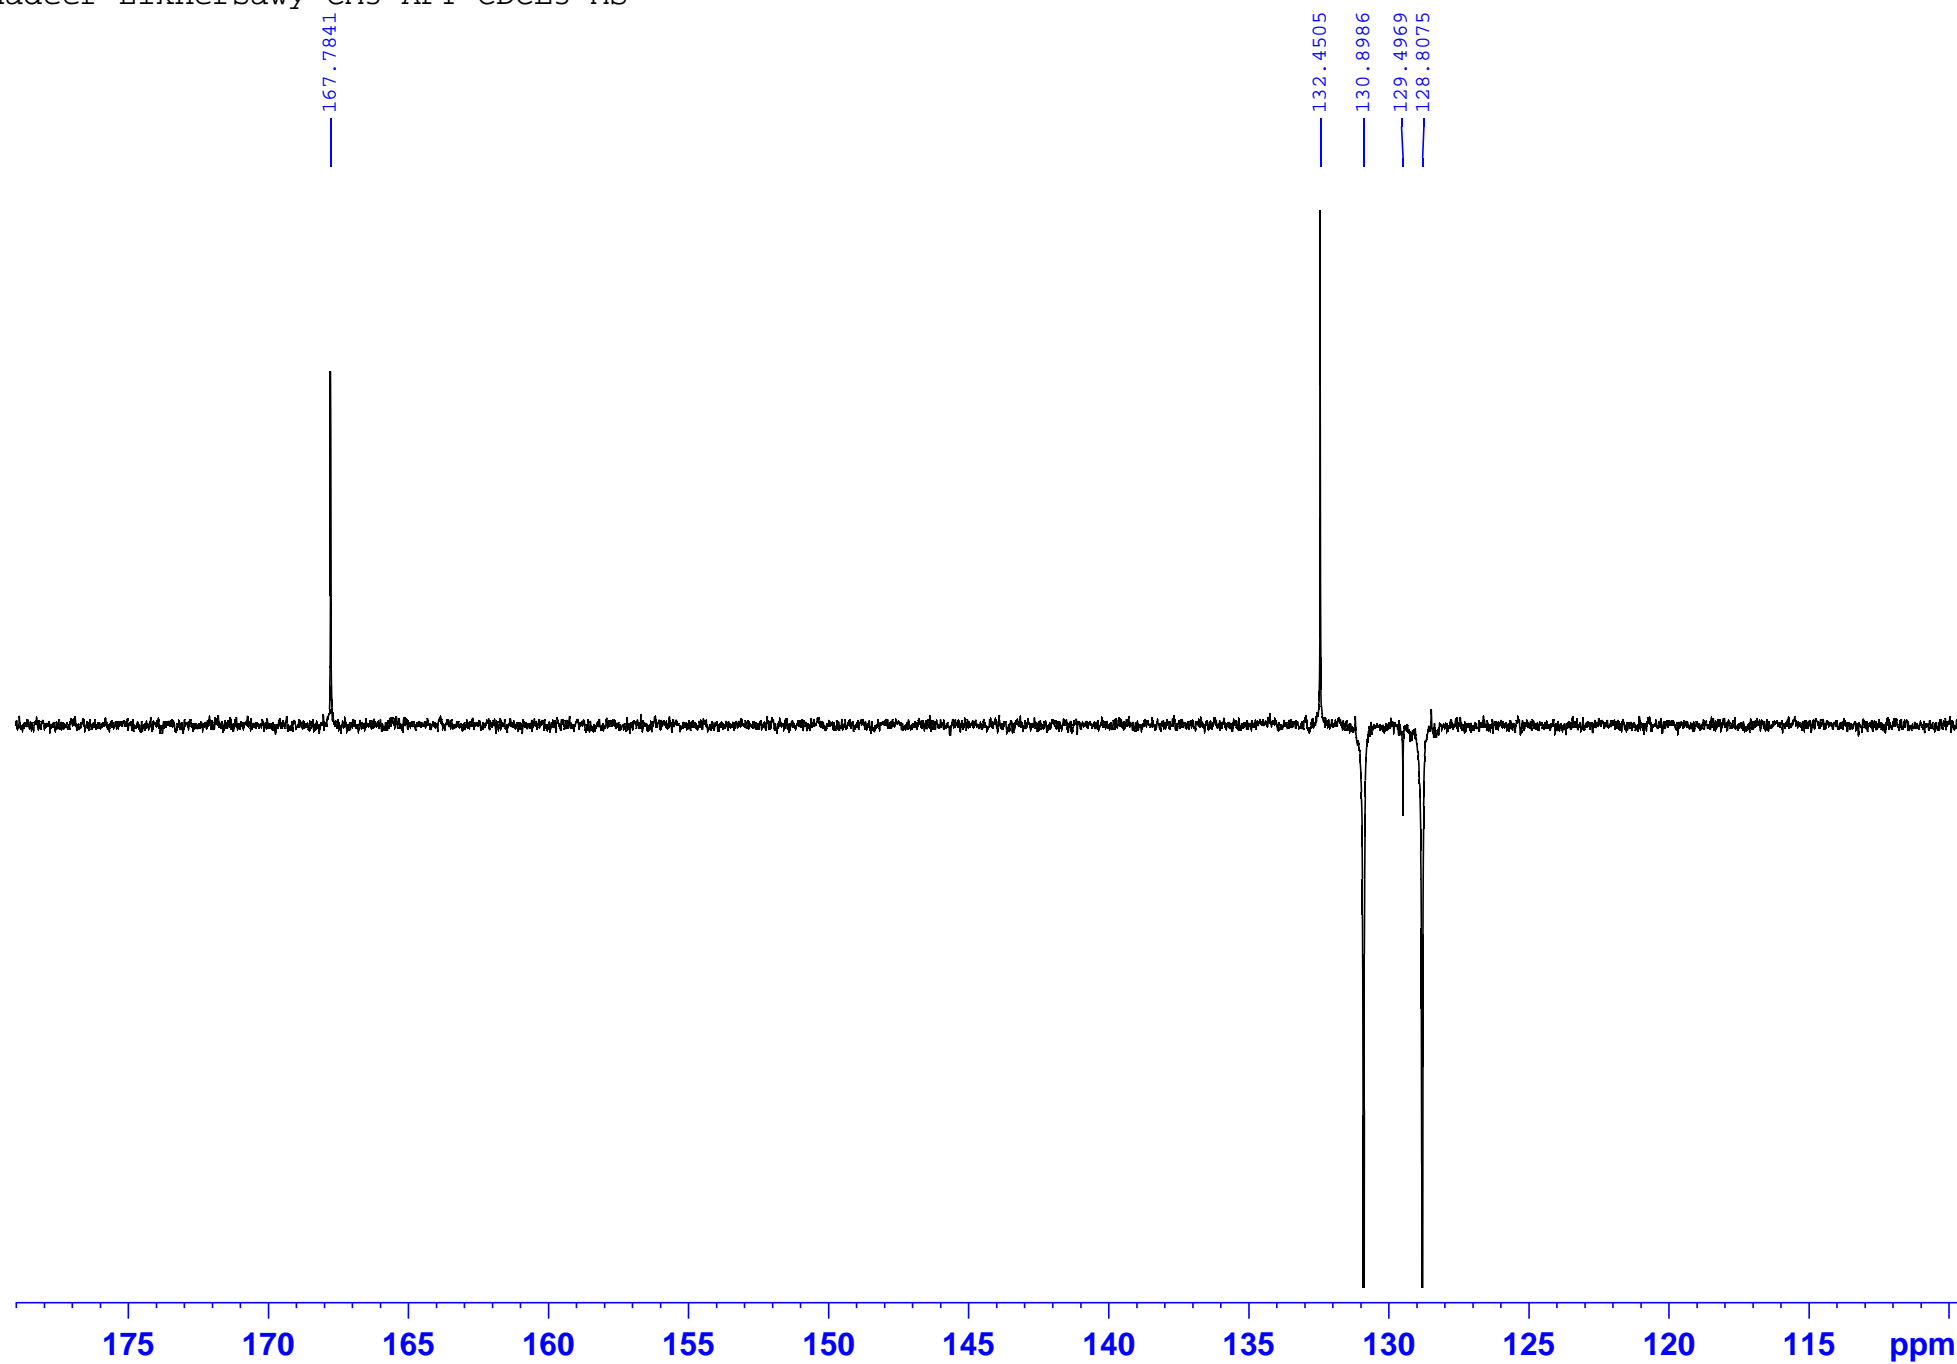

# Hadeer Elkhersawy-CM3-Proton-CDCL3-MS

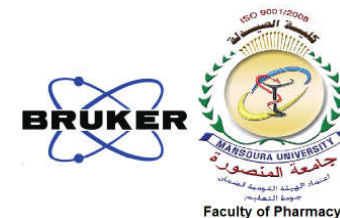

Current Data Parameters  
NAME Hadeer Elkhersawy-CM3-nmr  
EXPNO 10  
PROCNO 1

F2 - Acquisition Parameters  
Date\_ 20220429  
Time 4.45 h  
INSTRUM spect  
PROBHD Z108618\_0945 (   
PULPROG zg30  
TD 65536  
SOLVENT CDCl3  
NS 16  
DS 2  
SWH 8012.820 Hz  
FIDRES 0.244532 Hz  
AQ 4.0894465 sec  
RG 48.16  
DW 62.400 usec  
DE 6.50 usec  
TE 295.0 K  
D1 1.00000000 sec  
TD0 1  
SF01 400.2024712 MHz  
NUC1 1H  
P1 13.50 usec  
PLW1 13.00000000 W

F2 - Processing parameters  
SI 65536  
SF 400.2000373 MHz  
WDW EM  
SSB 0  
LB 0.30 Hz  
GB 0  
PC 1.00

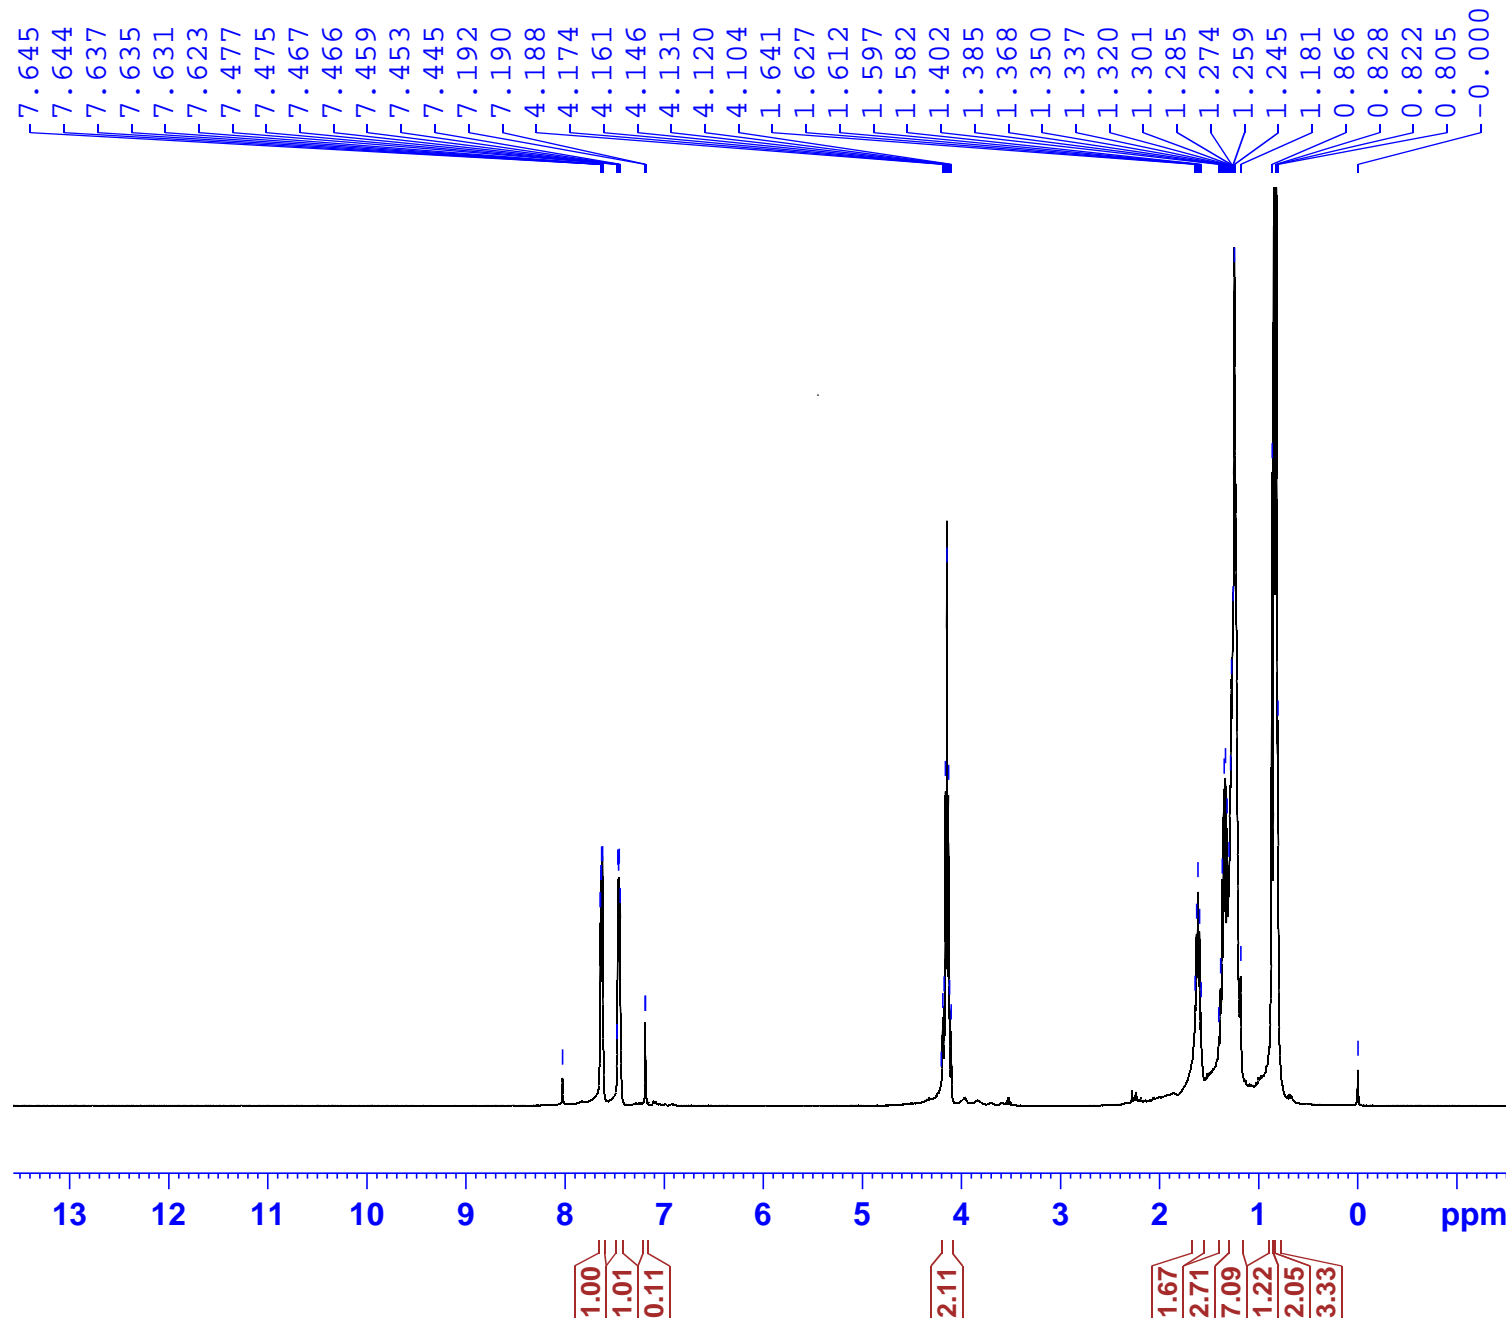

Hadeer Elkhersawy-CM3-Proton-CDCL3-MS

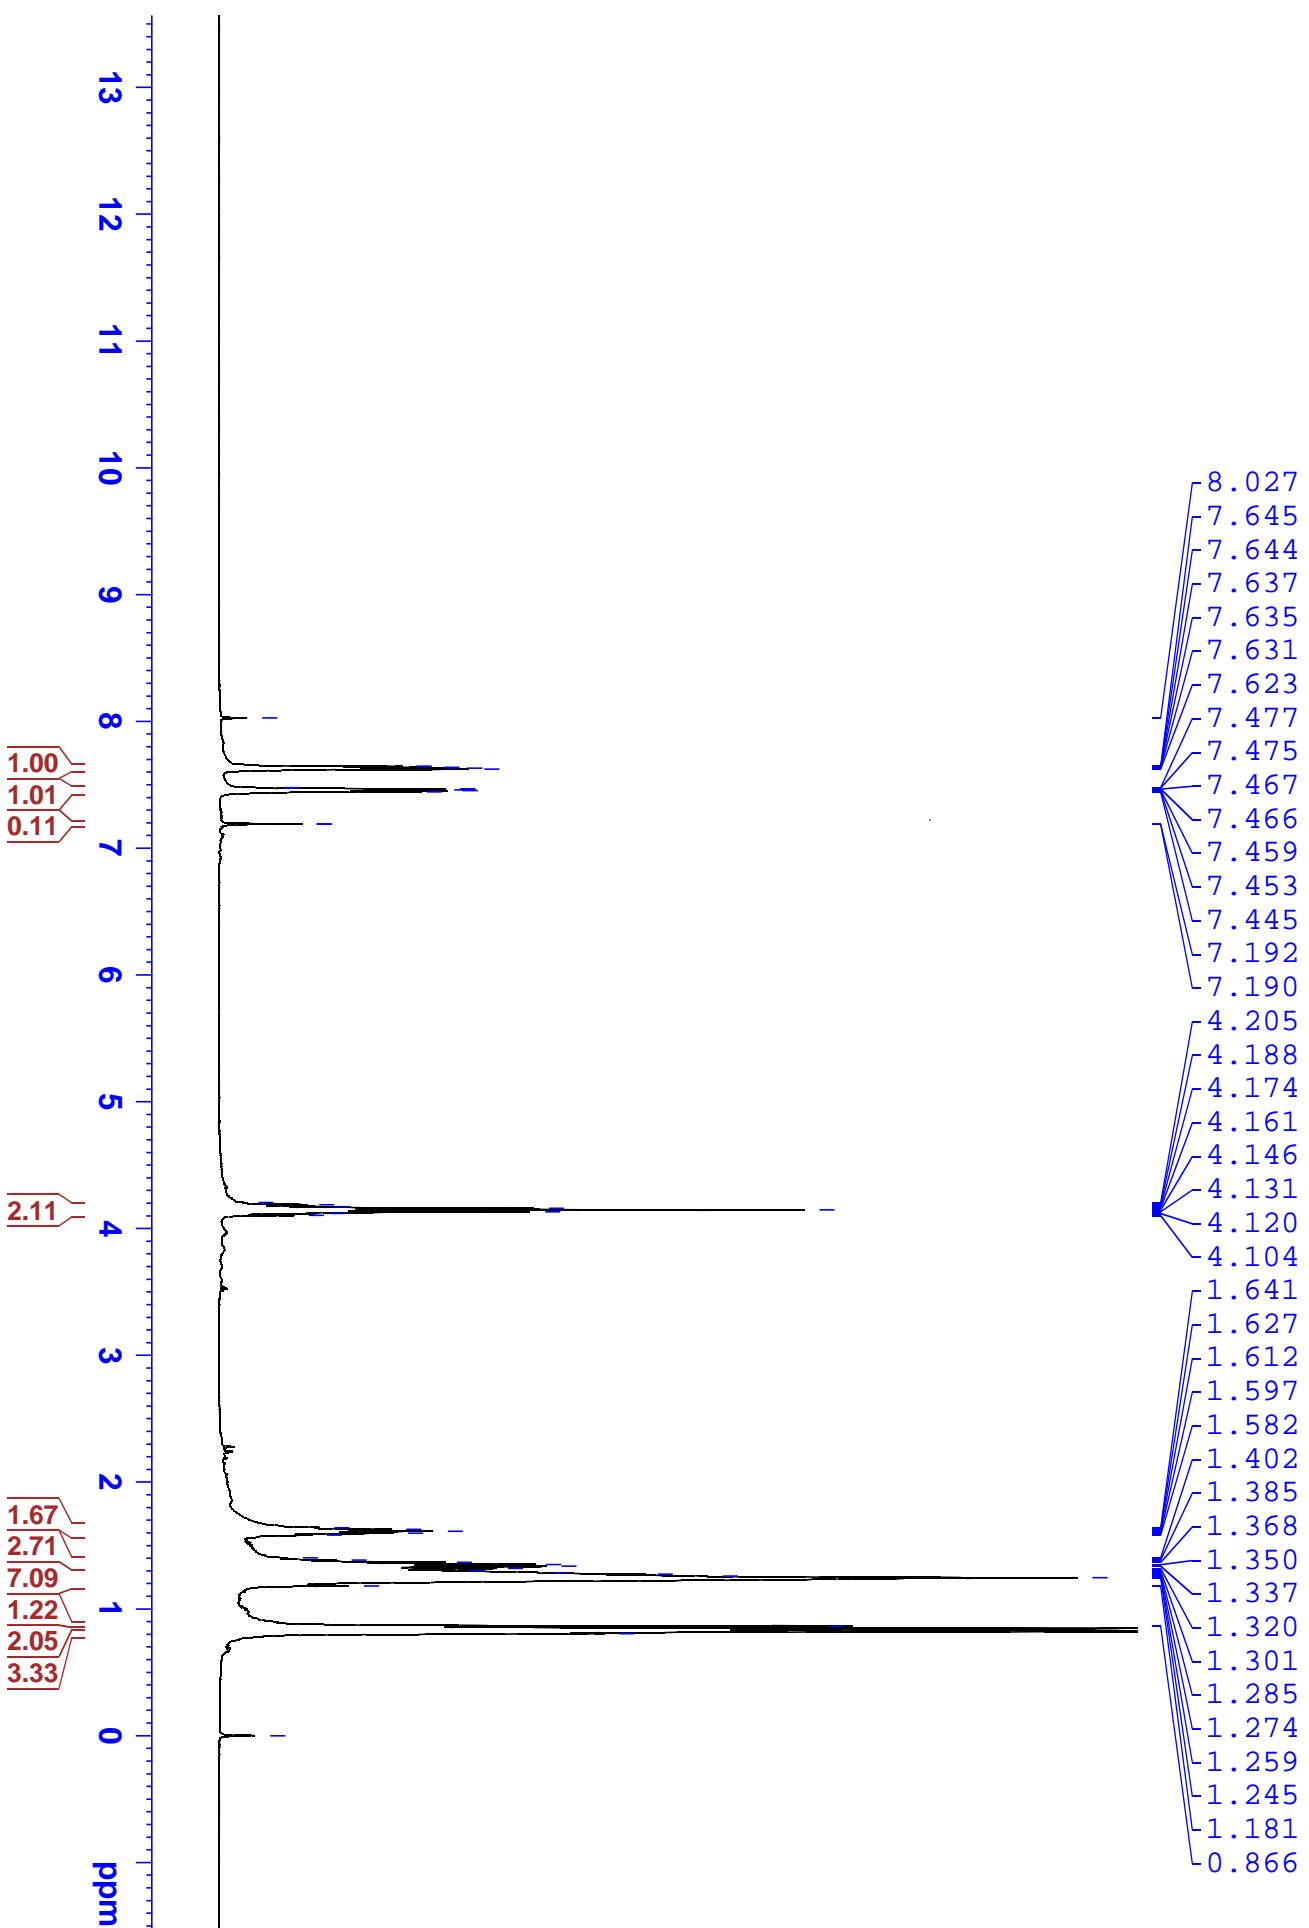

Hadeer Elkhersawy-CM3-Proton-CDCL3-MS

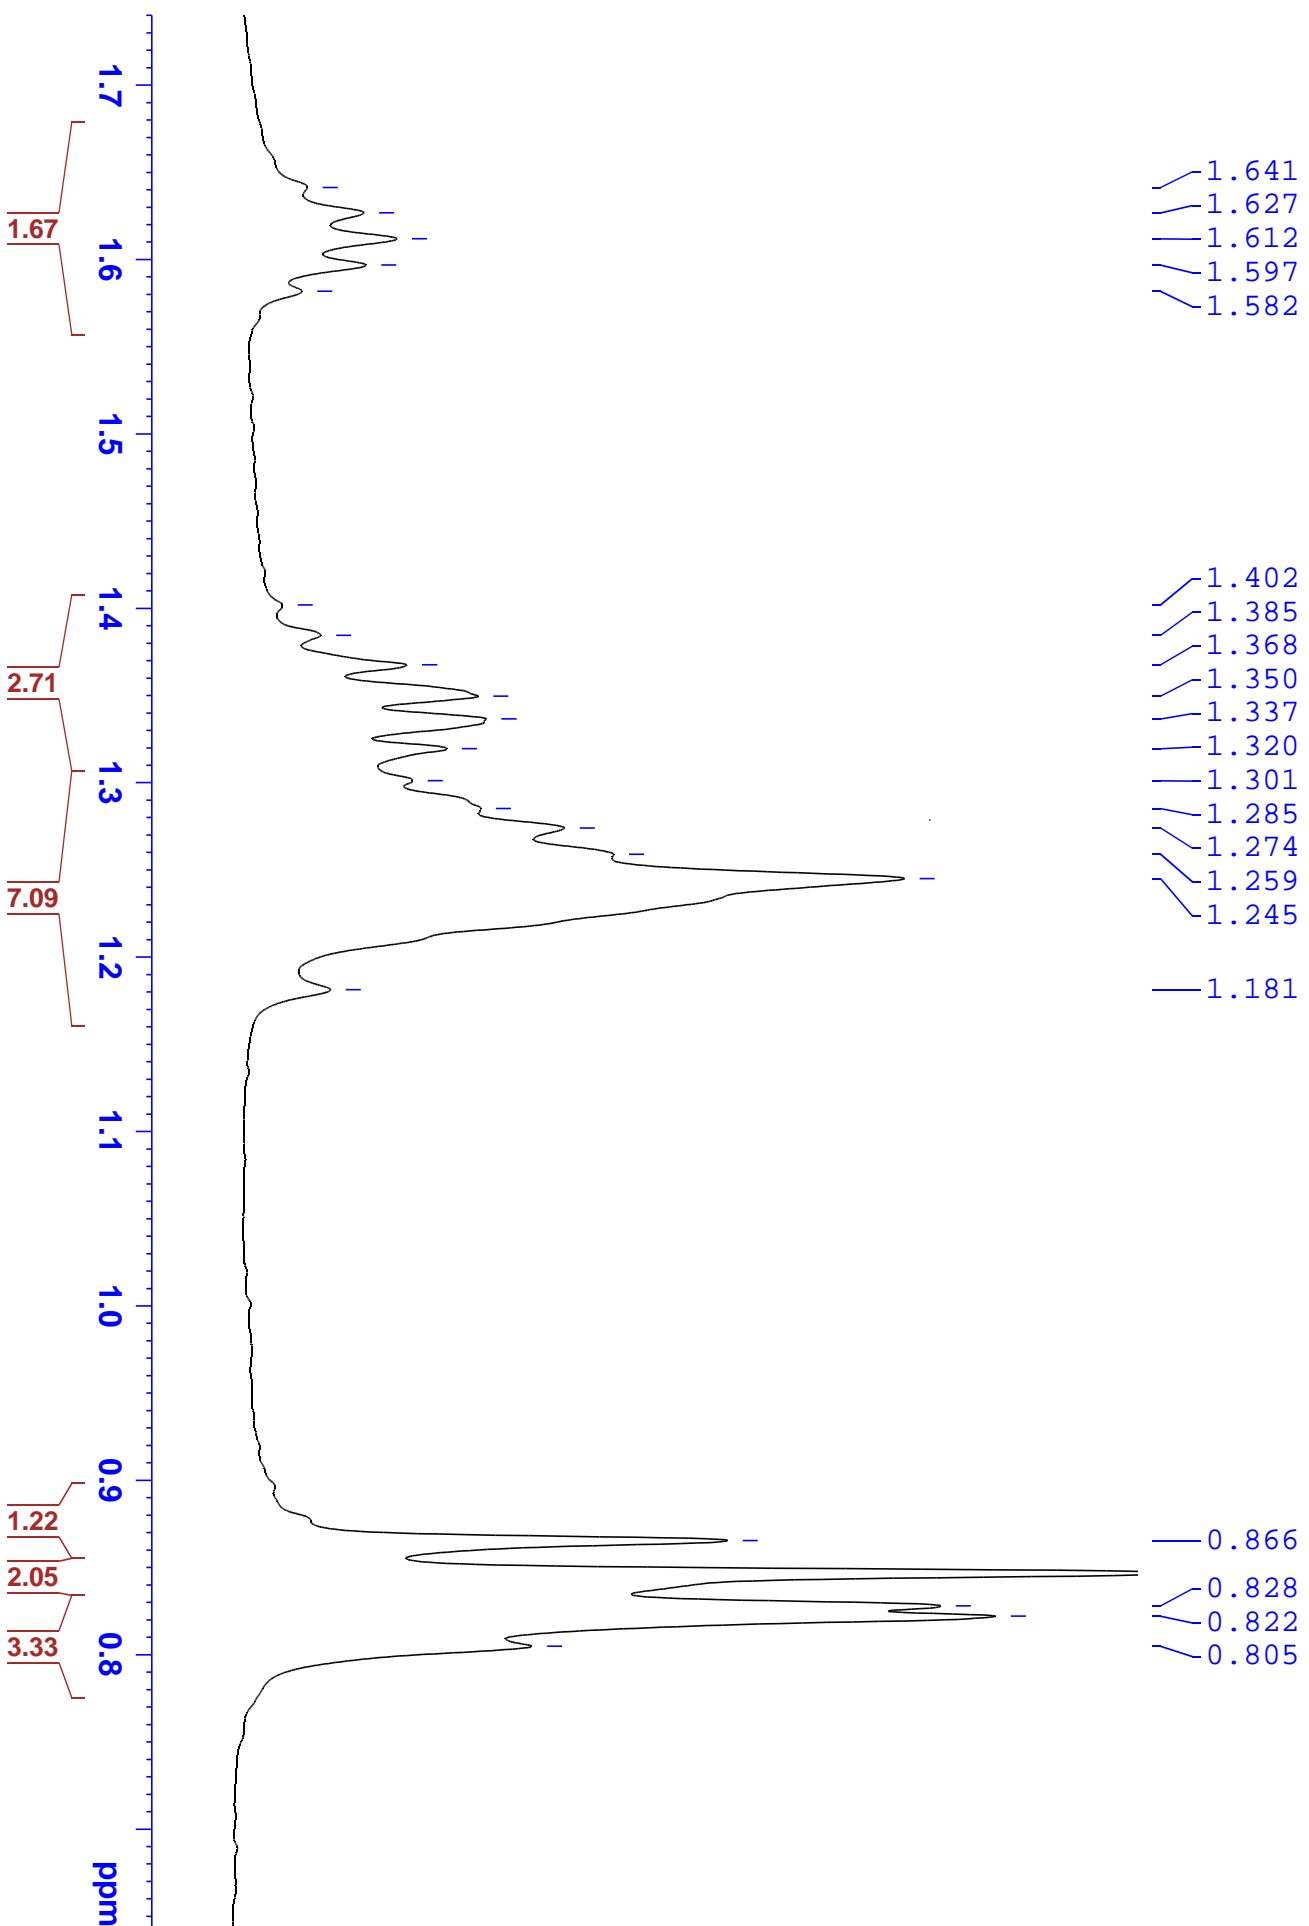



Hadeer Elkhersawy-CM3-Proton-CDCL3-MS

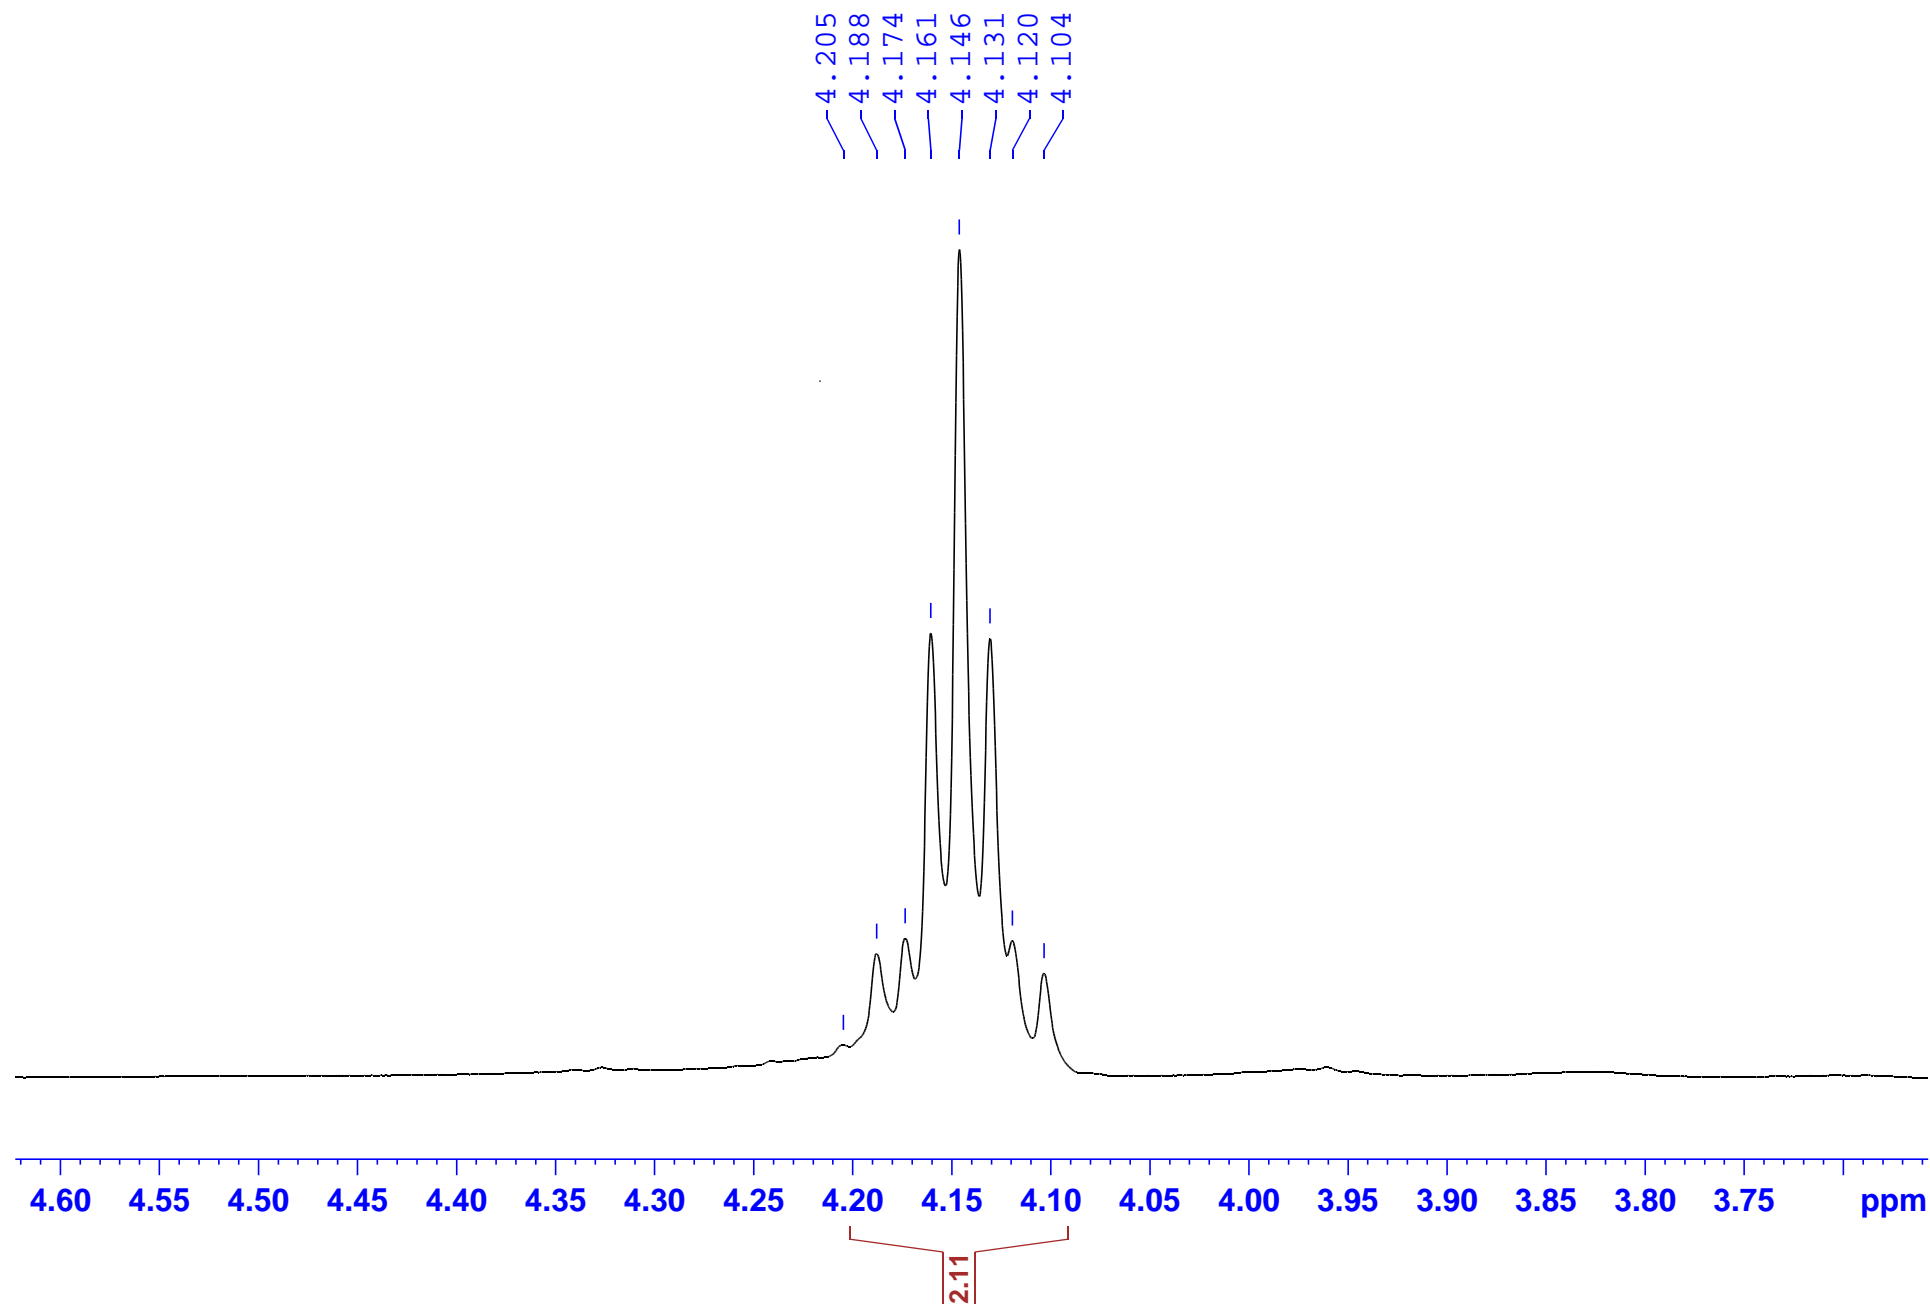

Hadeer Elkhersawy-CM3-Proton-CDCL3-MS

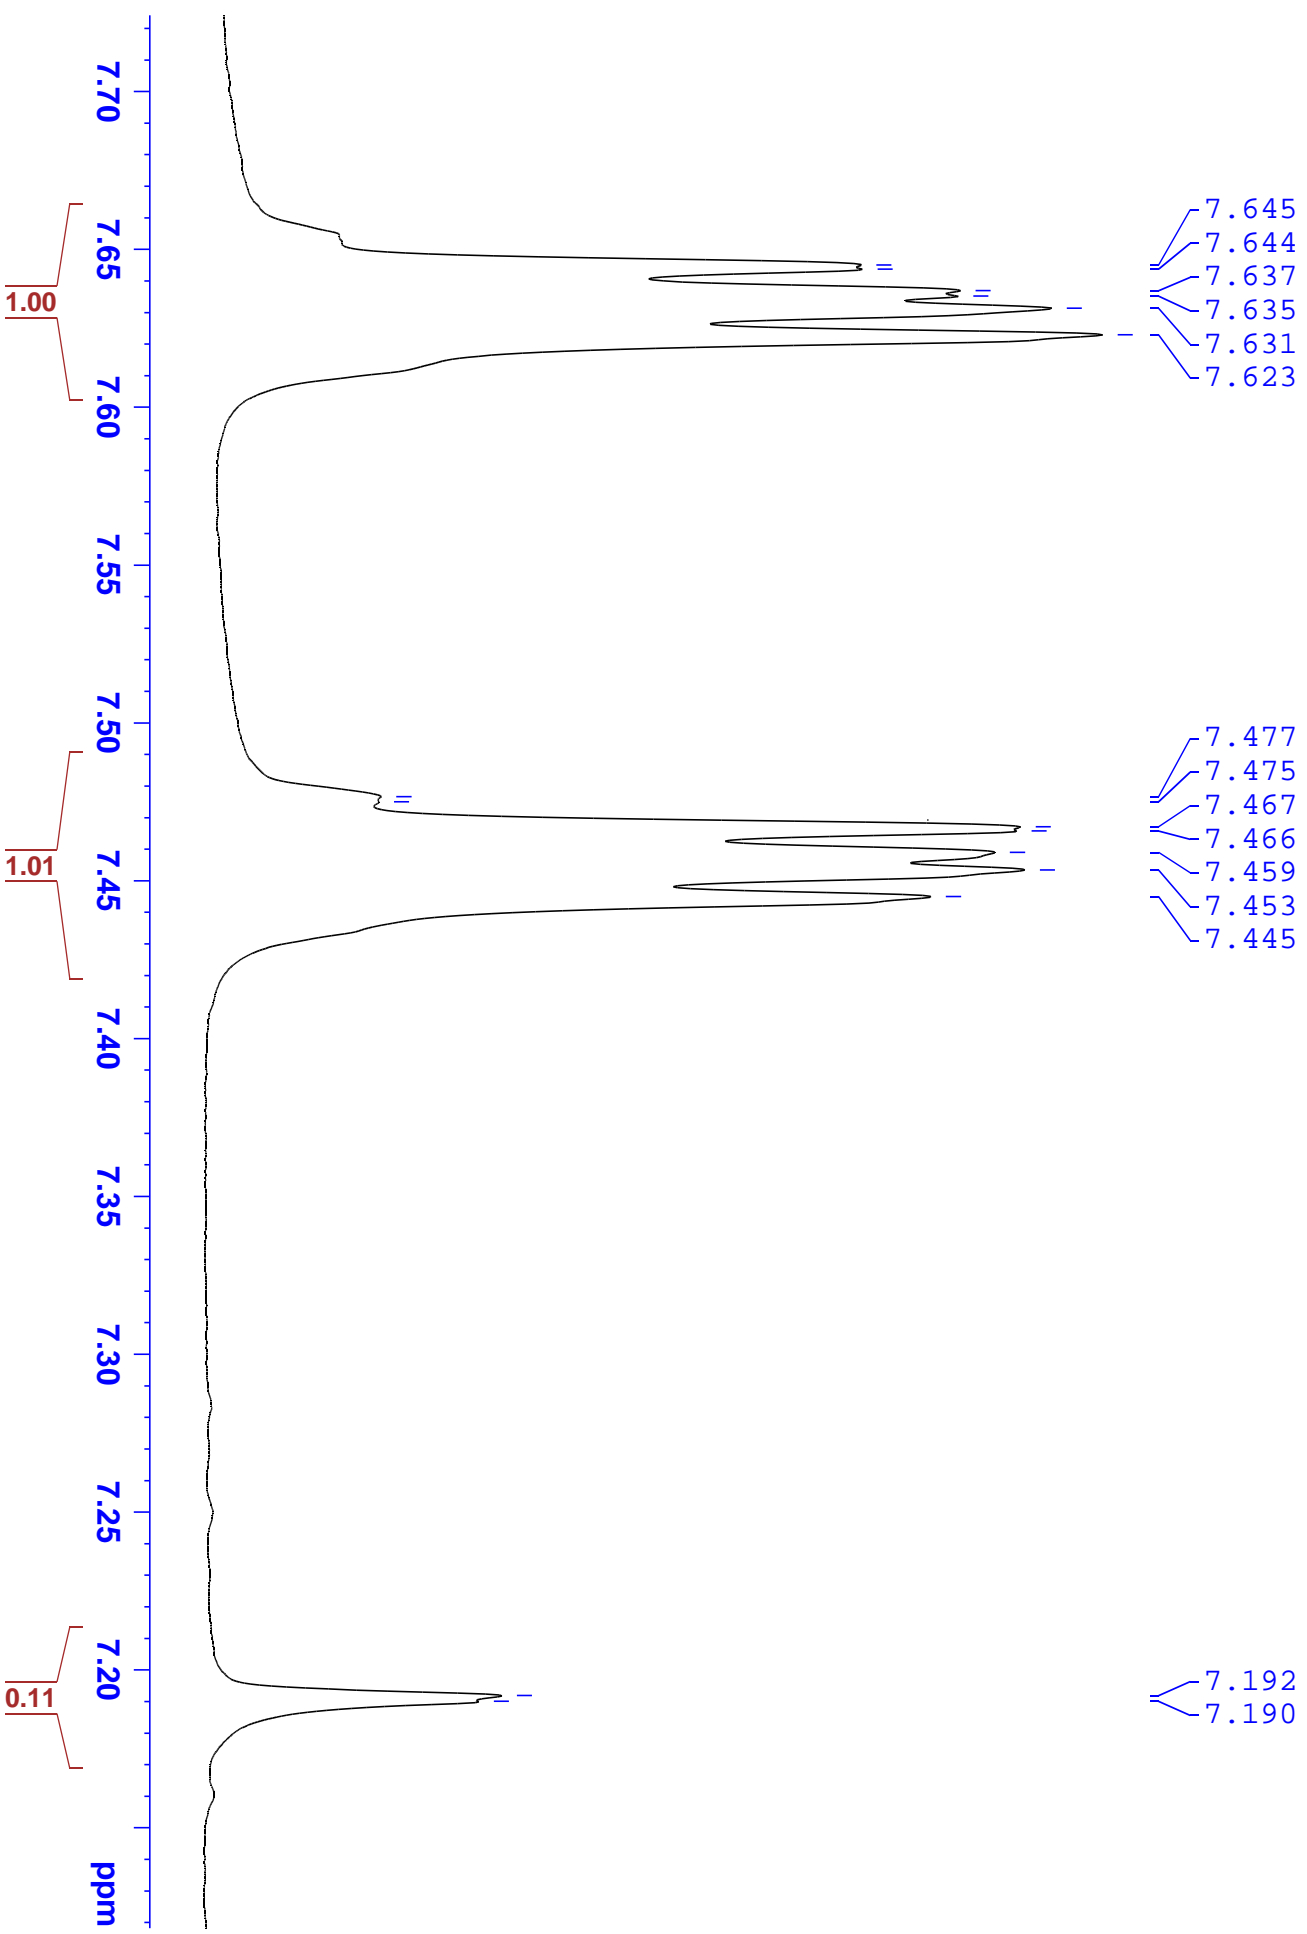

Supplement: d3fo04802k1.zip [file d3fo04802k1.zip]
