# Supplementary material for: New neuroprotective derivatives of cinnamic acid by biotransformation
Source: Royal Society of Chemistry journal article supplement (doi:10.1039/d3fo04802k), 2024-01-01
Supplement: d3fo04802k1.zip [file d3fo04802k1.zip]

# Qualitative Analysis Report

|                                 |                                 |                               |                                                     |
|---------------------------------|---------------------------------|-------------------------------|-----------------------------------------------------|
| <b>Data File</b>                | CM-2.00d07.d                    | <b>Sample Name</b>            | CM-2                                                |
| <b>Sample Type</b>              | Sample                          | <b>Position</b>               | Vial 51                                             |
| <b>Instrument Name</b>          | Instrument 1                    | <b>User Name</b>              |                                                     |
| <b>Acq Method</b>               | HRMS-RES.m                      | <b>Acquired Time</b>          | 4/1/2023 5:01:49 PM (UTC+02:00)                     |
| <b>IRM Calibration Status</b>   | Success                         | <b>DA Method</b>              | khalid focused lc-ms.m                              |
| <b>Comment</b>                  | CM-2-Dr-Hadeer                  |                               |                                                     |
| <b>Method part to run:</b>      | Acquisition Only                | <b>Sample Group</b>           |                                                     |
| <b>Info.</b>                    |                                 | <b>Stream Name</b>            | LC 1                                                |
| <b>Acquisition Time (Local)</b> | 4/1/2023 5:01:49 PM (UTC+02:00) | <b>Acquisition SW Version</b> | 6200 series TOF/6500 series Q-TOF B.09.00 (B9044.0) |
| <b>QTOF Driver Version</b>      | 8.00.00                         | <b>QTOF Firmware Version</b>  | 26.723                                              |
| <b>Tune Mass Range Max.</b>     | 3200                            |                               |                                                     |

## Spectra

Fragmentor Voltage      Collision Energy      Ionization Mode  
200                              0                              ESI

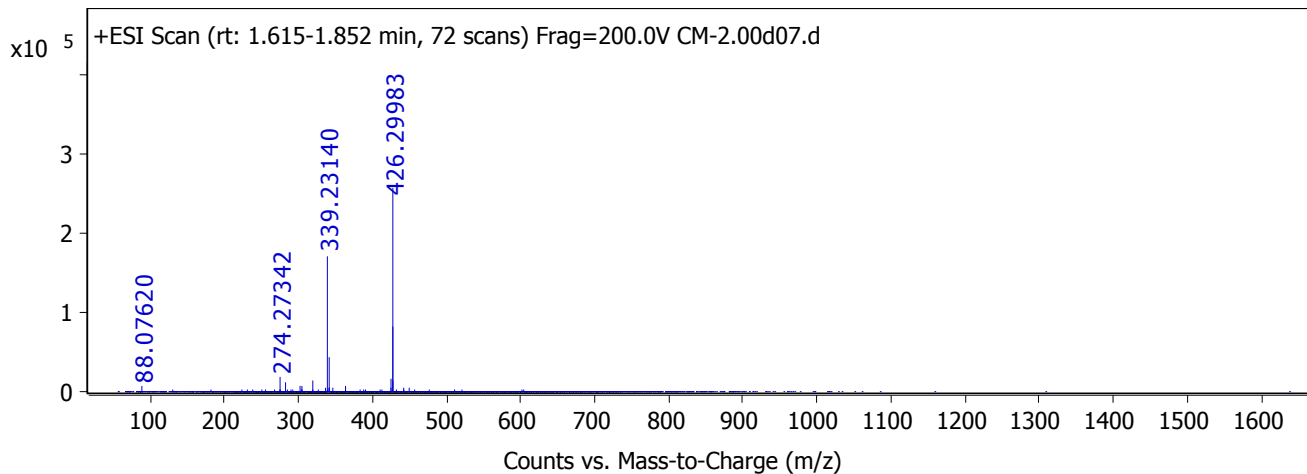

## Peak List

| m/z       | z | Abund     |
|-----------|---|-----------|
| 274.27342 |   | 17293.16  |
| 283.16904 |   | 11454.01  |
| 318.29944 |   | 13367.26  |
| 339.2314  | 1 | 170677.55 |
| 340.2351  | 1 | 43803.9   |
| 362.32543 |   | 7034.86   |
| 424.31899 |   | 16527.26  |
| 426.29983 | 1 | 256358    |
| 427.30323 | 1 | 82419.84  |
| 428.30673 | 1 | 14104.1   |

--- End Of Report ---
