# Supplementary material for: New neuroprotective derivatives of cinnamic acid by biotransformation
Source: Royal Society of Chemistry journal article supplement (doi:10.1039/d3fo04802k), 2024-01-01
Supplement: d3fo04802k1.zip [file d3fo04802k1.zip]

# Qualitative Analysis Report

|                                 |                                 |                               |                                                     |
|---------------------------------|---------------------------------|-------------------------------|-----------------------------------------------------|
| <b>Data File</b>                | CM-3.00d06.d                    | <b>Sample Name</b>            | CM-3                                                |
| <b>Sample Type</b>              | Sample                          | <b>Position</b>               | Vial 61                                             |
| <b>Instrument Name</b>          | Instrument 1                    | <b>User Name</b>              |                                                     |
| <b>Acq Method</b>               | HRMS-RES.m                      | <b>Acquired Time</b>          | 4/1/2023 4:56:06 PM (UTC+02:00)                     |
| <b>IRM Calibration Status</b>   | Success                         | <b>DA Method</b>              | khalid focused lc-ms.m                              |
| <b>Comment</b>                  | CM-3-Dr-Hadeer                  |                               |                                                     |
| <b>Method part to run:</b>      | Acquisition Only                | <b>Sample Group</b>           |                                                     |
| <b>Info.</b>                    |                                 | <b>Stream Name</b>            | LC 1                                                |
| <b>Acquisition Time (Local)</b> | 4/1/2023 4:56:06 PM (UTC+02:00) | <b>Acquisition SW Version</b> | 6200 series TOF/6500 series Q-TOF B.09.00 (B9044.0) |
| <b>QTOF Driver Version</b>      | 8.00.00                         | <b>QTOF Firmware Version</b>  | 26.723                                              |
| <b>Tune Mass Range Max.</b>     | 3200                            |                               |                                                     |

## Spectra

Fragmentor Voltage      Collision Energy      Ionization Mode  
200                              0                              ESI

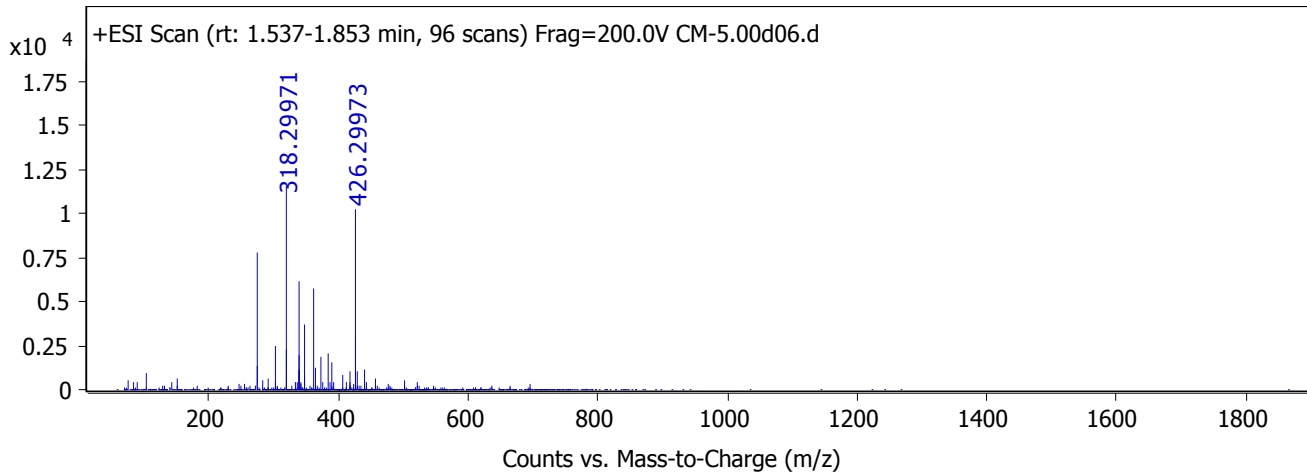

## Peak List

| m/z       | z | Abund    |
|-----------|---|----------|
| 274.27328 |   | 7812.59  |
| 302.30472 |   | 2414.17  |
| 318.29971 | 1 | 11536.97 |
| 319.30278 | 1 | 2264.98  |
| 339.23112 |   | 6154.06  |
| 346.3307  |   | 3644     |
| 362.32579 |   | 5707.73  |
| 384.30732 |   | 2071.95  |
| 426.29973 | 1 | 10186.71 |
| 427.30244 | 1 | 2986.14  |

--- End Of Report ---
