# Supplementary material for: New neuroprotective derivatives of cinnamic acid by biotransformation
Source: Royal Society of Chemistry journal article supplement (doi:10.1039/d3fo04802k), 2024-01-01
Supplement: d3fo04802k1.zip [file d3fo04802k1.zip]

**Mass of metabolite 5**


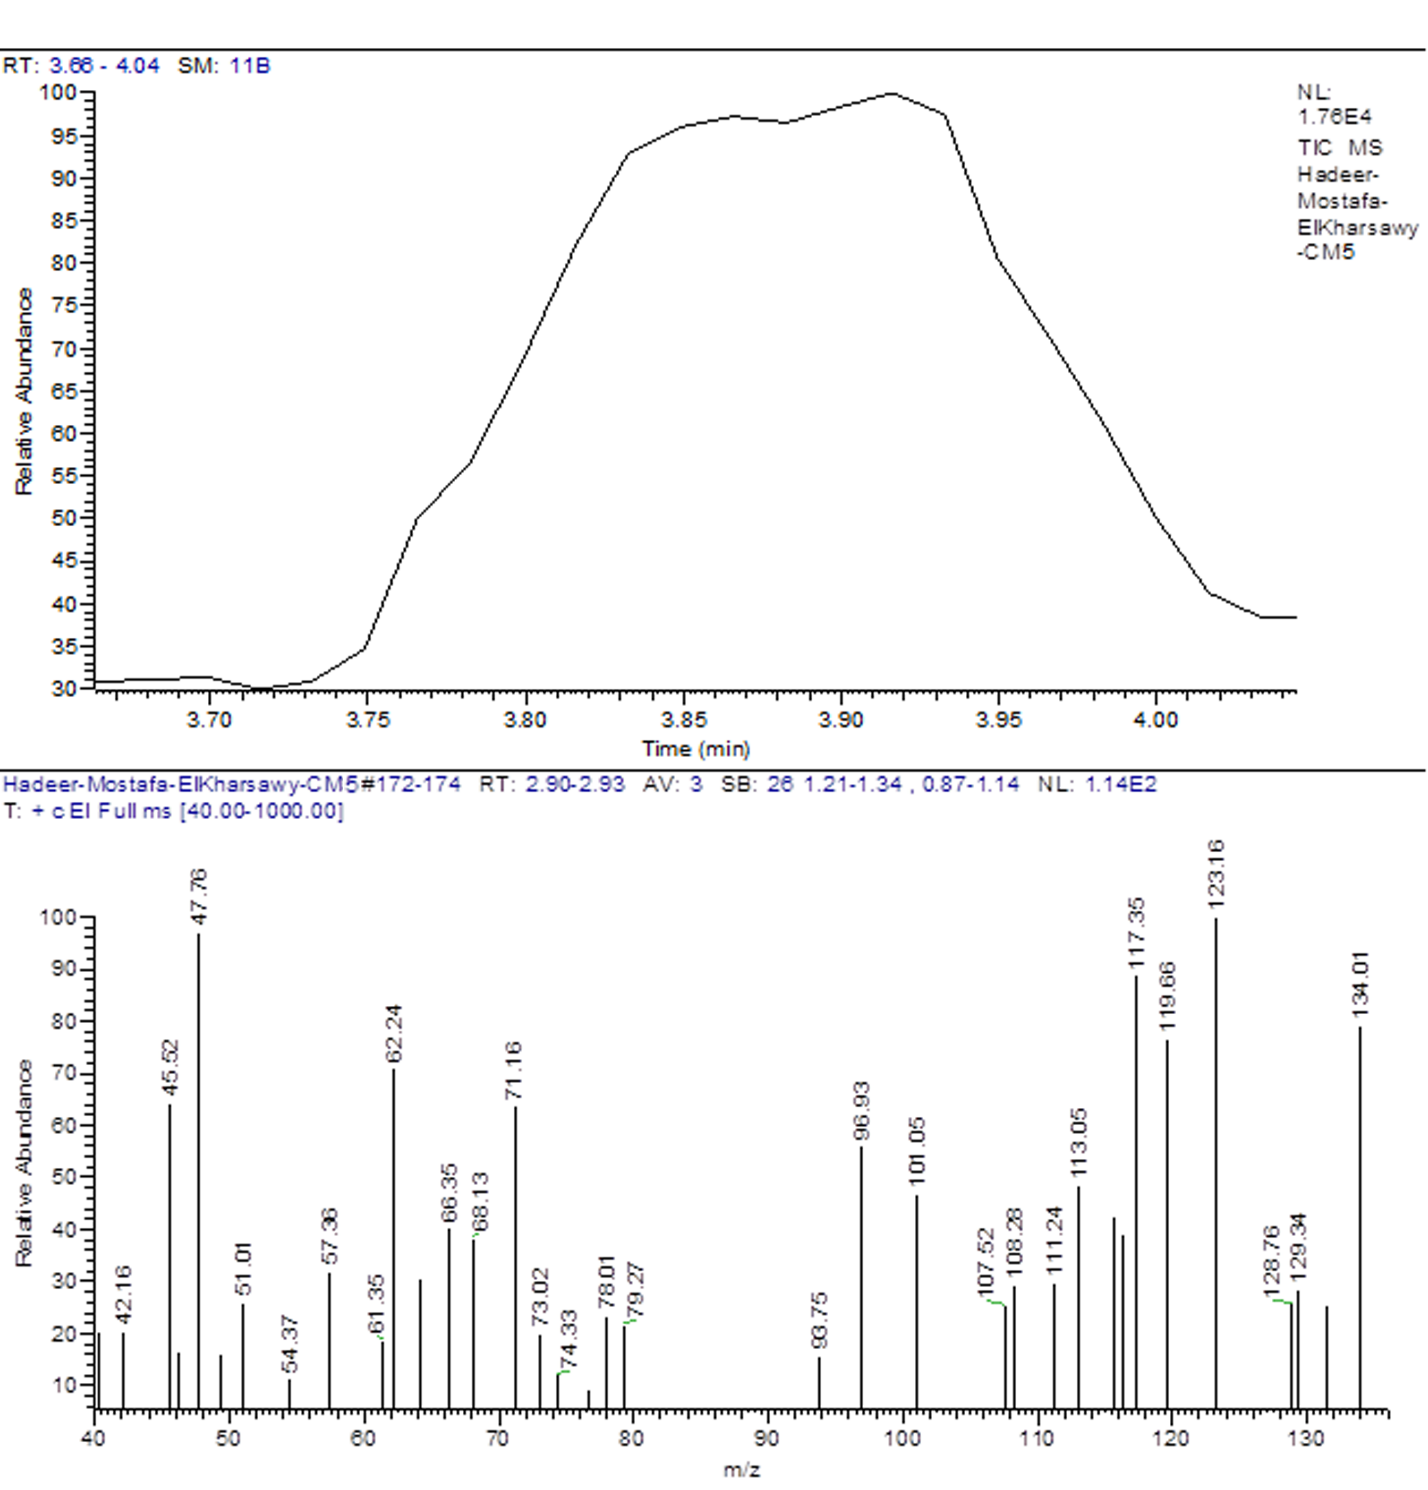


د

m/z Intensity Relative

40.28 23.2 20.34

42.16 23.2 20.43

45.52 73.1 64.23

46.21 18.6 16.37

47.76 110.4 97.03

49.29 18.2 15.97

51.01 29.5 25.93

52.67 6.2 5.49

54.37 12.8 11.21

57.36 36.2 31.84

61.35 21.3 18.76

62.24 80.7 70.87

64.08 34.5 30.30

66.35 45.6 40.04

68.13 43.7 38.39

71.16 72.4 63.64

73.02 22.8 19.99

74.33 13.7 12.04

76.62 10.4 9.14

78.01 26.5 23.31

79.27 24.7 21.66

93.75 17.7 15.54

96.93 63.6 55.91

101.05 53.1 46.69

107.52 28.9 25.35

108.28 33.4 29.36

111.24 33.8 29.72

113.05 55.0 48.34

115.60 48.4 42.53

116.29 44.4 39.01

117.35 101.0 88.72

119.66 87.1 76.50

123.16 113.8 100.00

128.76 29.2 25.61

129.34 32.5 28.52

131.38 28.7 25.21

134.01 89.9 79.03

**Mass of metabolite 4**

m/z Intensity Relative

53.47 6.4 3.04

54.25 3.2 1.52

55.06 45.7 21.77

55.96 133.6 63.66

57.10 60.0 28.61

57.86 27.6 13.17

60.33 71.2 33.95

63.30 70.6 33.64

66.15 21.2 10.12

67.14 24.2 11.54

67.84 20.0 9.54

69.24 8.5 4.06

75.47 139.2 66.32

76.35 8.6 4.11

77.99 0.4 0.21

80.54 66.4 31.67

82.05 198.2 94.47

84.85 209.8 100.00

86.42 48.5 23.12

87.04 32.0 15.26

91.39 44.2 21.09

92.36 38.5 18.36

96.13 6.8 3.22

97.53 76.8 36.61

99.51 37.8 18.01

100.20 26.4 12.57

102.61 17.3 8.26

106.77 27.1 12.90

108.79 24.3 11.59

109.35 46.8 22.29

113.63 51.6 24.61

115.71 29.5 14.08

116.56 146.3 69.71

124.87 10.7 5.09

128.23 6.9 3.28

129.87 112.2 53.50

132.35 48.8 23.24

134.85 97.9 46.66

135.37 19.0 9.07

137.54 20.6 9.83

138.34 28.2 13.46

**Mass of metabolite 6**


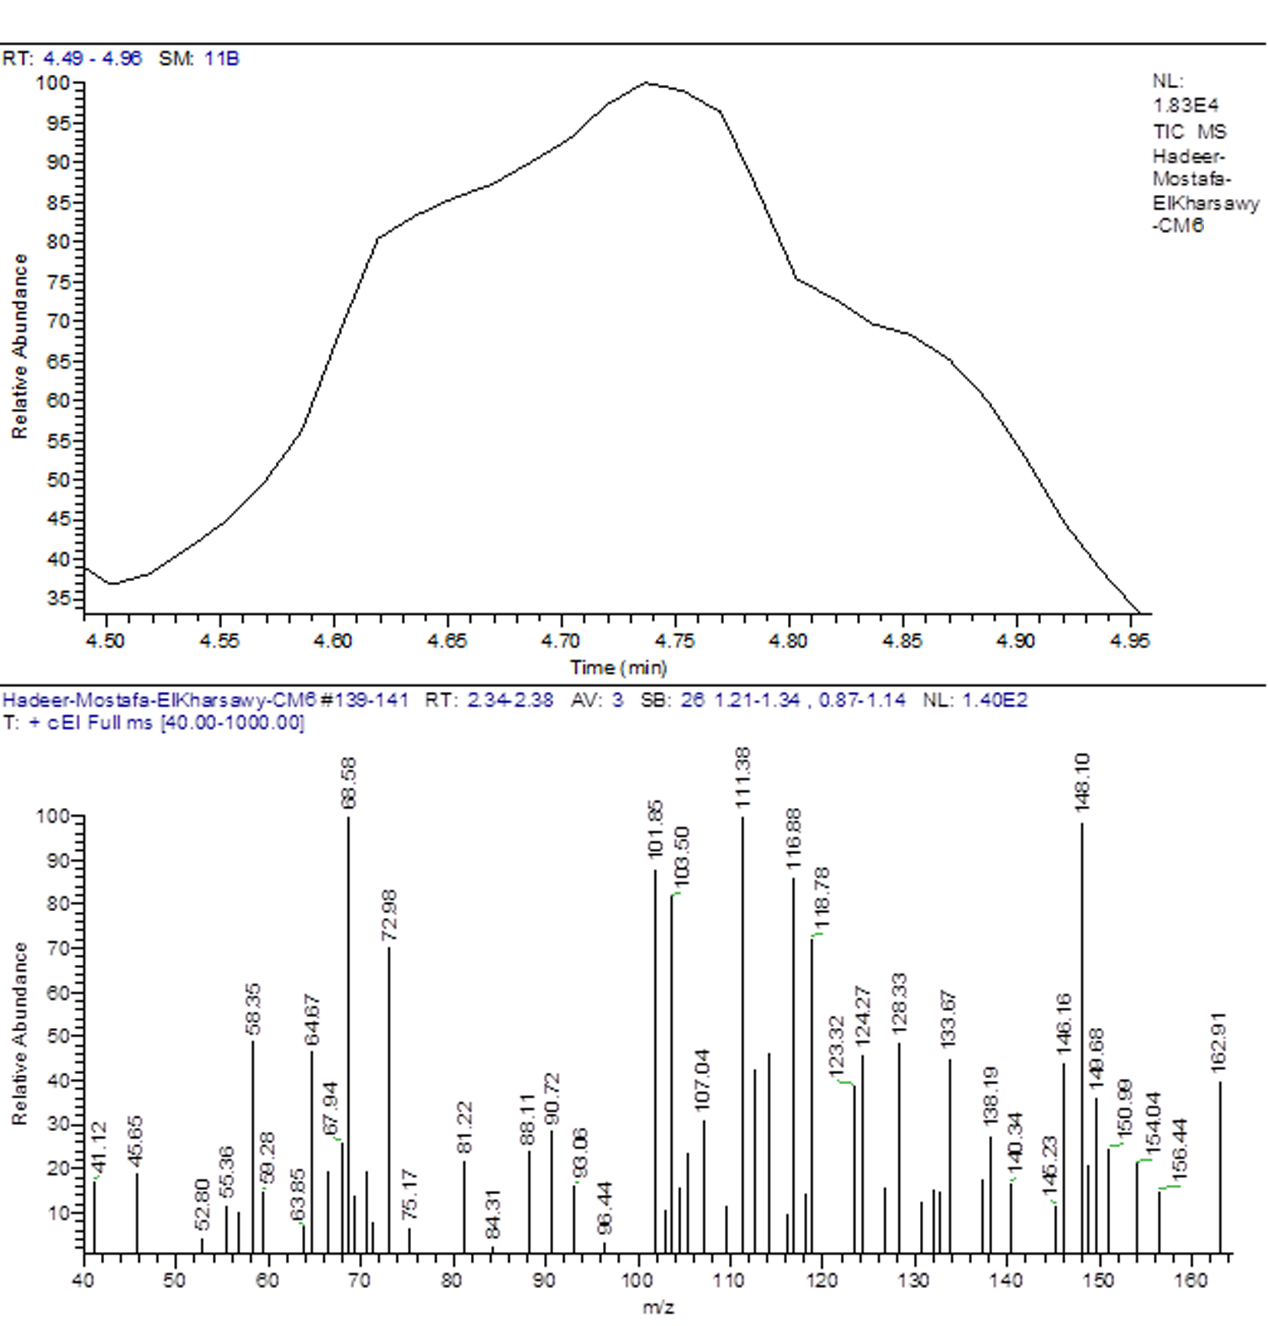


m/z Intensity Relative

41.12 24.3 17.37

45.65 26.4 18.86

52.80 6.4 4.53

55.36 16.6 11.81

56.80 14.5 10.36

58.35 68.7 48.98

59.28 21.0 14.98

63.85 9.7 6.91

64.67 65.4 46.69

66.39 27.2 19.42

67.94 36.5 26.06

68.58 140.2 100.00

69.19 19.2 13.72

70.53 27.1 19.31

71.33 11.4 8.15

72.98 98.4 70.17

75.17 9.3 6.65

81.22 30.7 21.93

84.31 3.5 2.48

88.11 33.6 23.95

90.72 40.3 28.73

93.06 22.9 16.33

96.44 4.8 3.44

101.85 123.3 87.96

102.91 15.4 10.98

103.50 114.4 81.63

104.43 22.1 15.80

105.46 33.4 23.80

107.04 43.3 30.93

109.54 16.4 11.68

111.38 139.8 99.74

112.62 59.7 42.59

114.17 65.3 46.62

116.05 13.4 9.54

116.88 120.6 86.02

118.18 20.5 14.65

118.78 101.6 72.45

123.32 54.4 38.82

124.27 64.2 45.79

126.67 22.2 15.83

128.33 68.1 48.58

130.65 17.6 12.54

132.00 21.6 15.43

132.71 21.2 15.12

133.67 63.1 44.98

137.32 24.7 17.61

138.19 38.4 27.37

140.34 23.7 16.90

145.23 16.5 11.79

146.16 61.5 43.89

148.10 138.1 98.51

148.82 29.5 21.02

149.68 50.3 35.91

150.99 34.7 24.73

154.04 29.9 21.31

156.44 21.3 15.20

162.91 55.7 39.72

**Mass of metabolite 3**


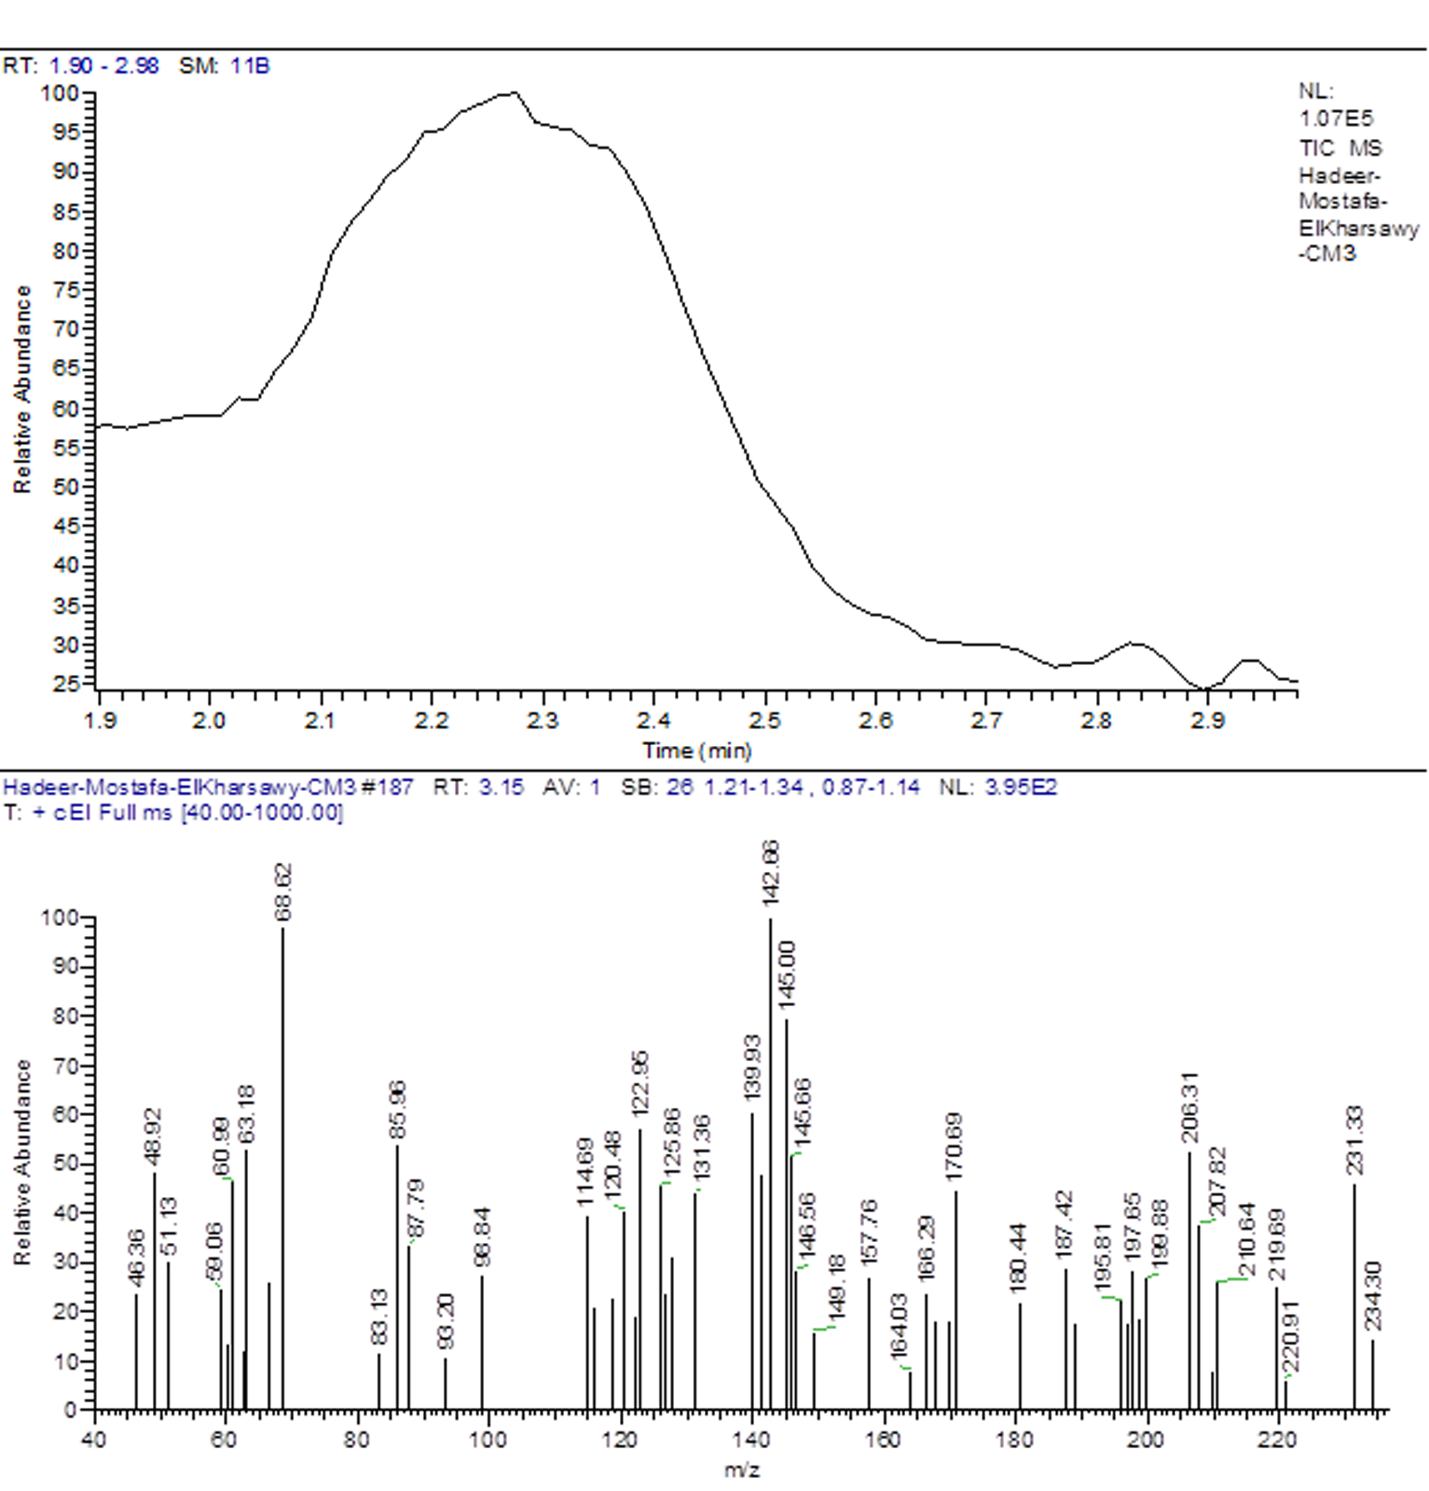


m/z Intensity Relative

46.36 92.9 23.50

48.92 189.8 48.00

51.13 118.9 30.07

59.06 97.6 24.69

60.16 52.5 13.27

60.99 183.2 46.34

62.57 48.1 12.17

63.18 208.2 52.64

66.46 103.5 26.17

68.62 387.6 98.03

83.13 45.8 11.57

85.96 212.8 53.81

87.79 132.6 33.54

93.20 42.0 10.63

98.84 108.6 27.46

114.69 155.3 39.27

115.75 81.6 20.64

118.49 90.4 22.86

120.48 160.5 40.59

122.10 75.3 19.03

122.95 226.2 57.21

125.86 179.7 45.45

126.49 93.5 23.64

127.75 122.7 31.03

131.36 174.4 44.10

139.93 238.7 60.38

141.27 188.7 47.71

142.66 395.4 100.00

145.00 313.8 79.35

145.66 203.2 51.39

146.56 111.9 28.31

149.18 62.7 15.86

157.76 106.4 26.92

164.03 31.1 7.87

166.29 93.6 23.67

167.82 70.8 17.90

169.73 72.4 18.30

170.69 176.1 44.54

180.44 85.3 21.58

187.42 112.9 28.56

188.89 70.5 17.84

195.81 87.3 22.07

196.78 69.6 17.60

197.65 111.7 28.26

198.66 74.3 18.80

199.88 105.5 26.67

206.31 208.8 52.80

207.82 148.8 37.64

209.76 31.5 7.97

210.64 101.9 25.77

219.69 98.8 25.00

220.91 24.8 6.26

231.33 182.1 46.06

234.30 56.6 14.32

**Mass of metabolite 2**

m/z Intensity Relative

42.27 69.6 35.60

43.28 34.6 17.68

44.24 31.4 16.07

45.63 45.5 23.25

49.48 31.6 16.16

51.82 57.9 29.60

52.35 30.1 15.39

53.21 81.3 41.59

55.44 30.0 15.33

56.53 17.7 9.07

58.66 15.4 7.86

60.05 55.5 28.38

61.69 79.6 40.68

62.83 45.6 23.32

63.84 32.2 16.48

65.42 21.4 10.93

67.03 25.3 12.93

68.46 114.2 58.38

73.12 40.6 20.75

77.35 195.6 100.00

78.80 21.2 10.83

80.88 0.9 0.44

87.47 50.4 25.77

93.06 31.1 15.91

94.53 26.3 13.45

103.94 17.0 8.68

105.92 71.0 36.32

106.68 29.4 15.04

109.93 27.1 13.85

111.60 87.1 44.52

112.37 46.7 23.89

113.23 23.6 12.04

115.94 22.6 11.57

117.35 25.9 13.23

119.91 21.0 10.75

122.59 61.9 31.63

128.17 19.8 10.12

130.60 41.2 21.09

131.53 110.0 56.23

136.54 34.4 17.57

138.13 13.5 6.91

140.34 24.1 12.34

141.17 65.5 33.48

144.20 104.3 53.32

144.84 17.1 8.72

145.34 29.6 15.14

146.39 30.5 15.61

147.20 27.1 13.86

149.22 11.1 5.69

150.80 64.5 33.01

151.33 21.5 10.97

152.40 89.5 45.75

153.89 37.7 19.29

156.62 27.3 13.98

158.06 51.2 26.20

158.56 23.0 11.75

159.65 21.8 11.16

161.09 15.1 7.71

165.11 21.4 10.93

167.34 28.0 14.29

168.92 30.9 15.79

173.46 81.4 41.63

174.53 35.2 18.02

175.48 94.7 48.41

176.88 23.2 11.86

178.66 34.1 17.45

180.09 19.3 9.89

181.40 92.1 47.09

183.14 65.1 33.29

184.94 28.3 14.45

186.20 74.2 37.94

187.21 36.6 18.73

187.95 66.7 34.09

189.52 37.1 18.95

190.22 38.0 19.43
