# Supplementary figures and images for: New neuroprotective derivatives of cinnamic acid by biotransformation
Source: Royal Society of Chemistry journal article supplement (doi:10.1039/d3fo04802k), 2024-01-01

Hadeer Elkharasawy-CM4-HNMR-AF

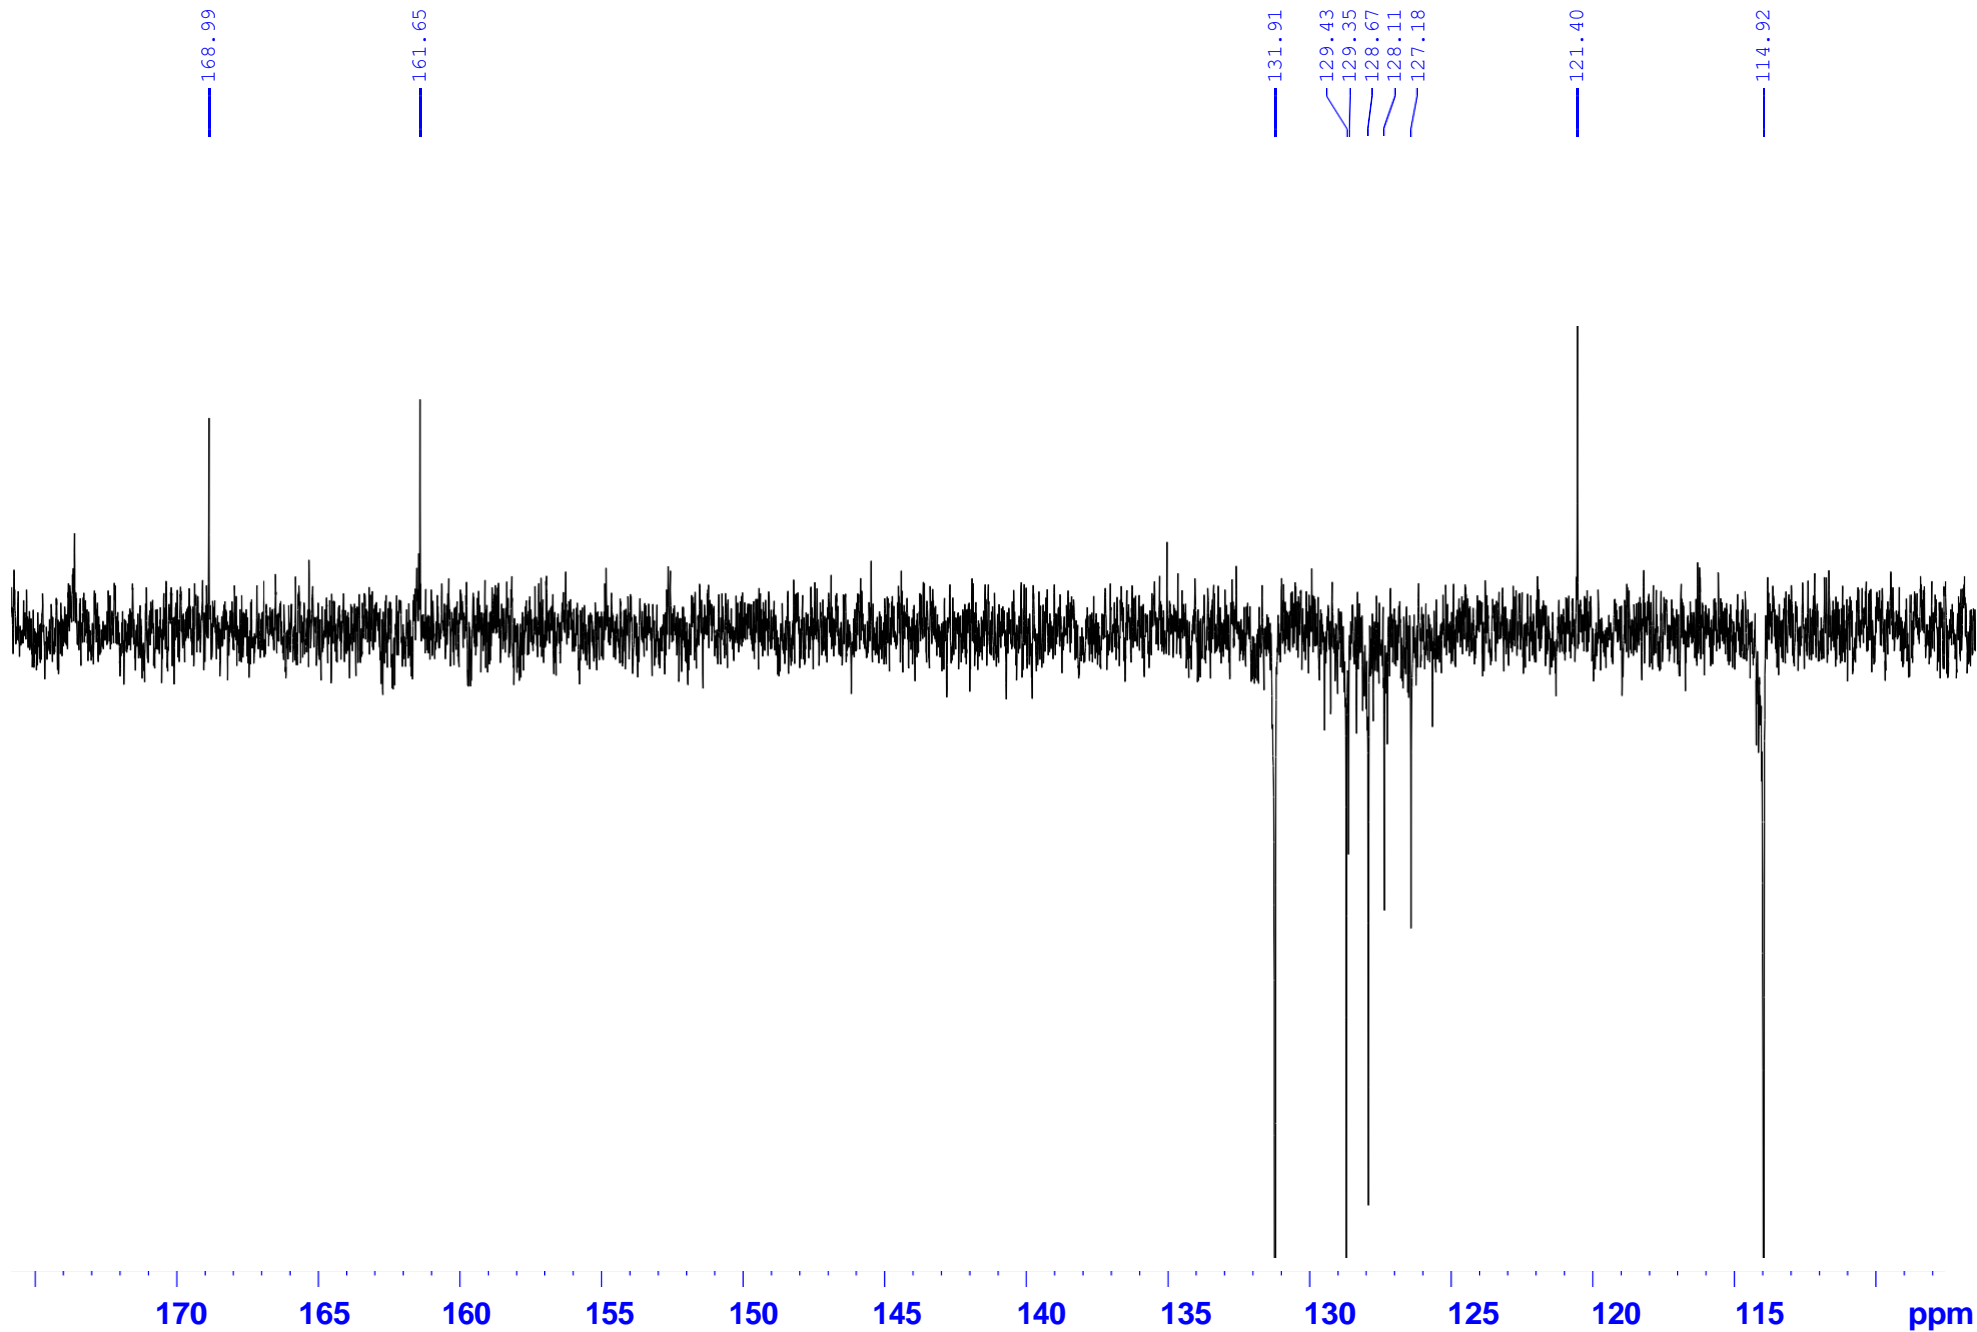

Hadeer Elkharasawy-CM4-HNMR-AF

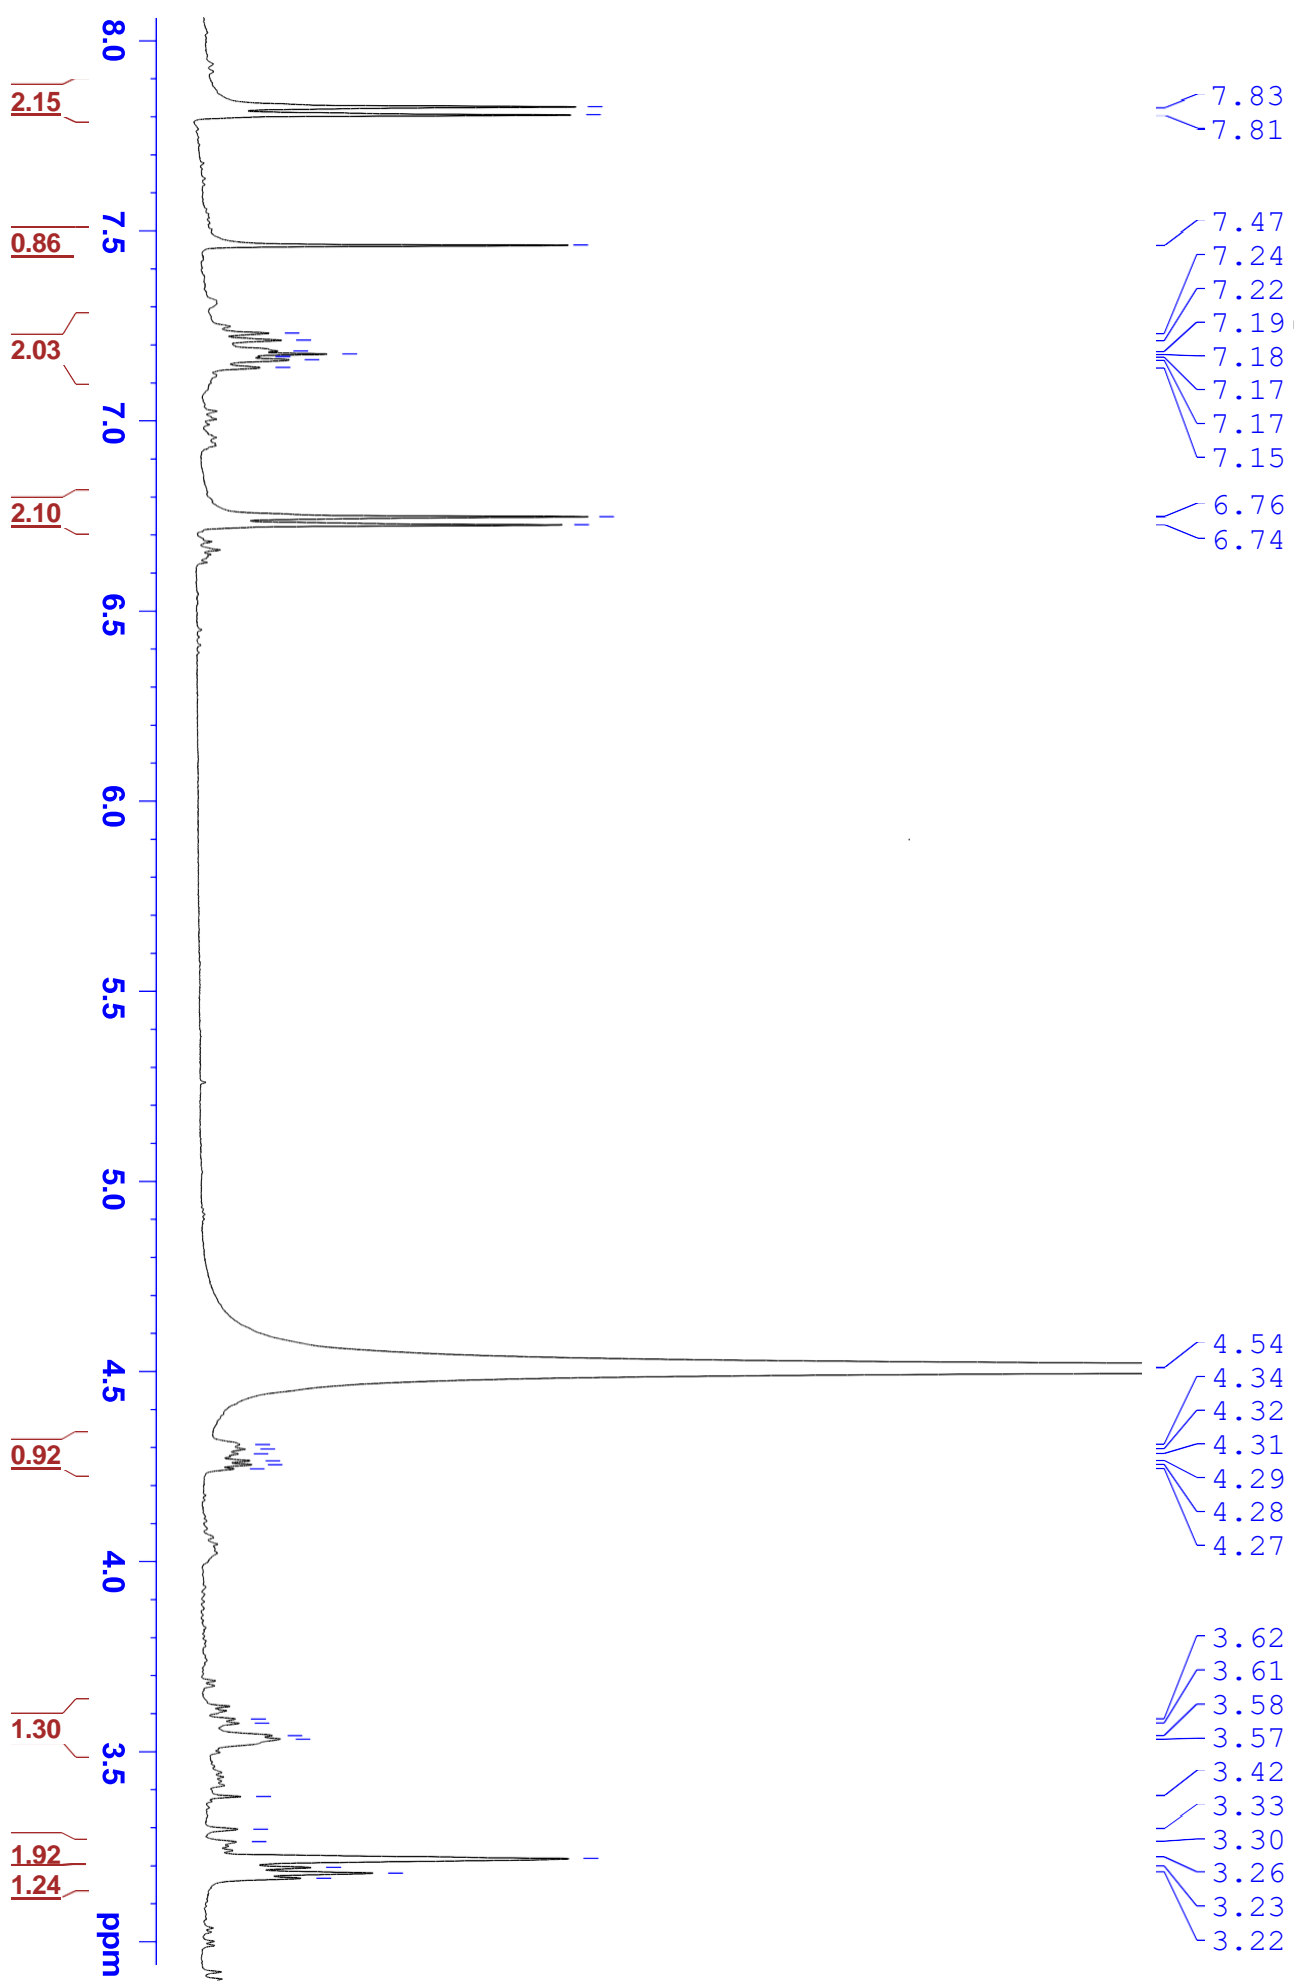

Supplement: d3fo04802k1.zip [file d3fo04802k1.zip]
